# Supplementary material for: Identifying cis -mediators for trans -eQTLs across many human tissues using genomic mediation analysis
Source: HighWire-hosted journal article supplement (doi:10.1101/gr.216754.116), 2017-10-11
Supplement: Supplemental_Figs.pdf [file Supplemental_Figs.pdf]

**Supplemental Figure S1.** Plots of negative log base 10 of mediation p-values versus the percentage of reduction in trans-effects. The mediation p-values are calculated after accounting for cis-mediation, based on mediation tests for all 44 tissue types adjusting for known covariates including age, gender and genotype derived PCs and (A) with no adjustment of hidden confounders, (B) adjusting for all PEER factors, (C) adjusting for adaptively selected PEER factors, and (D) adjusting for selected expression-derived PCs (i.e., our final analysis). P-values are truncated at  $10^{-16}$ .

## Adipose\_Subcutaneous

A. Adjust Known Covariates Only

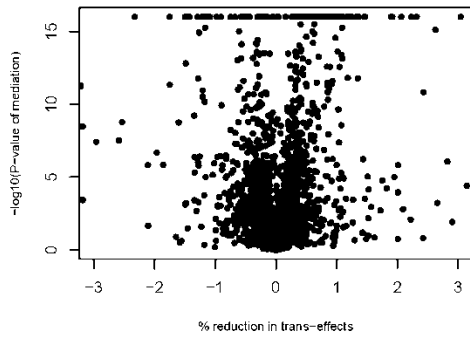

B. Adjust Known + All PEER

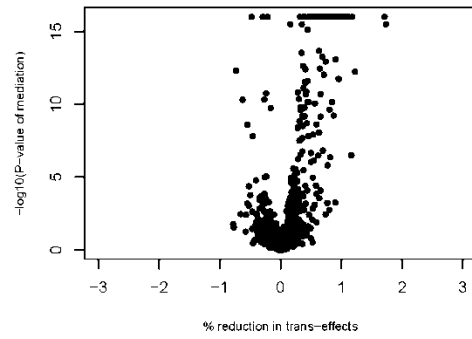

C. Adjust Known + Adaptively Selected PEER

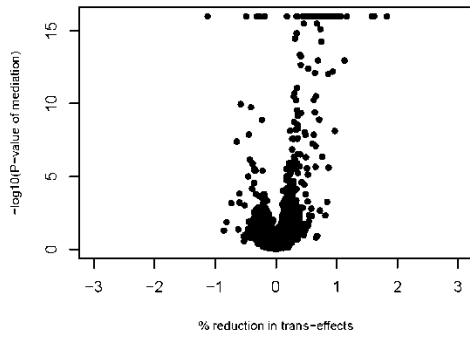

D. Adjust Known Covariates + Adaptively Selected PC (Final Analysis)

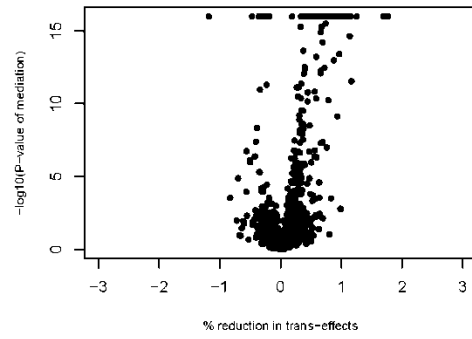

# Adipose\_Visceral\_Omentum

A. Adjust Known Covariates Only

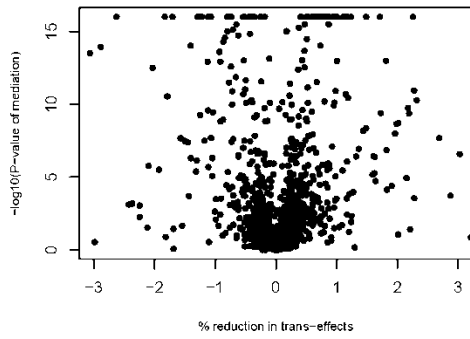

B. Adjust Known + All PEER

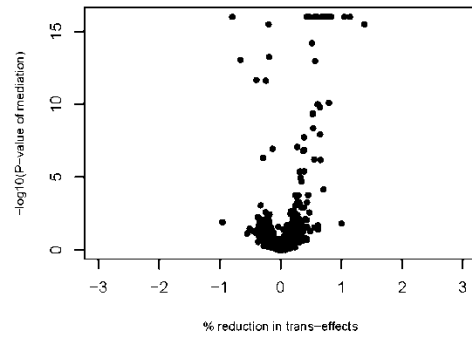

C. Adjust Known + Adaptively Selected PEER

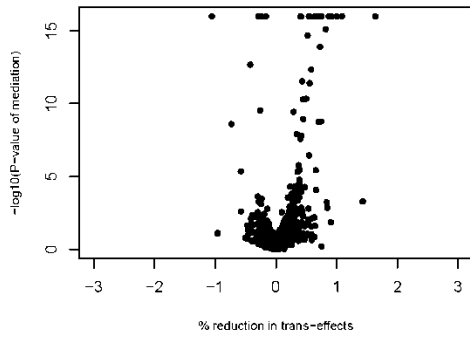

D. Adjust Known Covariates + Adaptively Selected PC (Final Analysis)

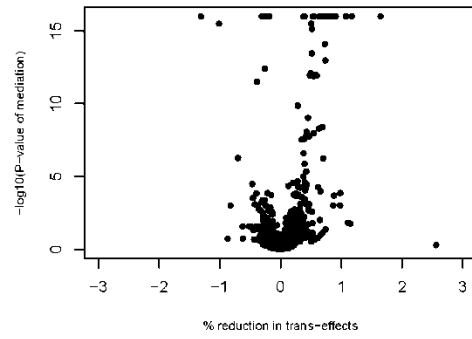

## Adrenal\_Gland

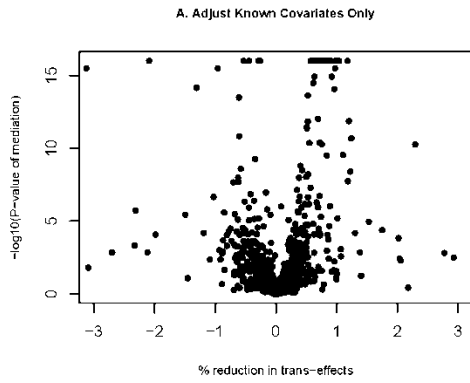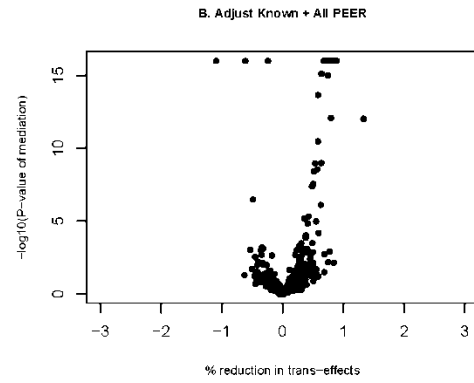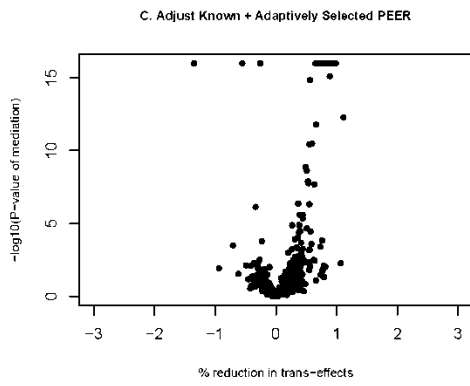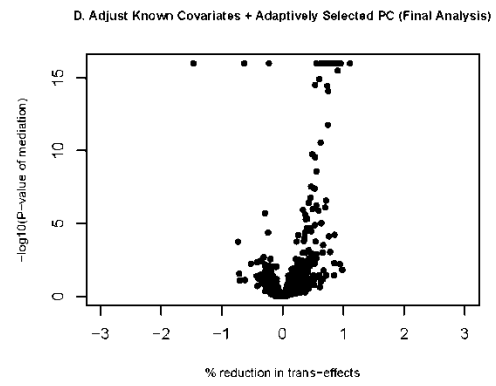

## Artery\_Aorta

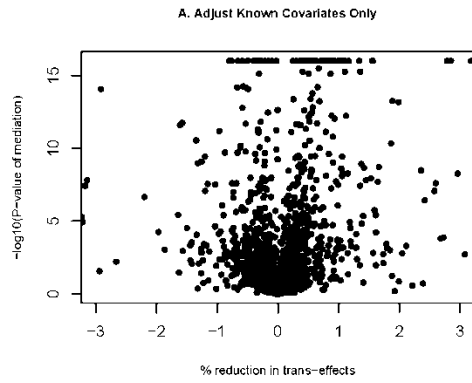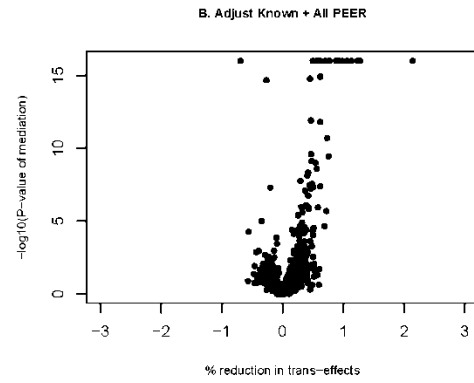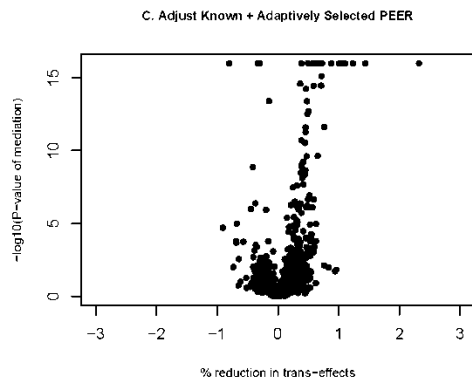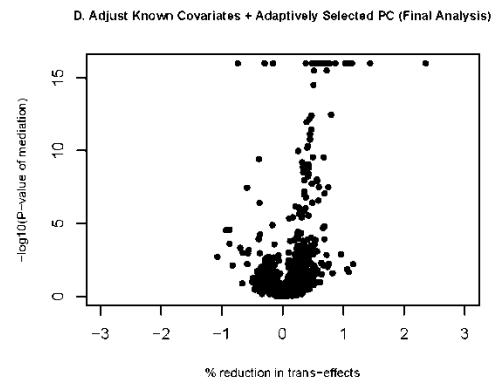

## Artery\_Coronary

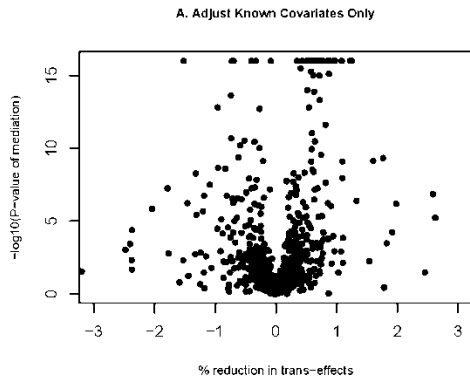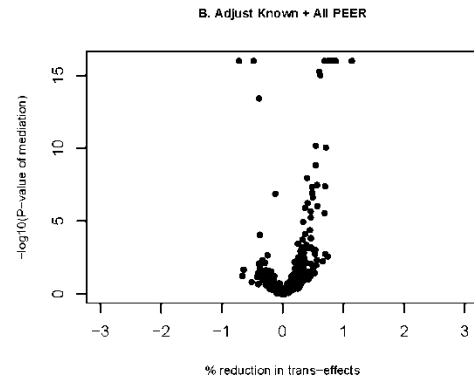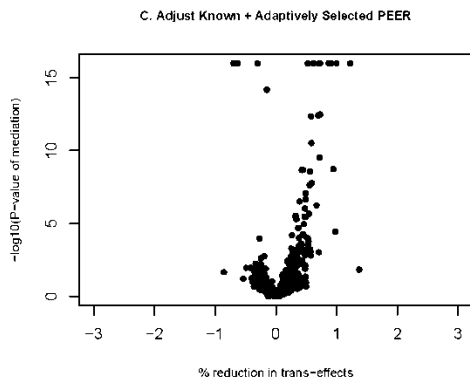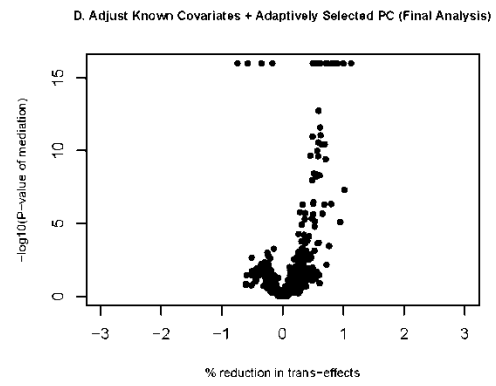

## Artery\_Tibial

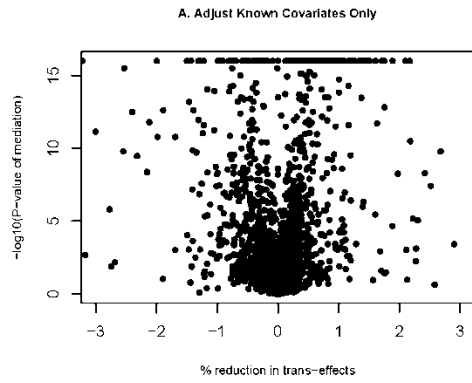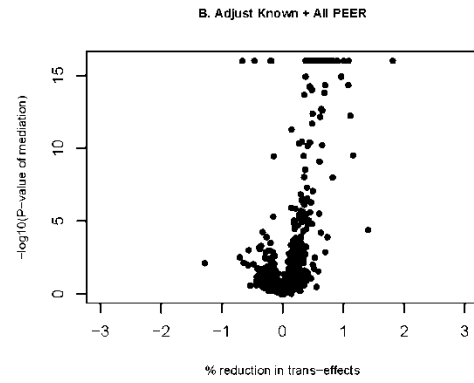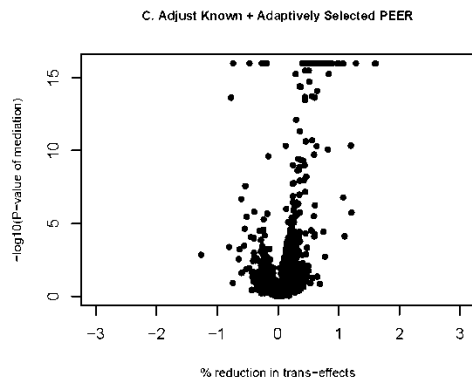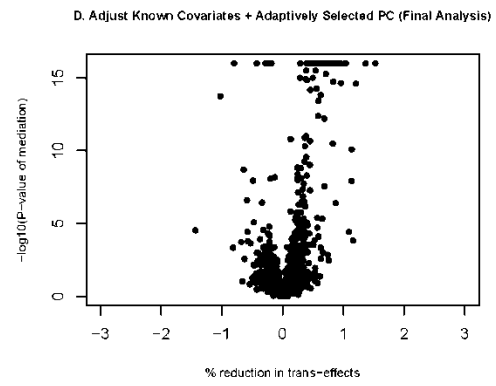

# Brain\_Anterior\_cingulate\_cortex\_BA24

A. Adjust Known Covariates Only

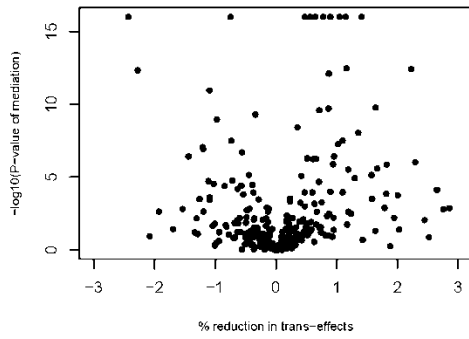

B. Adjust Known + All PEER

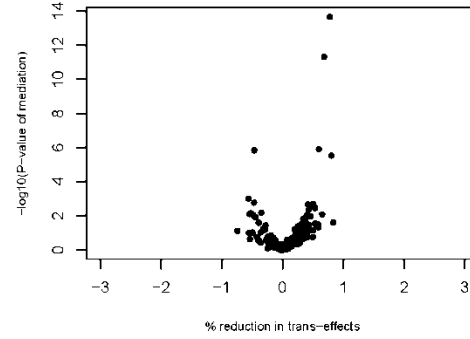

C. Adjust Known + Adaptively Selected PEER

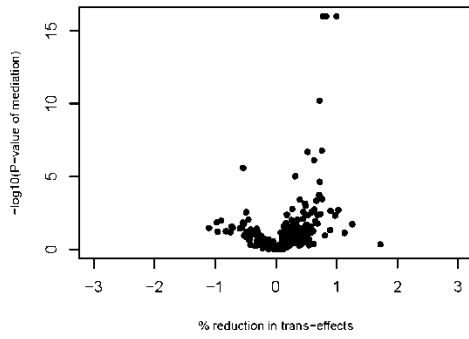

D. Adjust Known Covariates + Adaptively Selected PC (Final Analysis)

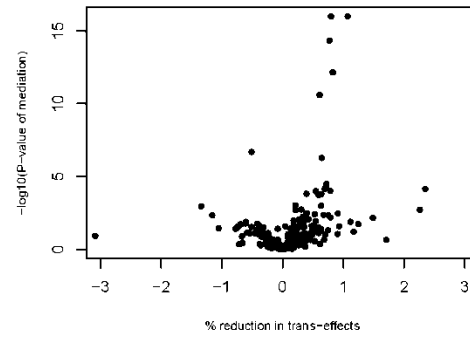



# Brain\_Caudate\_basal\_ganglia

A. Adjust Known Covariates Only

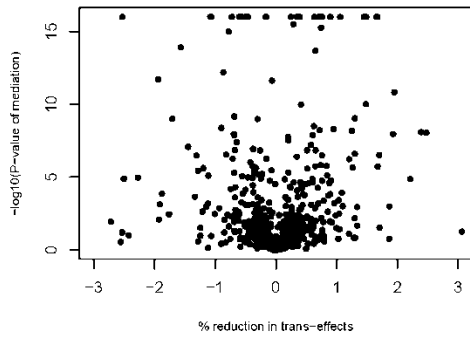

B. Adjust Known + All PEER

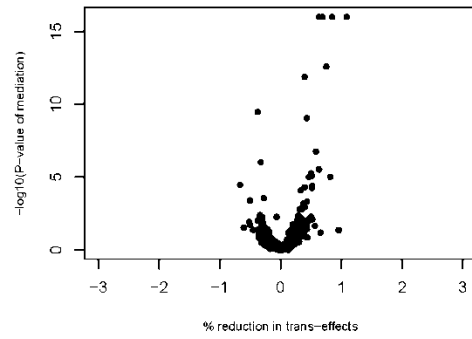

C. Adjust Known + Adaptively Selected PEER

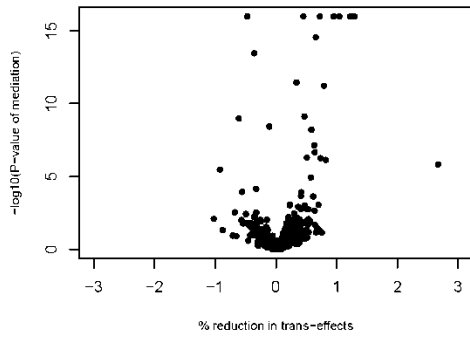

D. Adjust Known Covariates + Adaptively Selected PC (Final Analysis)

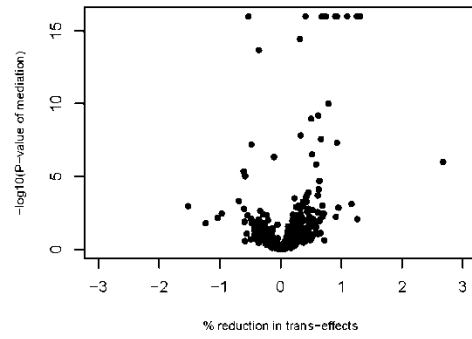

# Brain\_Cerebellar\_Hemisphere

A. Adjust Known Covariates Only

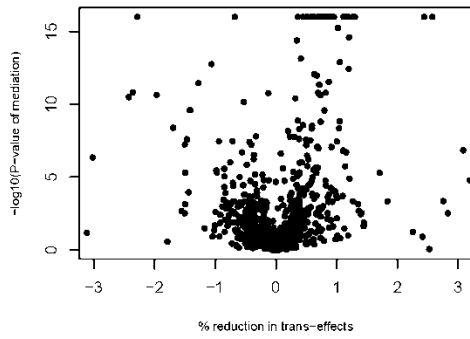

B. Adjust Known + All PEER

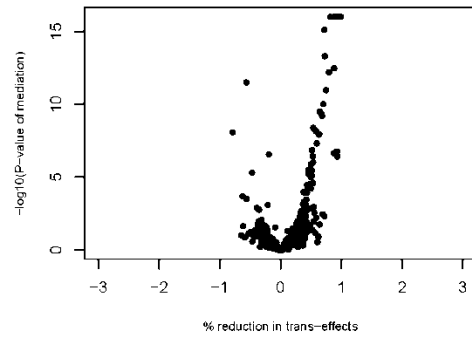

C. Adjust Known + Adaptively Selected PEER

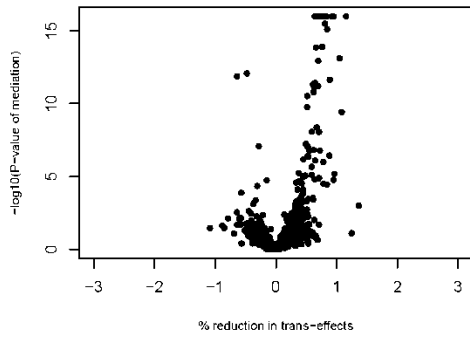

D. Adjust Known Covariates + Adaptively Selected PC (Final Analysis)

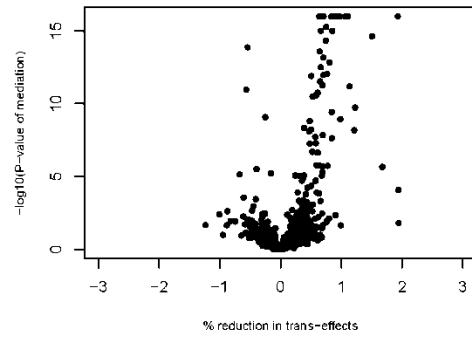

## Brain\_Cerebellum

A. Adjust Known Covariates Only

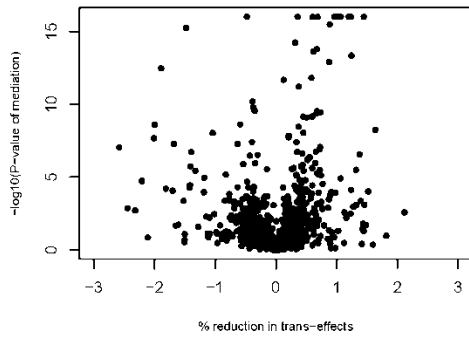

B. Adjust Known + All PEER

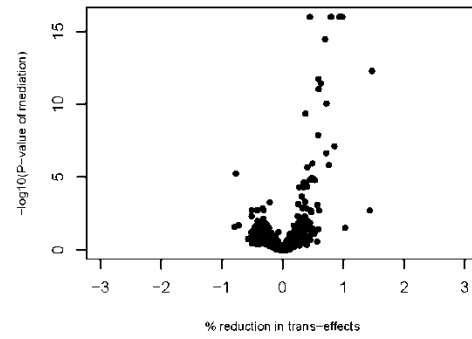

C. Adjust Known + Adaptively Selected PEER

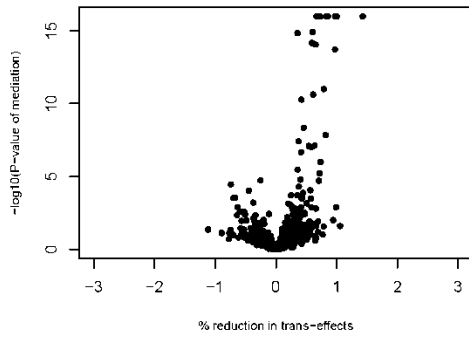

D. Adjust Known Covariates + Adaptively Selected PC (Final Analysis)

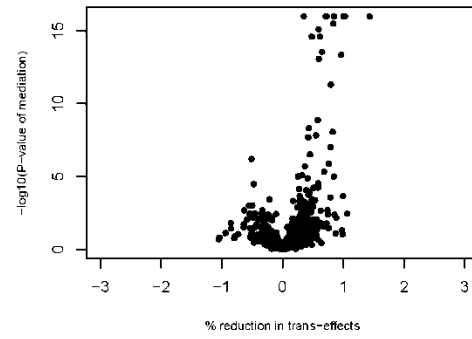

## Brain\_Cortex

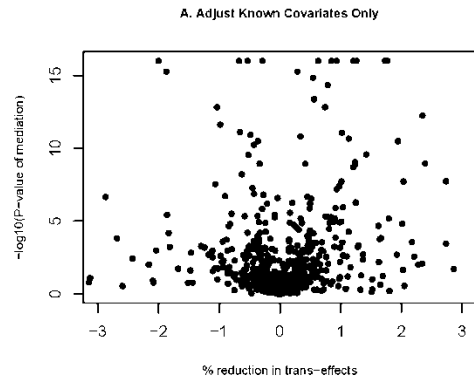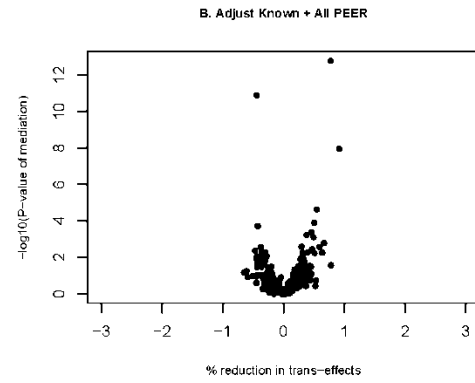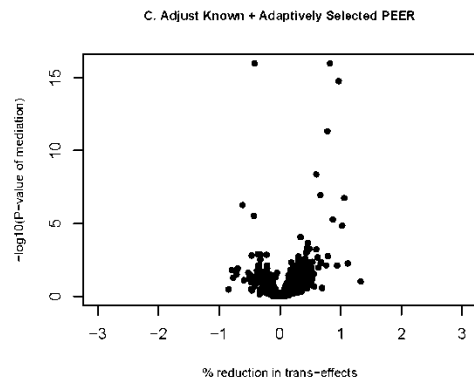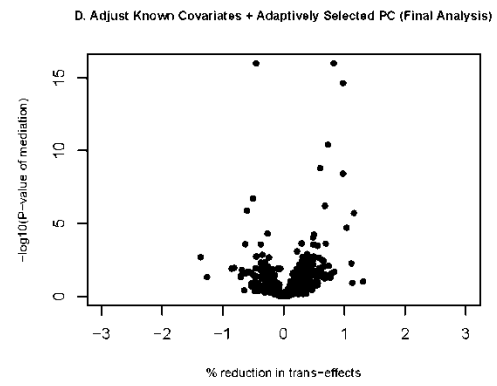

# Brain\_Frontal\_Cortex\_BA9

A. Adjust Known Covariates Only

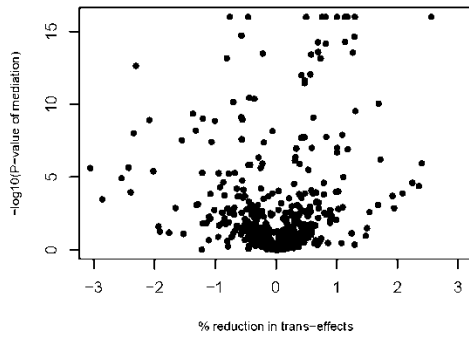

B. Adjust Known + All PEER

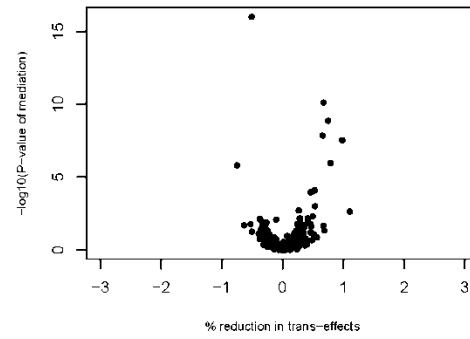

C. Adjust Known + Adaptively Selected PEER

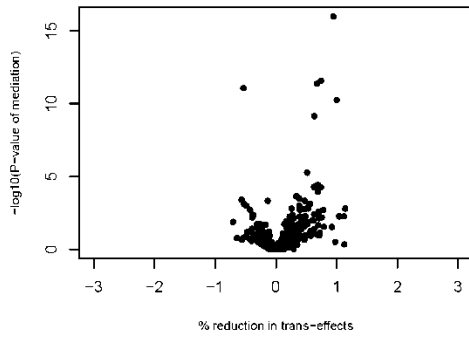

D. Adjust Known Covariates + Adaptively Selected PC (Final Analysis)

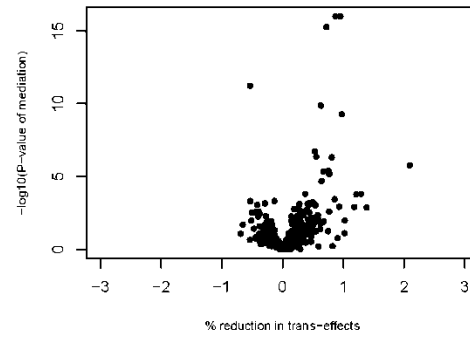

## Brain\_Hippocampus

A. Adjust Known Covariates Only

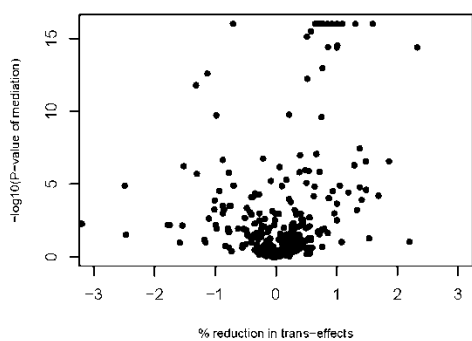

B. Adjust Known + All PEER

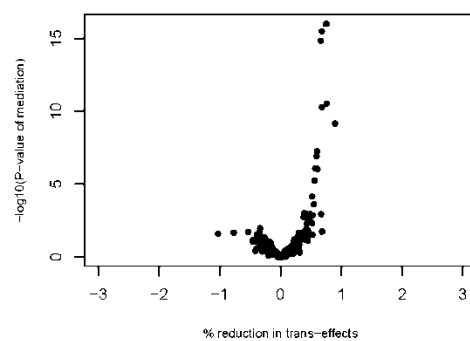

C. Adjust Known + Adaptively Selected PEER

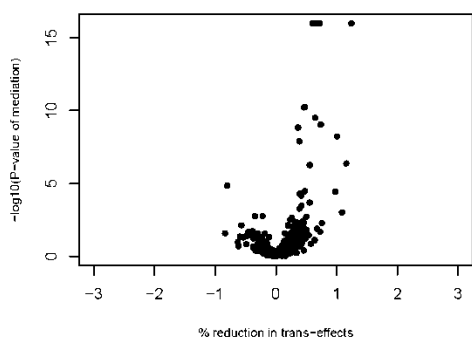

D. Adjust Known Covariates + Adaptively Selected PC (Final Analysis)

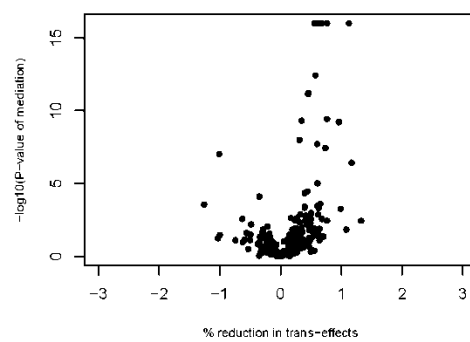

## Brain\_Hypothalamus

A. Adjust Known Covariates Only

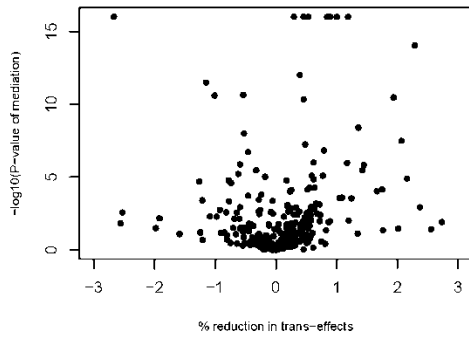

B. Adjust Known + All PEER

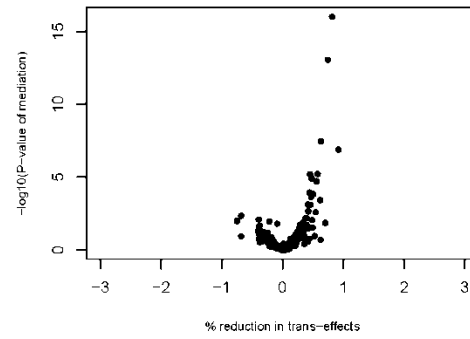

C. Adjust Known + Adaptively Selected PEER

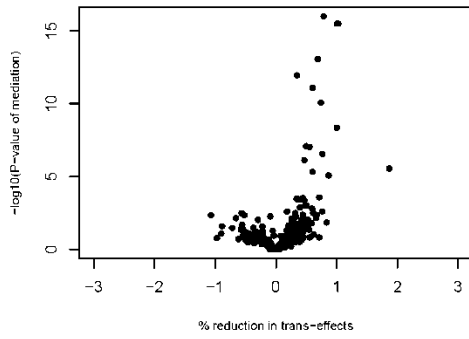

D. Adjust Known Covariates + Adaptively Selected PC (Final Analysis)

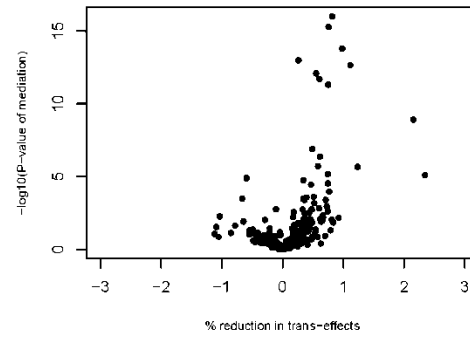

# Brain\_Nucleus\_accumbens\_basal\_ganglia

A. Adjust Known Covariates Only

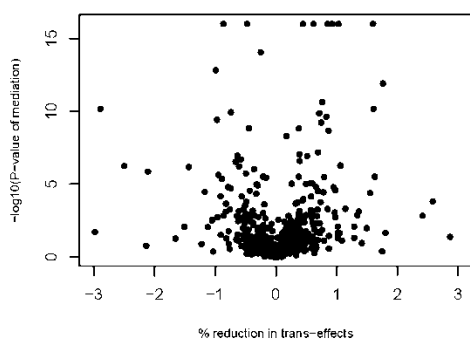

B. Adjust Known + All PEER

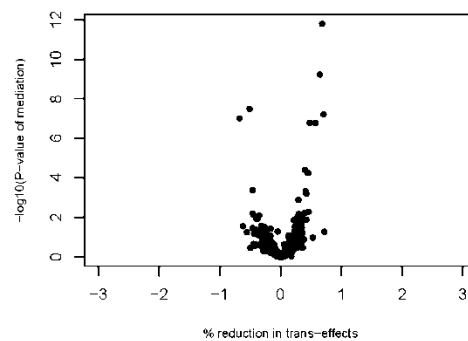

C. Adjust Known + Adaptively Selected PEER

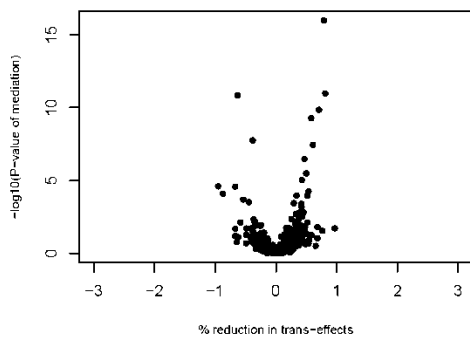

D. Adjust Known Covariates + Adaptively Selected PC (Final Analysis)

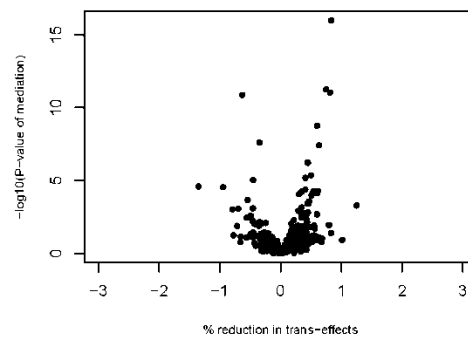



# Brain\_Putamen\_basal\_ganglia

A. Adjust Known Covariates Only

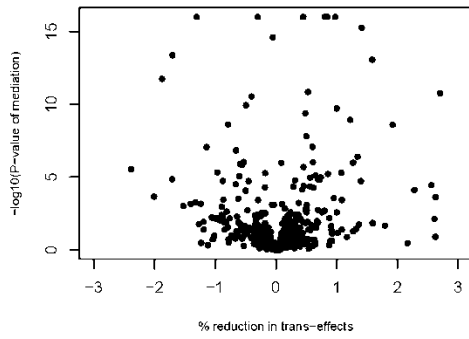

B. Adjust Known + All PEER

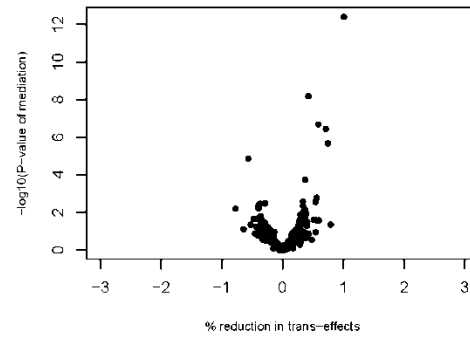

C. Adjust Known + Adaptively Selected PEER

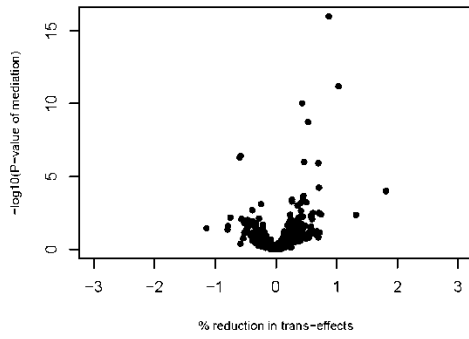

D. Adjust Known Covariates + Adaptively Selected PC (Final Analysis)

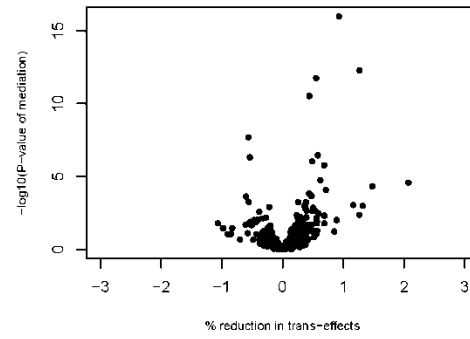

## Breast\_Mammary\_Tissue

A. Adjust Known Covariates Only

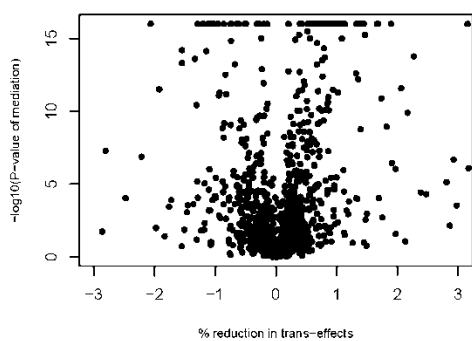

B. Adjust Known + All PEER

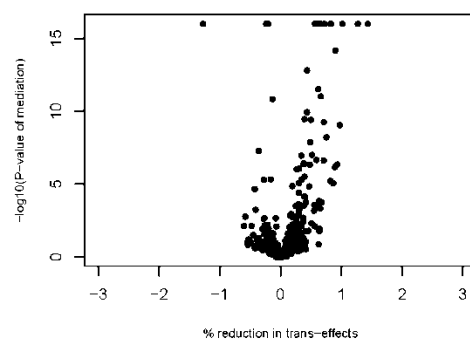

C. Adjust Known + Adaptively Selected PEER

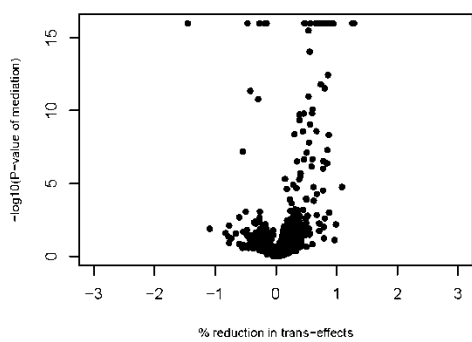

D. Adjust Known Covariates + Adaptively Selected PC (Final Analysis)

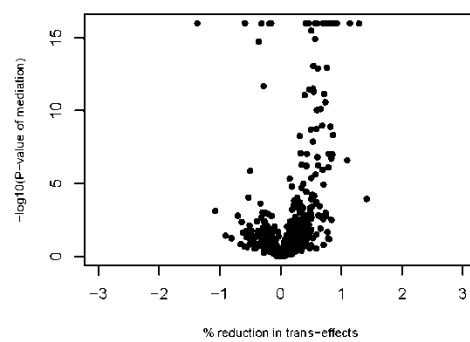

# Cells\_EBV-transformed\_lymphocytes

A. Adjust Known Covariates Only

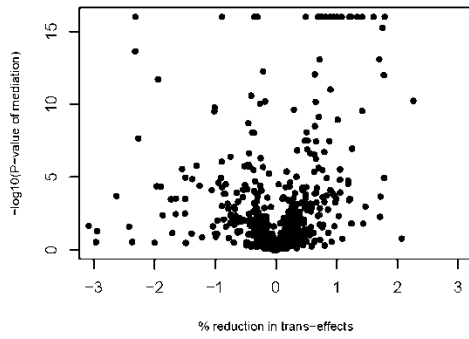

B. Adjust Known + All PEER

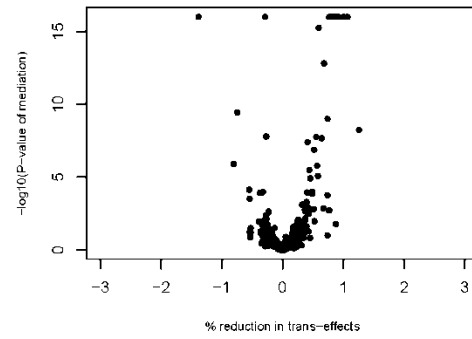

C. Adjust Known + Adaptively Selected PEER

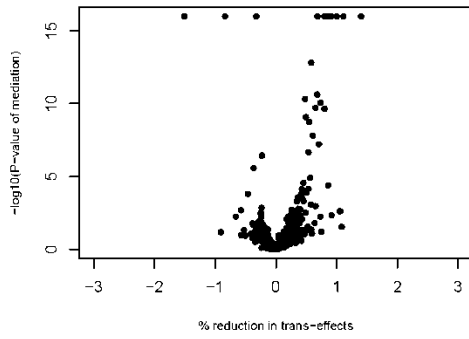

D. Adjust Known Covariates + Adaptively Selected PC (Final Analysis)

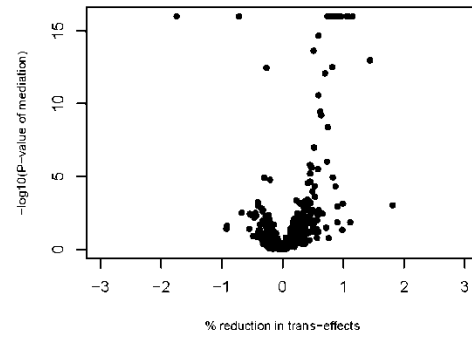

# Cells\_Transformed\_fibroblasts

A. Adjust Known Covariates Only

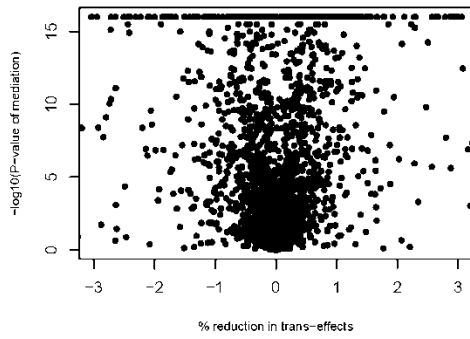

B. Adjust Known + All PEER

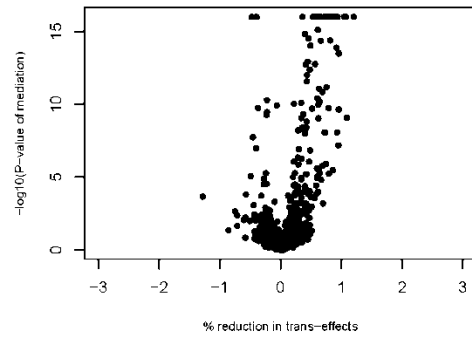

C. Adjust Known + Adaptively Selected PEER

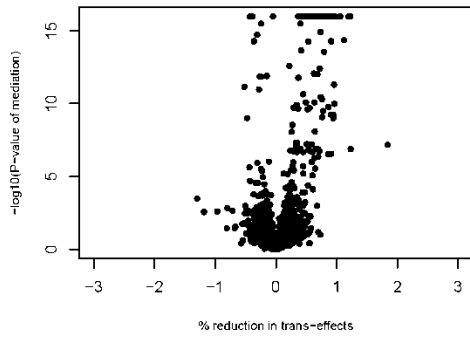

D. Adjust Known Covariates + Adaptively Selected PC (Final Analysis)

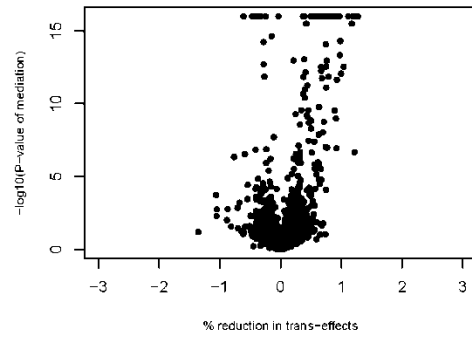

## Colon\_Sigmoid

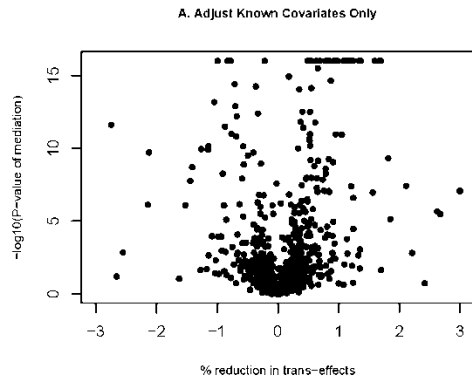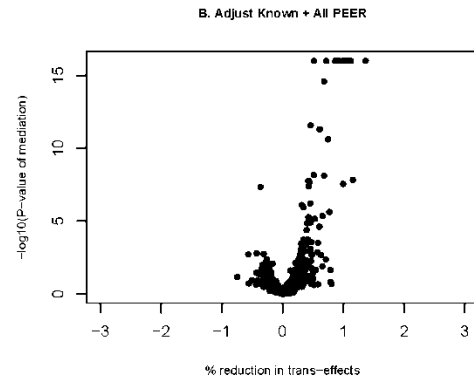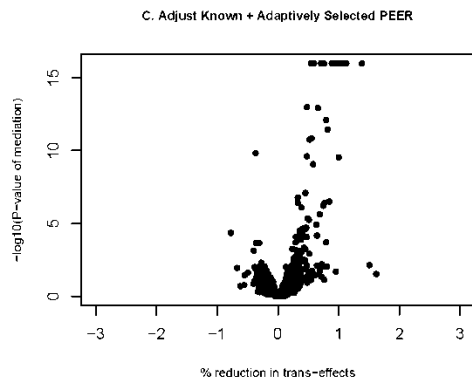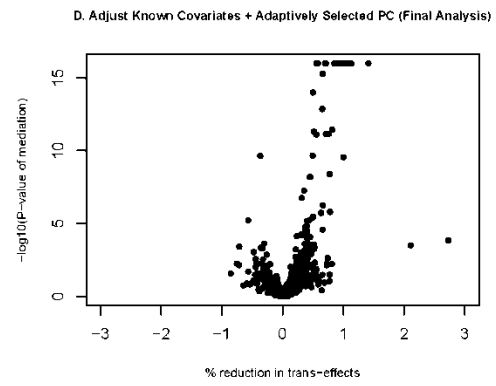

## Colon\_Transverse

A. Adjust Known Covariates Only

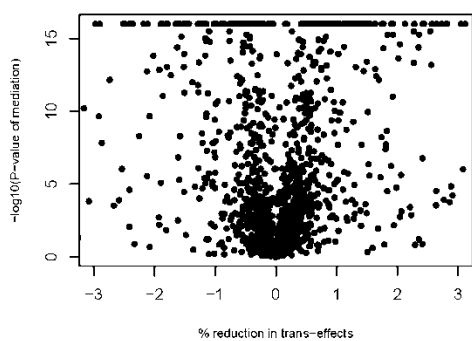

B. Adjust Known + All PEER

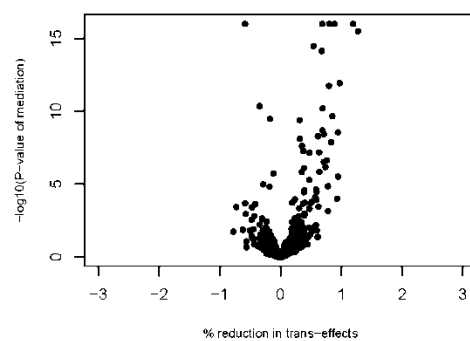

C. Adjust Known + Adaptively Selected PEER

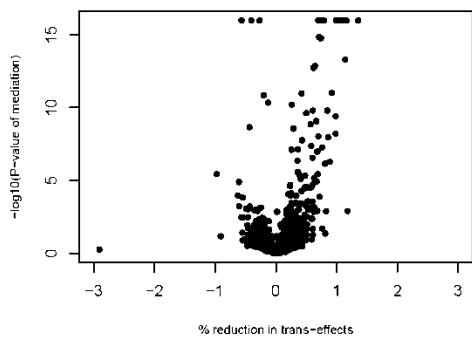

D. Adjust Known Covariates + Adaptively Selected PC (Final Analysis)

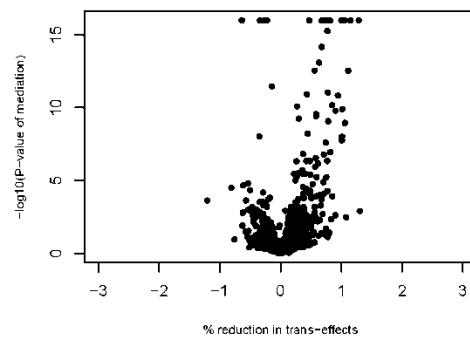

## Esophagus\_Gastroesophageal\_Junction

A. Adjust Known Covariates Only

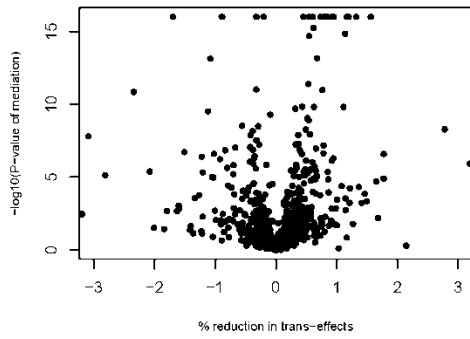

B. Adjust Known + All PEER

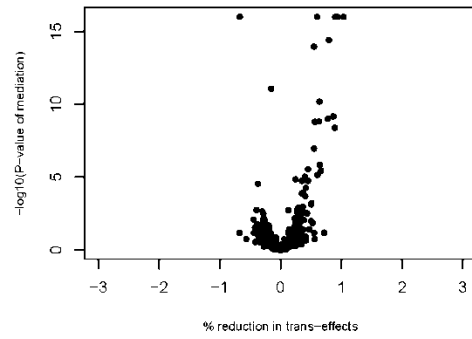

C. Adjust Known + Adaptively Selected PEER

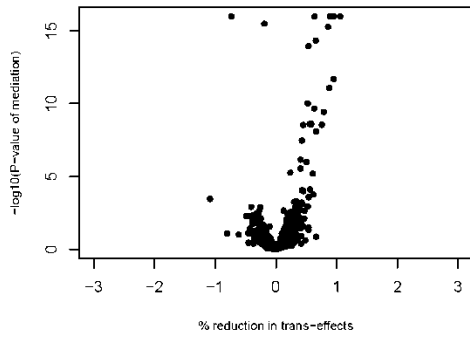

D. Adjust Known Covariates + Adaptively Selected PC (Final Analysis)

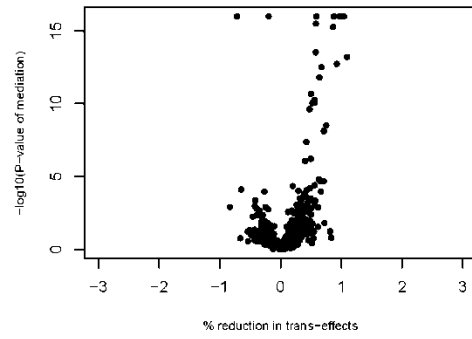

Esophagus\_Mucosa

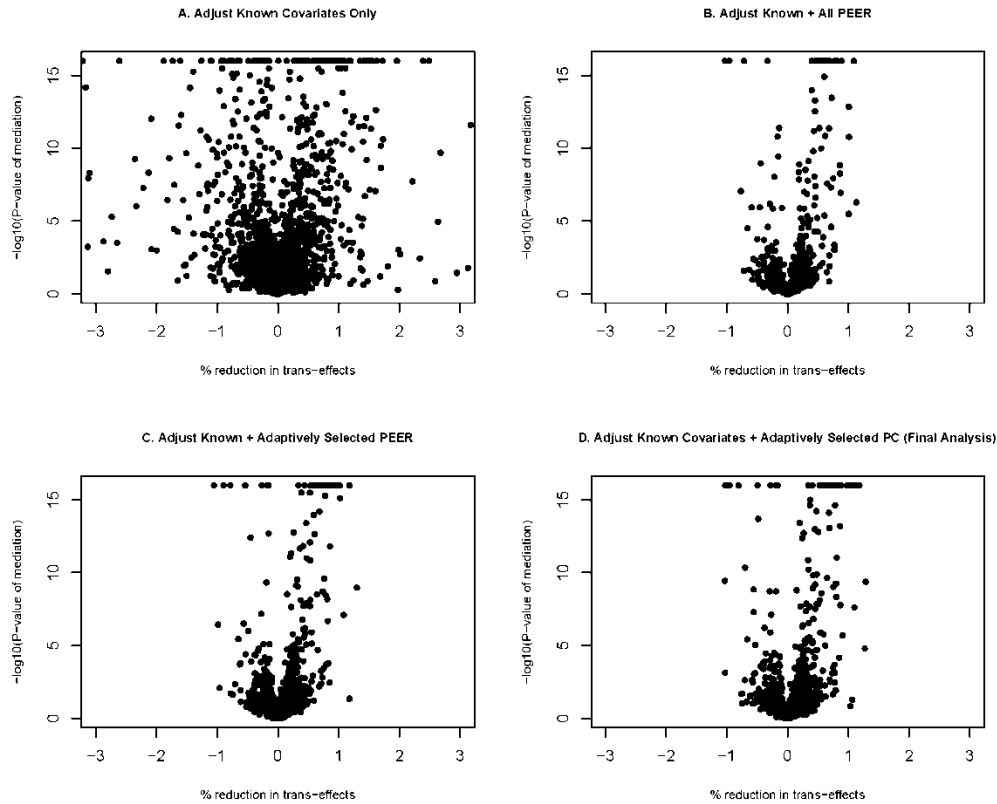



## Esophagus\_Muscularis

A. Adjust Known Covariates Only

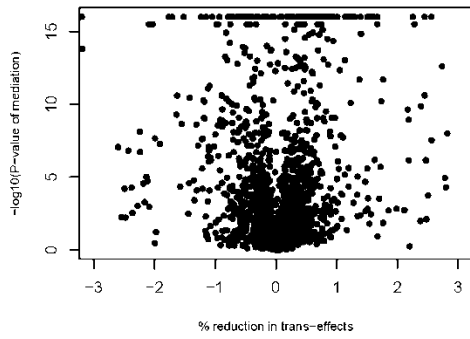

B. Adjust Known + All PEER

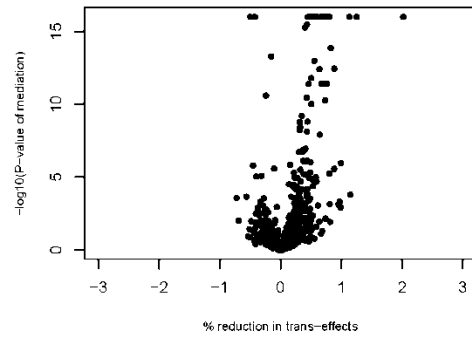

C. Adjust Known + Adaptively Selected PEER

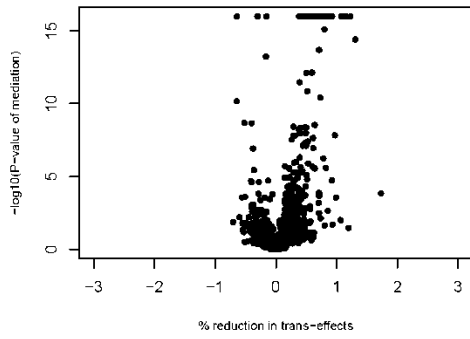

D. Adjust Known Covariates + Adaptively Selected PC (Final Analysis)

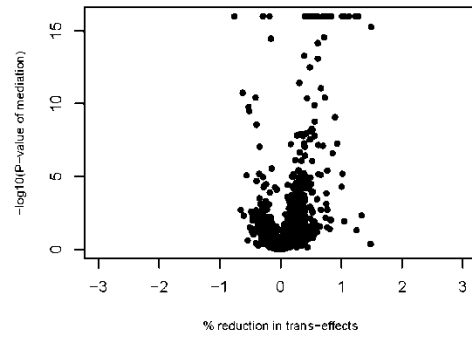

## Heart\_Atrial\_Appendage

A. Adjust Known Covariates Only

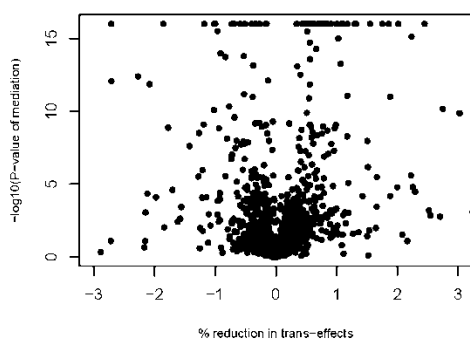

B. Adjust Known + All PEER

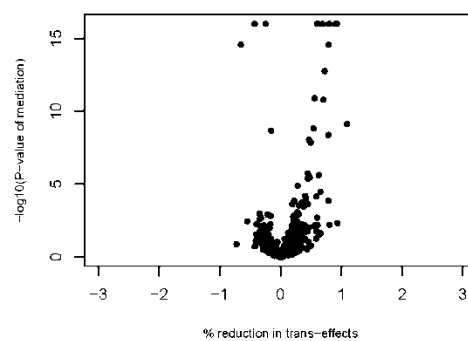

C. Adjust Known + Adaptively Selected PEER

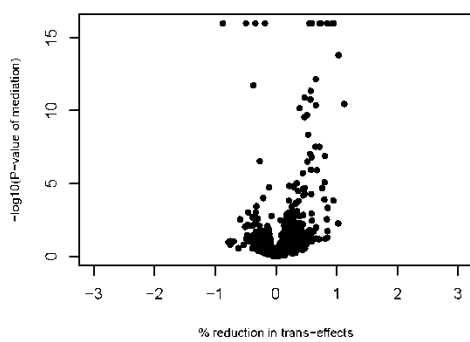

D. Adjust Known Covariates + Adaptively Selected PC (Final Analysis)

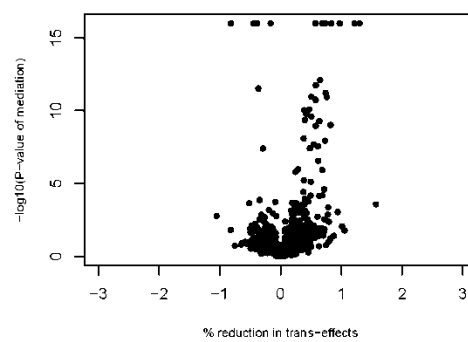

## Heart\_Left\_Ventricle

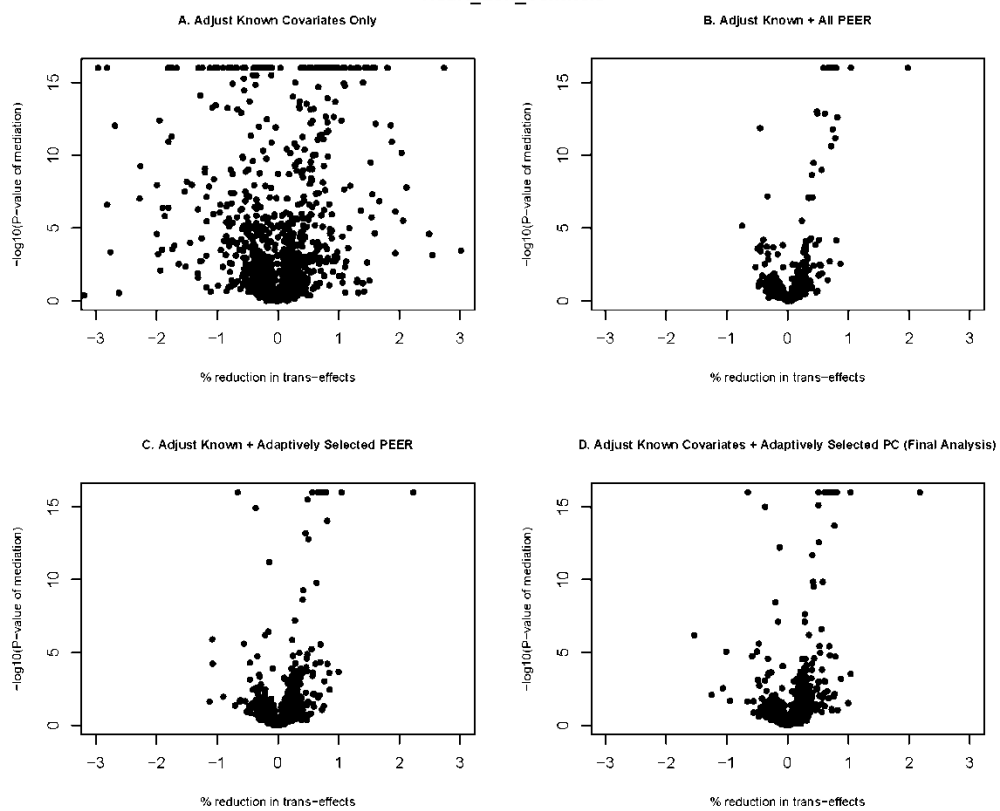

## Liver

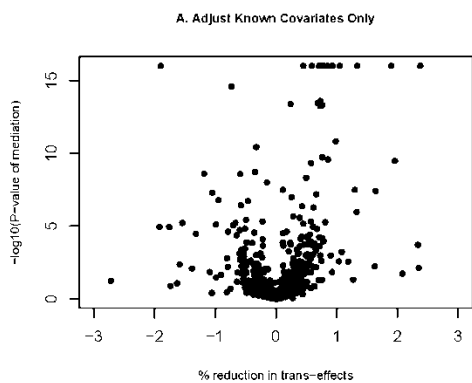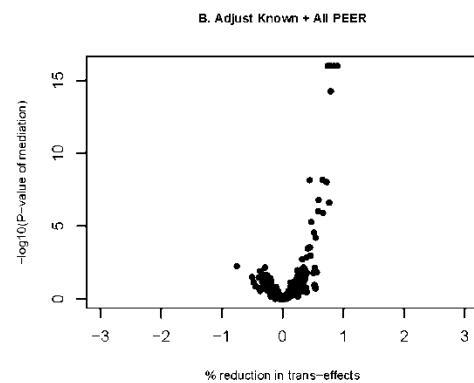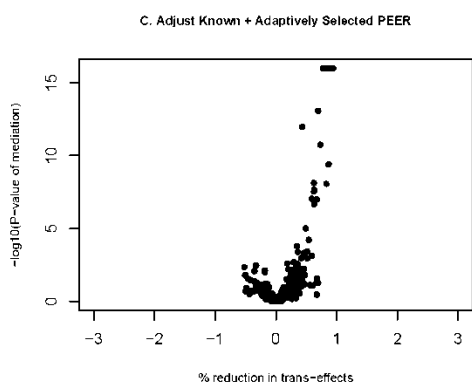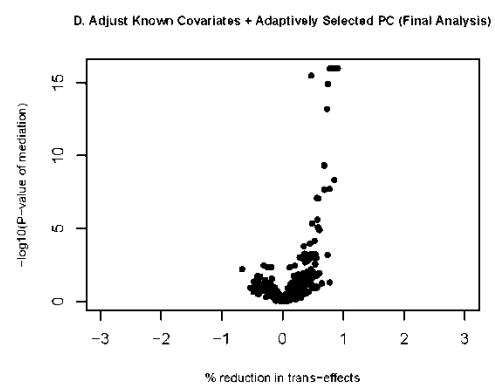

## Lung

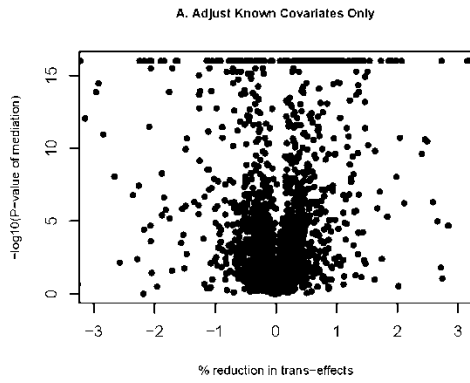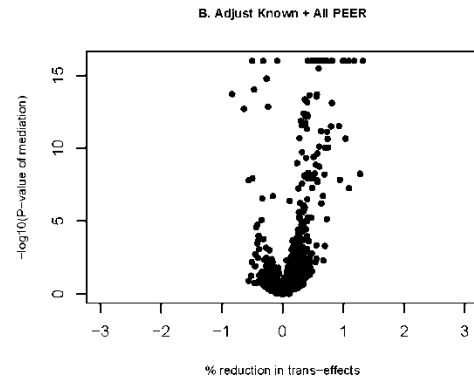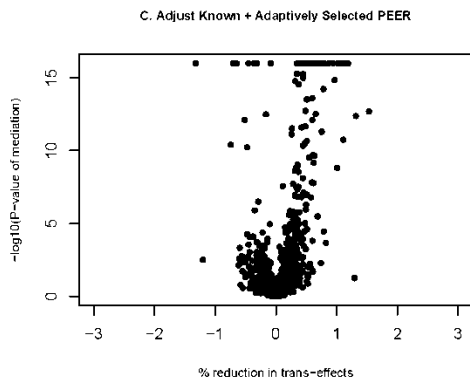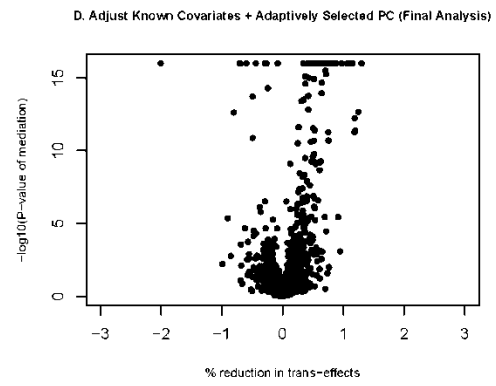

## Muscle\_Skeletal

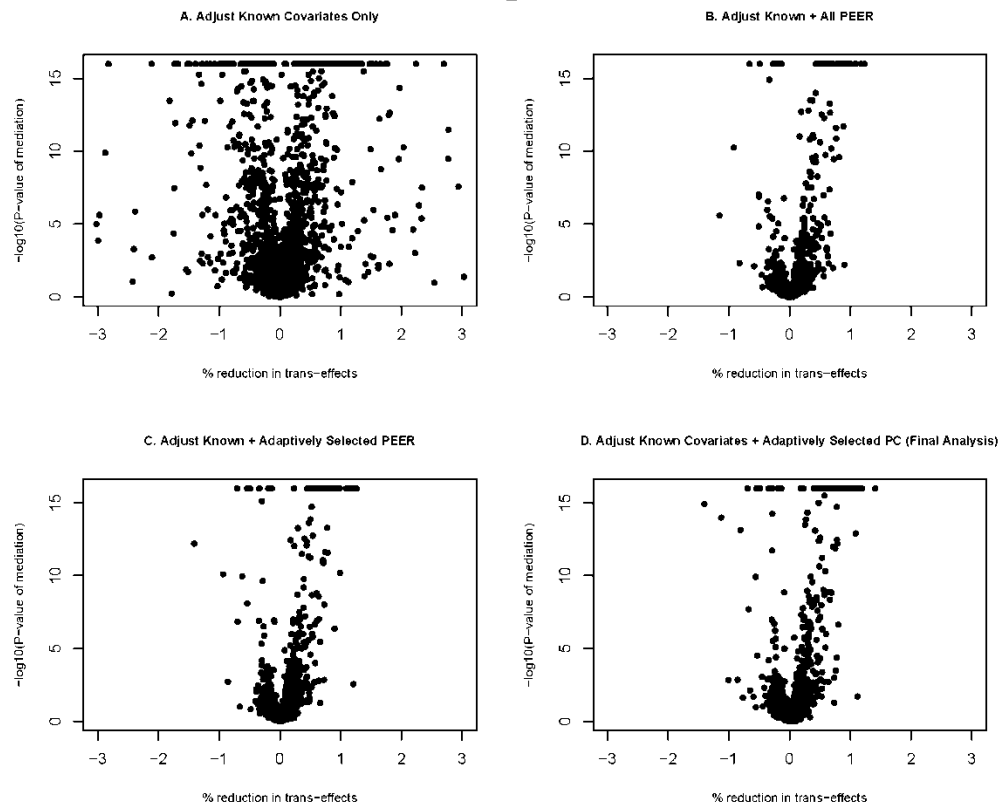

# Nerve\_Tibial

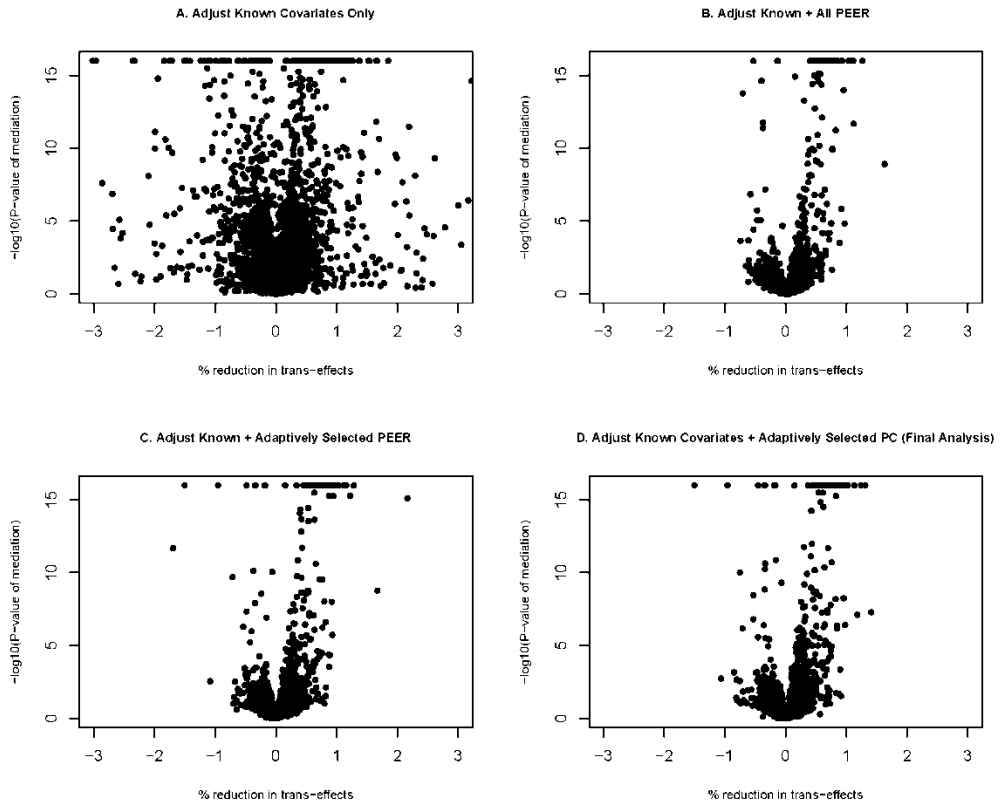

## Ovary

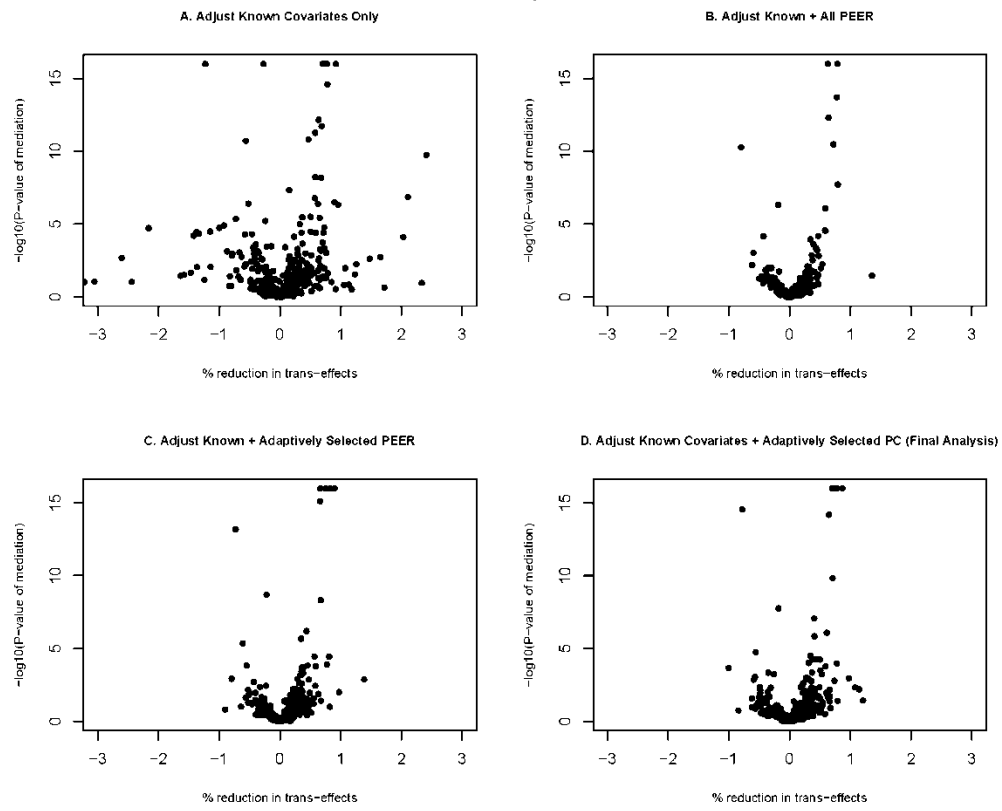



## Pancreas

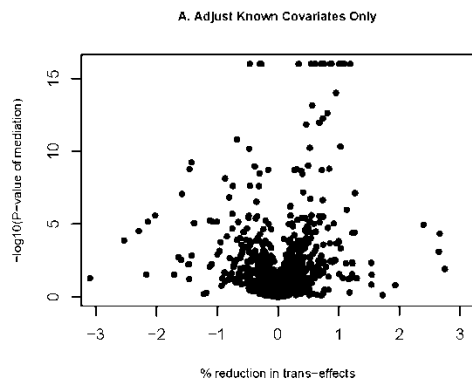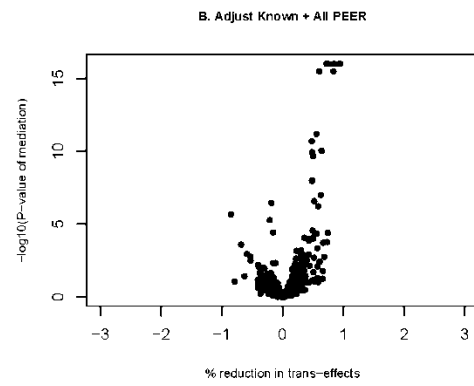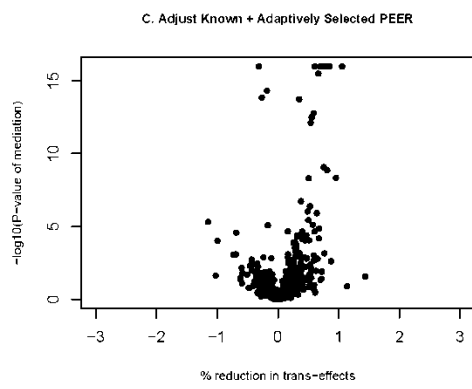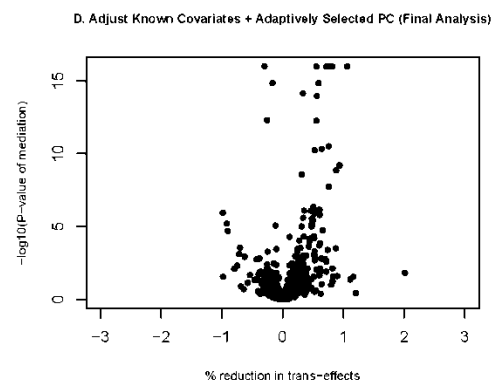

Pituitary

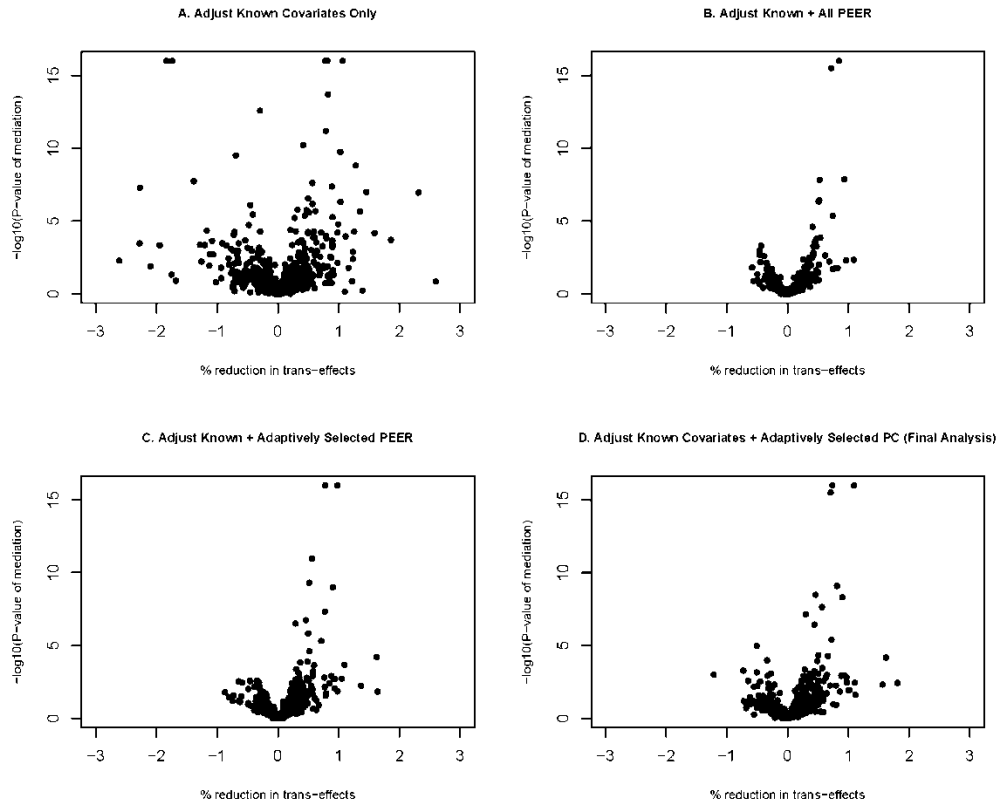

Prostate

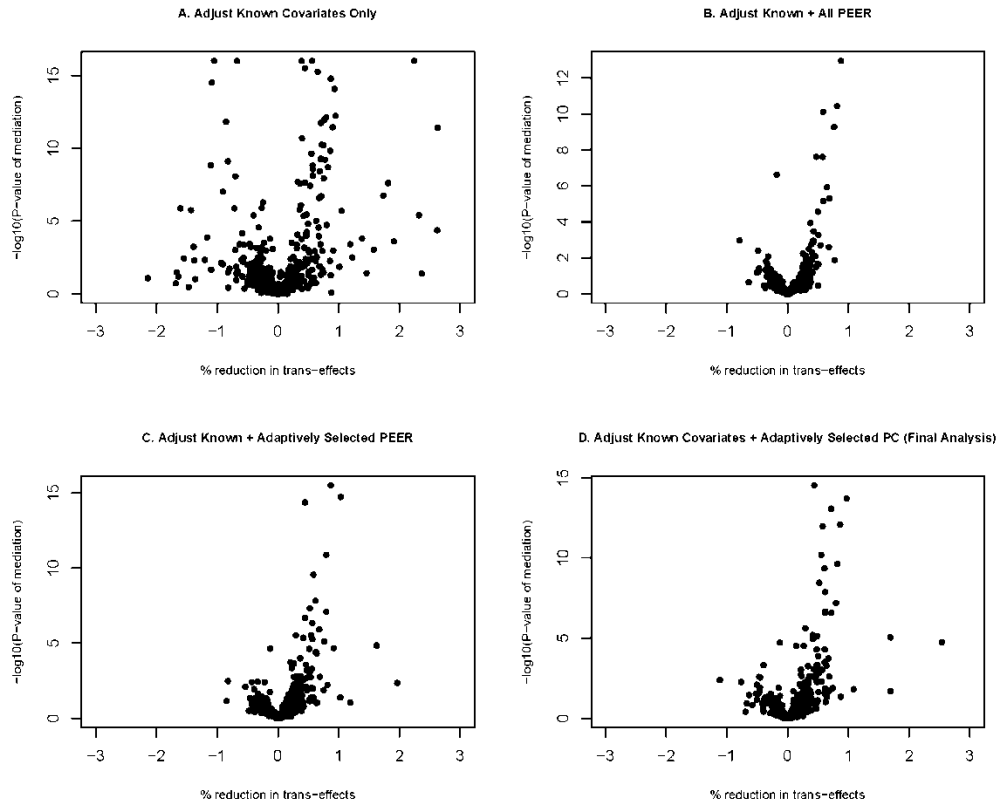

# Skin\_Not\_Sun\_Exposed\_Suprapubic

A. Adjust Known Covariates Only

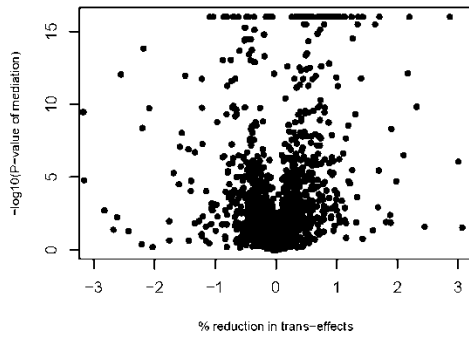

B. Adjust Known + All PEER

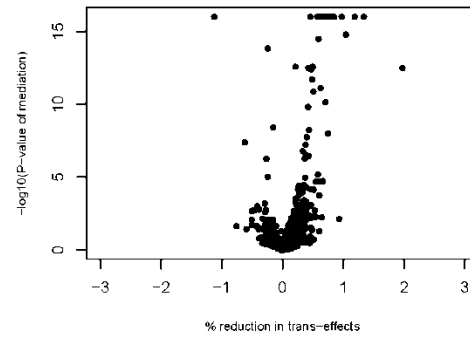

C. Adjust Known + Adaptively Selected PEER

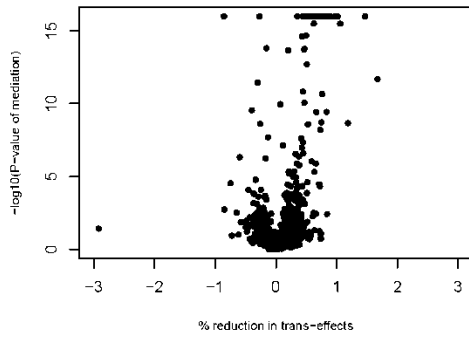

D. Adjust Known Covariates + Adaptively Selected PC (Final Analysis)

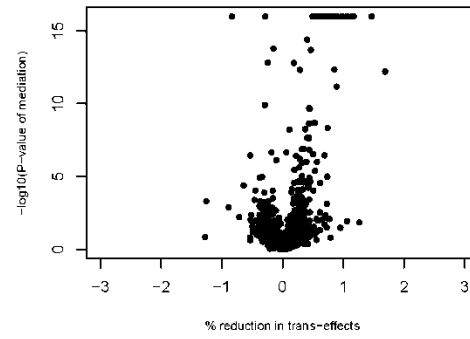

# Skin\_Sun\_Exposed\_Lower\_leg

A. Adjust Known Covariates Only

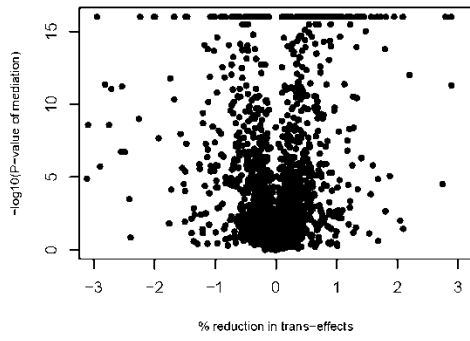

B. Adjust Known + All PEER

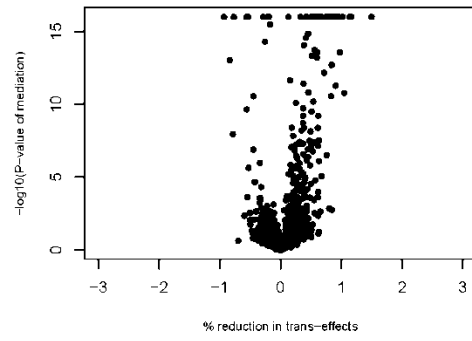

C. Adjust Known + Adaptively Selected PEER

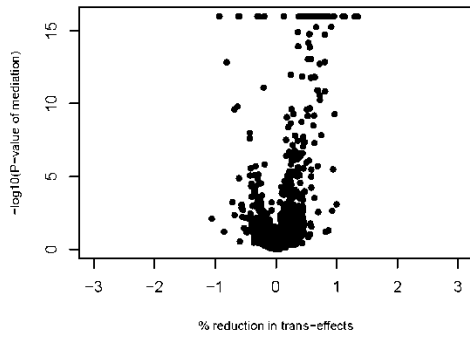

D. Adjust Known Covariates + Adaptively Selected PC (Final Analysis)

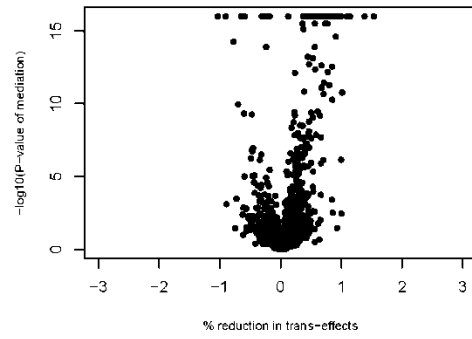

# Small\_Intestine\_Terminal\_Ileum

A. Adjust Known Covariates Only

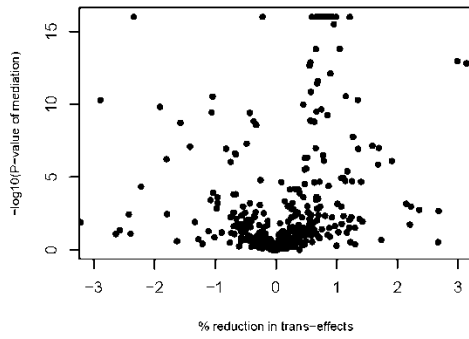

B. Adjust Known + All PEER

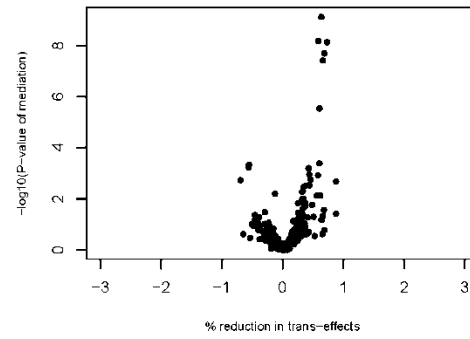

C. Adjust Known + Adaptively Selected PEER

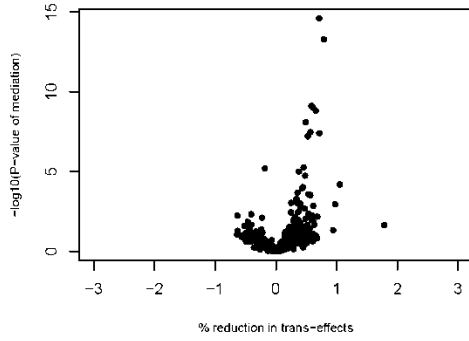

D. Adjust Known Covariates + Adaptively Selected PC (Final Analysis)

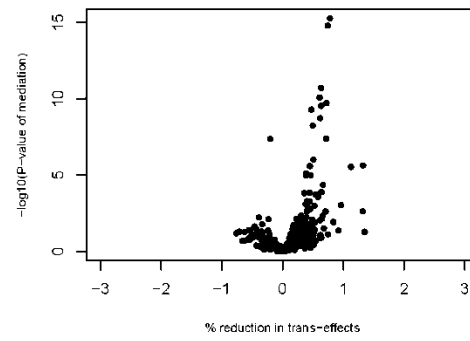

## Spleen

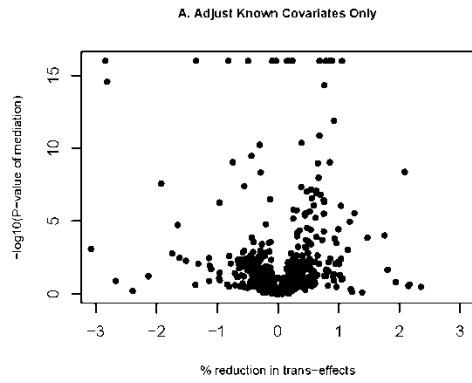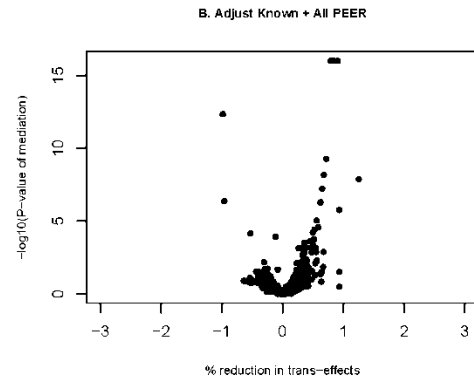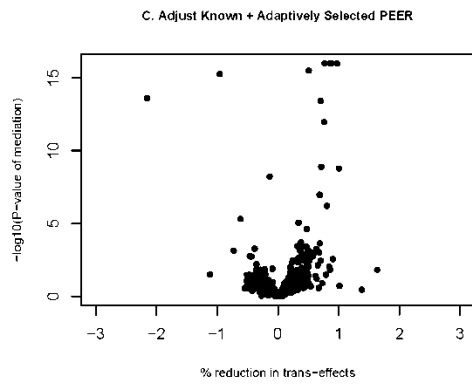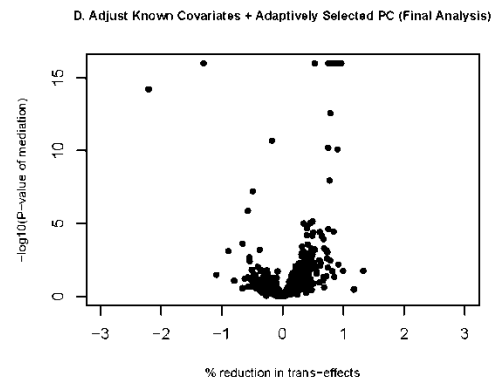

Stomach

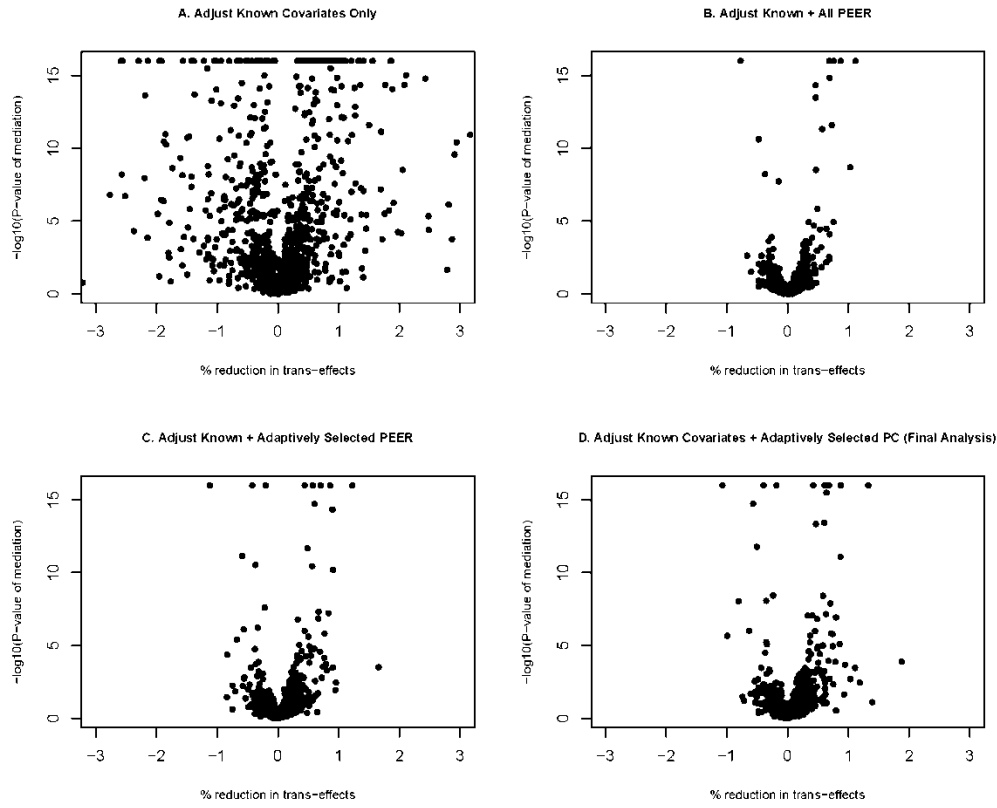



## Testis

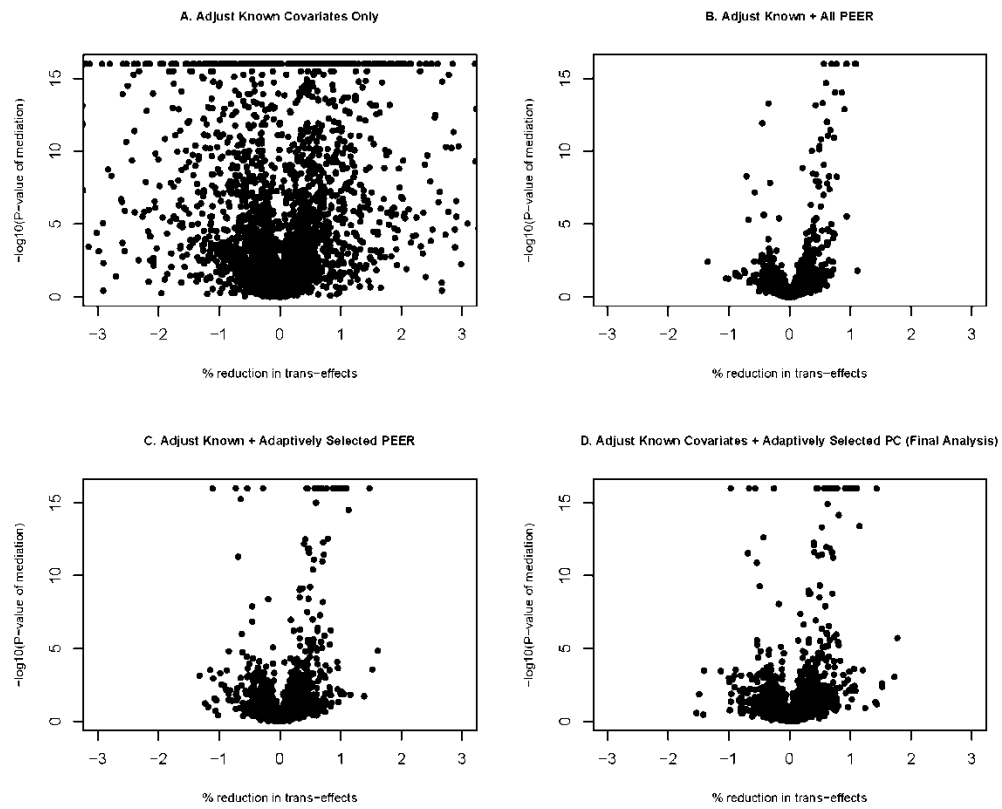

## Thyroid

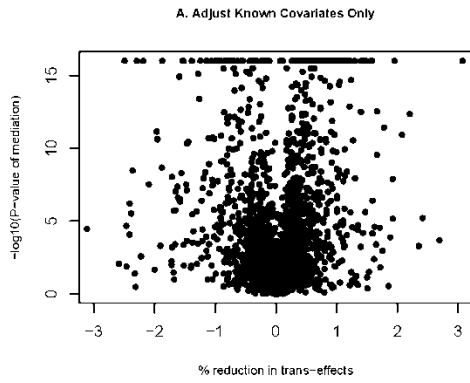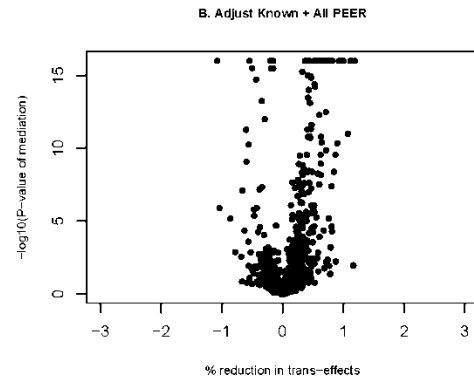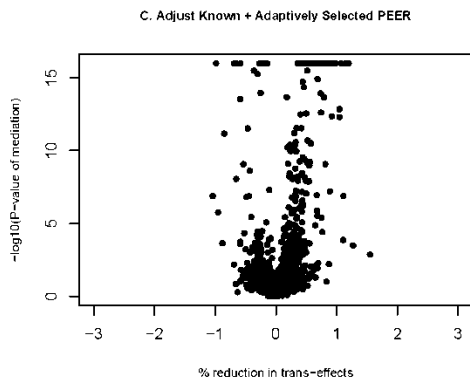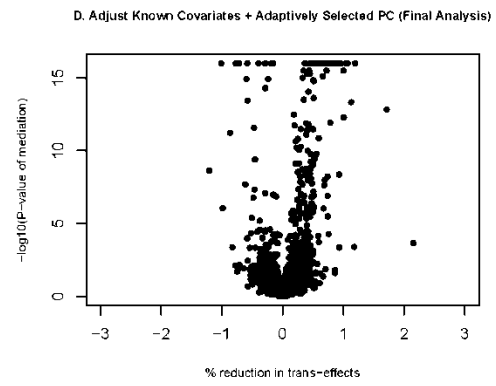

## Uterus

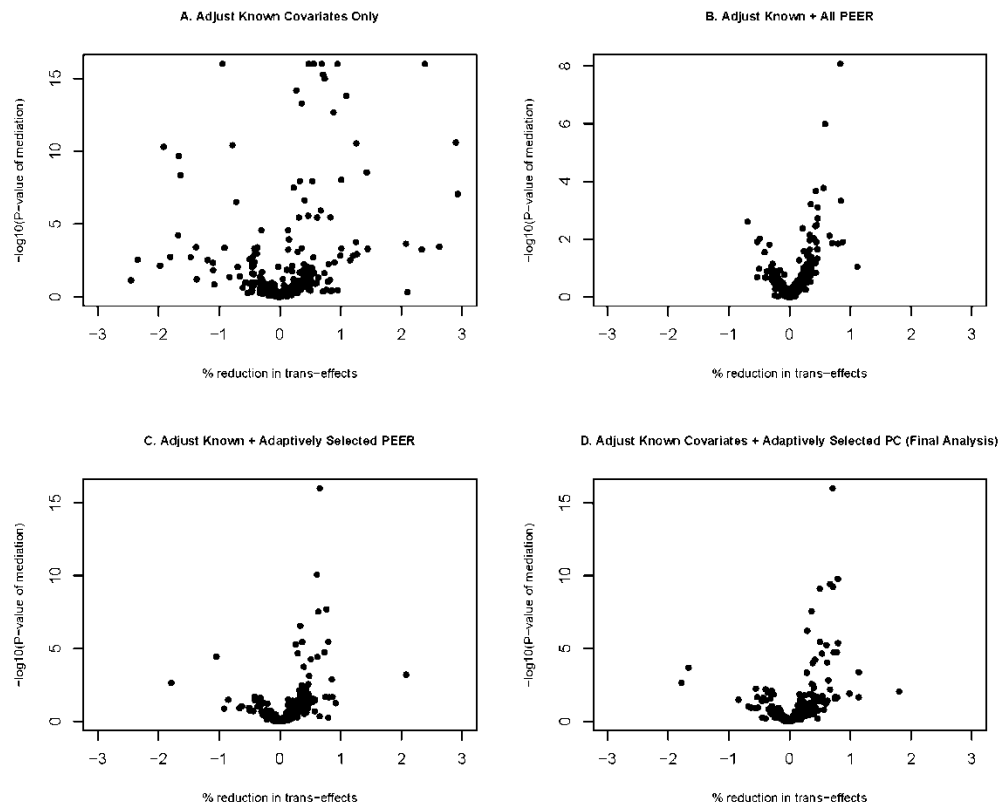

## Vagina

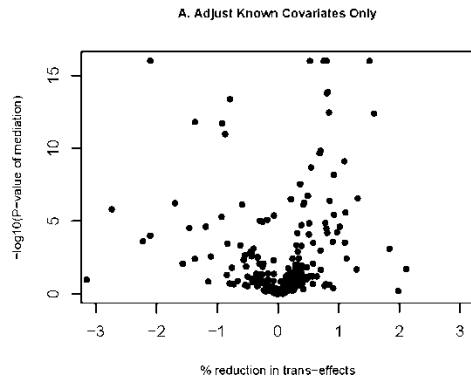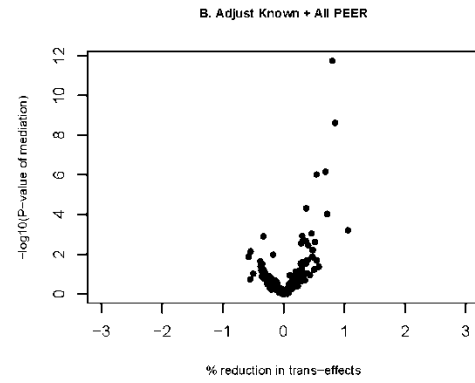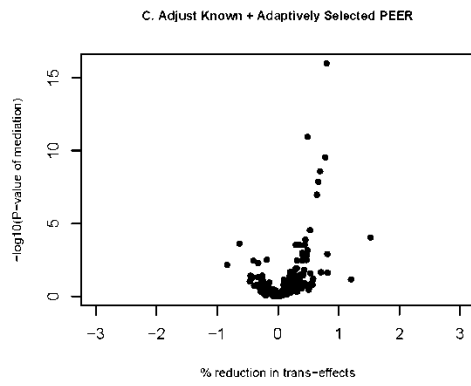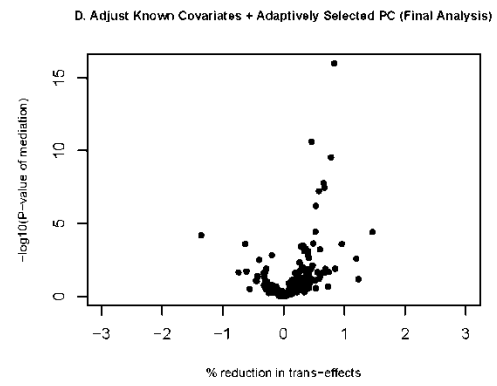

## Whole\_Blood

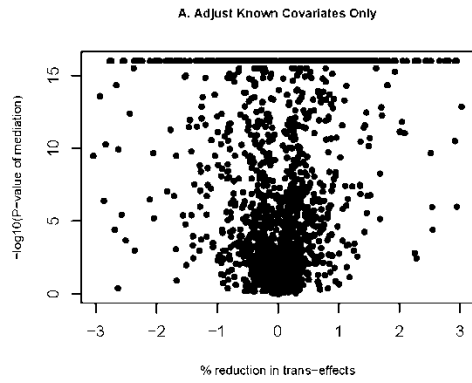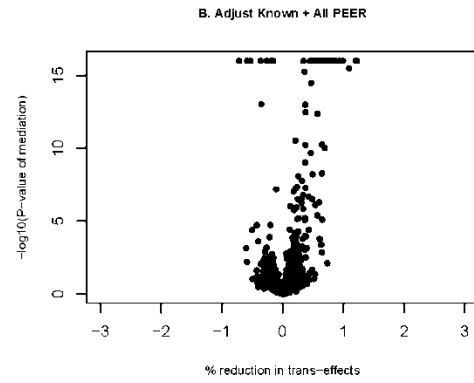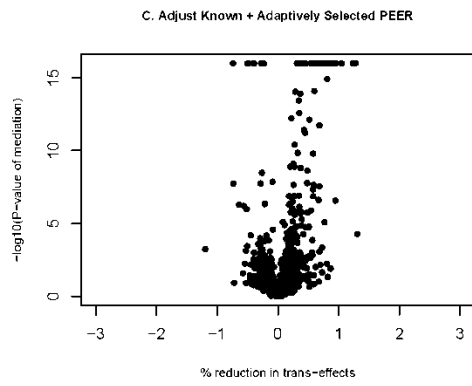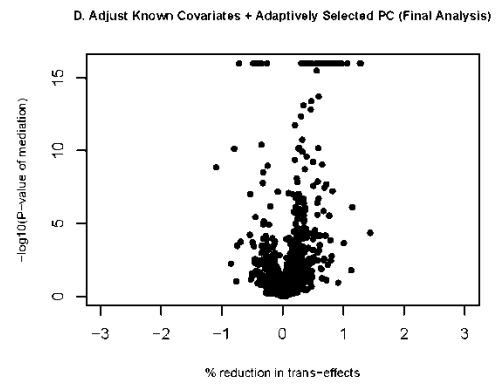

**Supplemental Figure S2.** Histograms of mappability for cis-genes that appear to mediate a trans-eQTL (mediation  $P < 0.05$ ), stratified by number of trans targets and number of tissues. On the left side, A shows all cis-mediators, B shows those with  $>2$  trans targets, and C shows those  $>4$  trans targets. On the right side, D shows all trans targets of cis-mediators, E contains only the cis-mediators showing evidence of mediation in  $>2$  tissues, and F contains only the cis-mediators showing evidence of mediation in  $>3$  tissues.

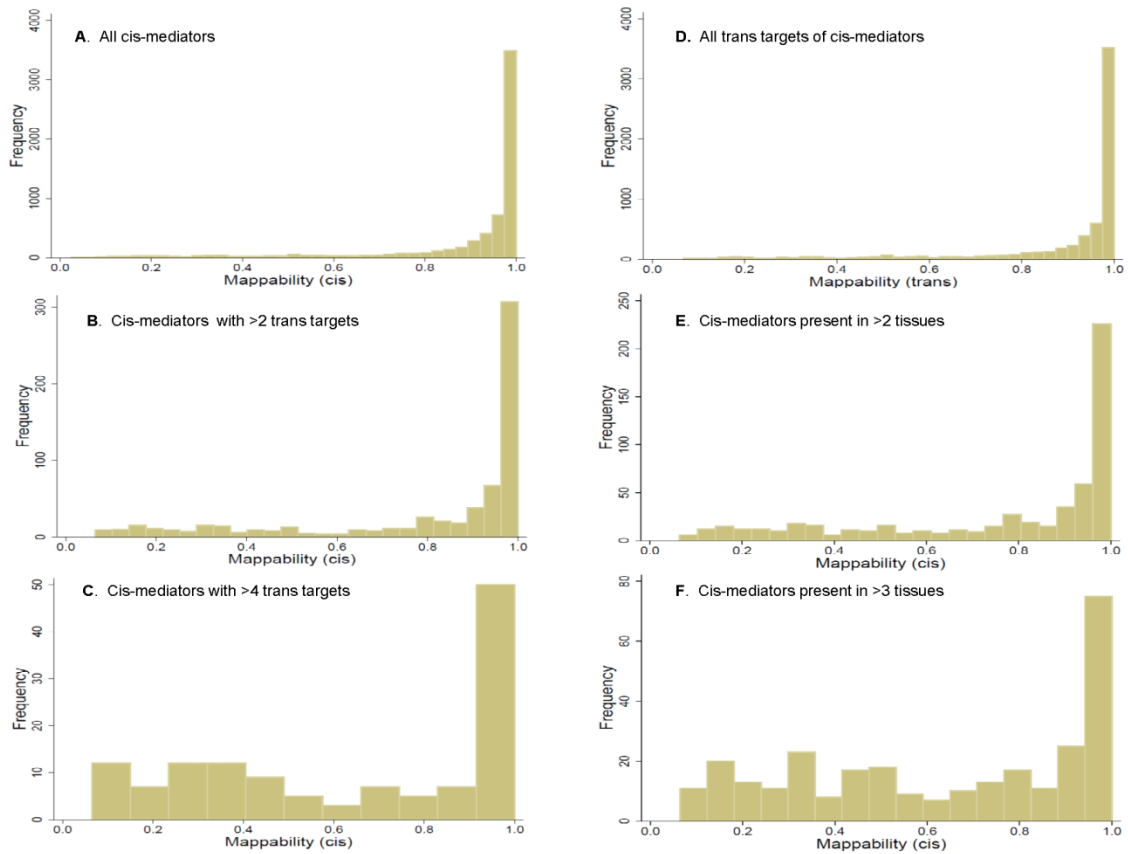

**Supplemental Figure S3.** Alignment of *IFI44* (query) and *IFI44L* (Sbjct) mRNA sequences shows two regions of similarity. Results obtained from NCBI BLAST (<https://blast.ncbi.nlm.nih.gov/Blast.cgi>).

| Range 1: 768 to 1521 <a href="#">GenBank</a> <a href="#">Graphics</a> |                                                               |              |            |           | ▼ Next Match ▲ Previous Match |  |
|-----------------------------------------------------------------------|---------------------------------------------------------------|--------------|------------|-----------|-------------------------------|--|
| Score                                                                 | Expect                                                        | Identities   | Gaps       | Strand    |                               |  |
| 269 bits(298)                                                         | 5e-70                                                         | 527/767(69%) | 29/767(3%) | Plus/Plus |                               |  |
| Query 659                                                             | CCATATGGATCCCTGGTTCAACAAATACGAATTCTGCTGCTGGGTCCAATTGGAGCTGGG  |              |            |           | 718                           |  |
| Sbjct 768                                                             | CCCTATGCAGACTTGGTTTCAGAAATTCGTATTCTTTTGGTGGGTCCAGTTGGGTCTGGA  |              |            |           | 827                           |  |
| Query 719                                                             | AAGTCCAGCTTTTTCAACTCAGTGAGGTCTGTTTTCCAAGGGCATGTAAACGCAICAGGCT |              |            |           | 778                           |  |
| Sbjct 828                                                             | AAGTCCAGTTTTCAAATCAGTCAAGTCTATTTTTCATGGCCATGTGACTGGCCAAGCC    |              |            |           | 887                           |  |
| Query 779                                                             | TTGGTGGGCACTAATACAACCTGGGATATCTGAGAAGTATAGGACATACTCTATTAGAGAC |              |            |           | 838                           |  |
| Sbjct 888                                                             | GTAGTGGGTCTGATATCACCAGCATAACCGAGCGGTATAGGATATATTCTGTTAAAGAT   |              |            |           | 947                           |  |
| Query 839                                                             | GGGAAAGATGGCAAATACCTGCCGTTTATTCTGTGTGACTCACTGGGGCTGAGTGAGAAA  |              |            |           | 898                           |  |
| Sbjct 948                                                             | GGAAAAATGGAAATCTCTGCCATTATGTTGTGTGACACTATGGGGCTAGATGGGGCA     |              |            |           | 1007                          |  |
| Query 899                                                             | GAAGGCG---GCCTGTGCAGGGATGACATATTCTATATCTTGAACGGTAACATTGCTGAT  |              |            |           | 955                           |  |
| Sbjct 1008                                                            | GAAGGAGCAGGACTGTGCAITGGATGACATTCACACATCTTAAAGGTTGTATGCCAGAC   |              |            |           | 1067                          |  |
| Query 956                                                             | AGATACCAGTTTAAT-CCCATGGAATCAATCAAATTAATC--ATCATGACTACATTGAT   |              |            |           | 1012                          |  |
| Sbjct 1068                                                            | AGATATCAGTTTAATCCCGT-----AAACCAATTACACCTGAGCAIT-CTACTTTTAT    |              |            |           | 1120                          |  |
| Query 1013                                                            | ----ICCCATCGCTGAAGGACAGAATTCATTGTGTGGCATTGTATTTGATGCCAGCTC    |              |            |           | 1068                          |  |
| Sbjct 1121                                                            | CACCTCTCCATCTCTGAAGGACAGGATTCACTGTGTGGCTTATGTCTTAGACATCAACTC  |              |            |           | 1180                          |  |
| Query 1069                                                            | TATTCAATACTTCTCTCTCAGATGATAGTAAAGATCAAAAGAATTGGAAGGGAGTTGGT   |              |            |           | 1128                          |  |
| Sbjct 1181                                                            | TATTGACAACTCTCTACTCTAAATGTTGGCAAAAGTGAAGCAAGTTCACAAAGAAATATT  |              |            |           | 1240                          |  |
| Query 1129                                                            | AAACGCTGGTGTGGTACATGTGGCTTIGCTCCTCATGTGGATAGCATGGA-TTIGATT    |              |            |           | 1187                          |  |
| Sbjct 1241                                                            | AAACTGTGGTATAGCATATGTGGCCTTGCTTACTAAAGTGGAT-GATTGCAGTGAGGTTT  |              |            |           | 1299                          |  |
| Query 1188                                                            | CAAAAGGTGACCTTATAGAAATAGAG-AGATGTGAGCCTGTGAGGTCCAAGCTAG---AG  |              |            |           | 1243                          |  |
| Sbjct 1300                                                            | TTCAAGACAACCTTTTAAACAT-GAGTAGATCTATGACT---TCTCAAAGCCGGGTCAT   |              |            |           | 1354                          |  |
| Query 1244                                                            | GAA-GTCCAAAGAAAACCTTGGATTGCTCTTTCTGACATCTCGGTGGTTAGCAATTATTC  |              |            |           | 1302                          |  |
| Sbjct 1355                                                            | GAATGTCCATAAAATGCTAGGCATTCTATTTCCAATATTTGATGGTTGGAAATTATGC    |              |            |           | 1414                          |  |
| Query 1303                                                            | CTCTGAGTGGGAGCTGGACCCTGTAAGGATGTTCTAATTCTTCTGCTCTGAGACGAAT    |              |            |           | 1362                          |  |
| Sbjct 1415                                                            | TTCAGATTTGGAACCTGGACCCCATGAAGGATATCTCATCCTCTCTGCACTGAGGCAGAT  |              |            |           | 1474                          |  |
| Query 1363                                                            | GCTATGGGCTGCAGATGACTTCTTAGAGGATTTGCCTTTTGAGCAAA               |              |            |           | 1409                          |  |
| Sbjct 1475                                                            | GCTGCGGGCTGCAGATGATTTTTAGAAGATTTGCCCTCTTGAGGAAA               |              |            |           | 1521                          |  |

| Range 2: 186 to 388 <a href="#">GenBank</a> <a href="#">Graphics</a> |                                                              |              |           |           | ▼ Next Match ▲ Previous Match ▲ First Match |  |
|----------------------------------------------------------------------|--------------------------------------------------------------|--------------|-----------|-----------|---------------------------------------------|--|
| Score                                                                | Expect                                                       | Identities   | Gaps      | Strand    |                                             |  |
| 59.0 bits(64)                                                        | 2e-06                                                        | 137/205(67%) | 4/205(1%) | Plus/Plus |                                             |  |
| Query 110                                                            | AACAGATCAAGAAGTATGGCAGTGACAACTCGTTTGACATGGTTGCACGAAAAGATCCTG |              |           |           | 169                                         |  |
| Sbjct 186                                                            | AACAGATATAGAACATGGAAAGTGACAAACAGATTGACATGGAATGATGAAAATCATCTG |              |           |           | 245                                         |  |
| Query 170                                                            | CAAAATCAITTTGGAGGGAAGCGGCTT--AGCCTTCTCTATAAGGGTAGTGTCATGGAT  |              |           |           | 227                                         |  |
| Sbjct 246                                                            | CGCAAGCTGCTTGGAA--ATGTTTCTTTGAGTCTTCTCTATAAGTCTAGTGTTCATGGAG |              |           |           | 303                                         |  |
| Query 228                                                            | TCCGTAATGGAGTTTGTCTTGACAGATGTTGTAATCAAGGGCCTACTCTAACAGTGATTT |              |           |           | 287                                         |  |
| Sbjct 304                                                            | GTAGCATTGAAGATATGGTTGAAAGATGCAGCCGTCAGGGATGTACTATAACAATGGCTT |              |           |           | 363                                         |  |
| Query 288                                                            | ATAGTGAAGATCAATATTATTGGAGC                                   |              |           |           | 312                                         |  |
| Sbjct 364                                                            | ACATTGATTACAATATGATTGTAGC                                    |              |           |           | 388                                         |  |
