# Supplementary material for: Identifying cis -mediators for trans -eQTLs across many human tissues using genomic mediation analysis
Source: HighWire-hosted journal article supplement (doi:10.1101/gr.216754.116), 2017-10-11
Supplement: Supplemental_Table_S2.xlsx [file Supplemental_Table_S2.xlsx]

## Sheet: Supplemental_Table_S2
Supplemental Table 2. A complete list of all instances of cis-mediation of trans-eQTLs with a mediation P-value <0.1 (16,648 trios), including trios containing transcripts with low mappability.
Tissue	cisSNP	cisGene.EnsemblID	cisGene.Symbol	cis_mappability	transGene.EnsemblID	transGene.Symbol	trans_mappability	Mediation.Pvalue
Adipose_Subcutaneous	12_56435929_C_G_b37	ENSG00000197728.5	RPS26	0.83037	ENSG00000196656.6		0.185662	0.0563777
Adipose_Subcutaneous	10_51585752_C_T_b37	ENSG00000174194.11	AGAP8	0.183724	ENSG00000188234.9	AGAP4	0.111497	0.00369767
Adipose_Subcutaneous	3_39452123_G_A_b37	ENSG00000168028.9	RPSA	0.787579	ENSG00000183298.4	RPSAP19	0.153558	0.00353683
Adipose_Subcutaneous	16_2014031_C_G_b37	ENSG00000140988.11	RPS2	0.67028	ENSG00000240342.2	RPS2P5	0.15602	0
Adipose_Subcutaneous	19_8403481_T_C_b37	ENSG00000186994.7	KANK3	0.994951	ENSG00000227097.4	RPS28P7	0.340555	0.011338
Adipose_Subcutaneous	10_51807210_T_C_b37	ENSG00000099290.11	FAM21A	0.306151	ENSG00000152726.14		0.283338	0.00798661
Adipose_Subcutaneous	16_89620148_A_G_b37	ENSG00000167526.9	RPL13	0.888324	ENSG00000215030.4	RPL13P12	0.743772	0
Adipose_Subcutaneous	7_128281256_G_A_b37	ENSG00000271529.1	CICP14	0.138156	ENSG00000234419.1	CICP13	0.21686	4.44089e-16
Adipose_Subcutaneous	7_128281256_G_A_b37	ENSG00000243679.1	RP11-274B21.3	0.345899	ENSG00000234419.1	CICP13	0.21686	0.00988023
Adipose_Subcutaneous	19_8405107_C_T_b37	ENSG00000233927.4	RPS28	0.949371	ENSG00000237039.1	AC018738.2	0.285539	0
Adipose_Subcutaneous	17_18548418_A_C_b37	ENSG00000154874.10	CCDC144B	0.353022	ENSG00000188933.10	USP32P1	0.359227	0
Adipose_Subcutaneous	19_8405107_C_T_b37	ENSG00000233927.4	RPS28	0.949371	ENSG00000227097.4	RPS28P7	0.340555	0
Adipose_Subcutaneous	7_128251667_A_G_b37	ENSG00000243302.3	RP11-274B21.2	0.160049	ENSG00000234419.1	CICP13	0.21686	6.32509e-09
Adipose_Subcutaneous	7_128209858_C_T_b37	ENSG00000230715.2	RP11-274B21.4	0.292784	ENSG00000234419.1	CICP13	0.21686	2.34122e-07
Adipose_Subcutaneous	16_2014031_C_G_b37	ENSG00000140988.11	RPS2	0.67028	ENSG00000189343.6	RPS2P46	0.252698	0
Adipose_Subcutaneous	11_8010307_T_G_b37	ENSG00000175390.8	EIF3F	0.908951	ENSG00000233426.2	EIF3FP3	0.718878	0
Adipose_Subcutaneous	7_128281256_G_A_b37	ENSG00000271529.1	CICP14	0.138156	ENSG00000233771.2	CICP5	0.159844	3.72396e-06
Adipose_Subcutaneous	5_177265164_G_A_b37	ENSG00000170089.11	RP11-423H2.1	0.566867	ENSG00000051596.5	THOC3	0.506533	0.0510039
Adipose_Subcutaneous	6_33239869_C_T_b37	ENSG00000231500.2	RPS18	0.870495	ENSG00000242299.1		0.523809	2.38121e-09
Adipose_Subcutaneous	7_128281256_G_A_b37	ENSG00000243679.1	RP11-274B21.3	0.345899	ENSG00000253326.2	RP11-261C10.7	0.34244	2.97581e-08
Adipose_Subcutaneous	6_26621379_T_A_b37	ENSG00000181315.6	ZNF322	0.526872	ENSG00000188801.8	ZNF322P1	0.514348	0.0561756
Adipose_Subcutaneous	2_132236310_T_G_b37	ENSG00000163040.10	CCDC74A	0.552617	ENSG00000227632.2	AC018804.6	0.564576	0.00521597
Adipose_Subcutaneous	7_128318168_A_G_b37	ENSG00000229413.1	AC018638.1	0.163782	ENSG00000253326.2	RP11-261C10.7	0.34244	1.58869e-07
Adipose_Subcutaneous	7_128209858_C_T_b37	ENSG00000230715.2	RP11-274B21.4	0.292784	ENSG00000233771.2	CICP5	0.159844	2.66502e-05
Adipose_Subcutaneous	17_44852612_A_C_b37	ENSG00000228696.4	ARL17B	0.287935	ENSG00000265218.1		0.303974	0.0138923
Adipose_Subcutaneous	16_16296488_G_A_b37	ENSG00000257381.2	MIR3179-2	0.351299	ENSG00000254681.2	PKD1P5	0.280036	0.0536738
Adipose_Subcutaneous	16_16296488_G_A_b37	ENSG00000103226.13	NOMO3	0.347829	ENSG00000254681.2	PKD1P5	0.280036	0.000805649
Adipose_Subcutaneous	16_16296488_G_A_b37	ENSG00000227827.3	RP11-958N24.2	0.279822	ENSG00000254681.2	PKD1P5	0.280036	2.19733e-06
Adipose_Subcutaneous	7_128251667_A_G_b37	ENSG00000243302.3	RP11-274B21.2	0.160049	ENSG00000233771.2	CICP5	0.159844	1.61947e-06
Adipose_Subcutaneous	17_44121579_T_C_b37	ENSG00000266918.1	RP11-798G7.8	0.210367	ENSG00000265218.1		0.303974	5.62285e-07
Adipose_Subcutaneous	17_44121579_T_C_b37	ENSG00000120071.8	KANSL1	0.979025	ENSG00000265218.1		0.303974	5.13506e-06
Adipose_Subcutaneous	12_21598701_T_C_b37	ENSG00000121350.11	PYROXD1	0.625754	ENSG00000213252.3	RP11-819M15.1	0.810877	7.08877e-07
Adipose_Subcutaneous	5_79954075_GC_G_b37	ENSG00000228716.2	DHFR	0.516943	ENSG00000188985.5	DHFRP1	0.554804	0
Adipose_Subcutaneous	7_128251667_A_G_b37	ENSG00000243302.3	RP11-274B21.2	0.160049	ENSG00000253326.2	RP11-261C10.7	0.34244	4.34612e-11
Adipose_Subcutaneous	16_16296488_G_A_b37	ENSG00000103226.13	NOMO3	0.347829	ENSG00000214940.4	NPIPA8	0.167763	0.000607748
Adipose_Subcutaneous	16_16296488_G_A_b37	ENSG00000183889.8	AC138969.4	0.146547	ENSG00000214940.4	NPIPA8	0.167763	2.25713e-07
Adipose_Subcutaneous	16_16296488_G_A_b37	ENSG00000227827.3	RP11-958N24.2	0.279822	ENSG00000214940.4	NPIPA8	0.167763	0
Adipose_Subcutaneous	16_16296488_G_A_b37	ENSG00000244257.4	PKD1P1	0.186338	ENSG00000214940.4	NPIPA8	0.167763	0.000109722
Adipose_Subcutaneous	7_128211085_G_A_b37	ENSG00000270810.1	RP11-274B21.8	1	ENSG00000233771.2	CICP5	0.159844	0.0966619
Adipose_Subcutaneous	6_153320960_T_C_b37	ENSG00000112031.11	MTRF1L	0.545717	ENSG00000180015.11	RP11-756P10.3	0.666511	4.13447e-08
Adipose_Subcutaneous	7_128273056_G_T_b37	ENSG00000242588.2	RP11-274B21.1	0.265695	ENSG00000233771.2	CICP5	0.159844	1.38606e-06
Adipose_Subcutaneous	7_128225542_C_T_b37	ENSG00000273270.1	RP11-212P7.2	0.676217	ENSG00000233771.2	CICP5	0.159844	0.000705177
Adipose_Subcutaneous	7_128209858_C_T_b37	ENSG00000230715.2	RP11-274B21.4	0.292784	ENSG00000253326.2	RP11-261C10.7	0.34244	8.03579e-13
Adipose_Subcutaneous	7_128318168_A_G_b37	ENSG00000229413.1	AC018638.1	0.163782	ENSG00000233003.3	CICP26	0.146907	0.0923288
Adipose_Subcutaneous	7_128281256_G_A_b37	ENSG00000271529.1	CICP14	0.138156	ENSG00000233003.3	CICP26	0.146907	0.0241194
Adipose_Subcutaneous	7_128281256_G_A_b37	ENSG00000243679.1	RP11-274B21.3	0.345899	ENSG00000233003.3	CICP26	0.146907	0.0164489
Adipose_Subcutaneous	5_176731452_G_T_b37	ENSG00000213347.6	MXD3	0.921394	ENSG00000228305.1	AC016734.2	0.56295	0.099287
Adipose_Subcutaneous	10_51570414_T_A_b37	ENSG00000204169.6	AGAP7	0.106438	ENSG00000204150.7	CTGLF11P	0.114664	0.000655845
Adipose_Subcutaneous	17_44068492_A_G_b37	ENSG00000266497.1	RP11-995C19.2	0.317528	ENSG00000265218.1		0.303974	0.00390486
Adipose_Subcutaneous	3_39452123_G_A_b37	ENSG00000168028.9	RPSA	0.787579	ENSG00000237506.2	RPSAP15	0.210452	0
Adipose_Subcutaneous	14_36267078_C_CT_b37	ENSG00000174373.11	RALGAPA1	0.736465	ENSG00000229419.1	RALGAPA1P	0.721176	0
Adipose_Subcutaneous	16_16296488_G_A_b37	ENSG00000103226.13	NOMO3	0.347829	ENSG00000205746.5		0.185107	0.0135704
Adipose_Subcutaneous	16_16296488_G_A_b37	ENSG00000227827.3	RP11-958N24.2	0.279822	ENSG00000205746.5		0.185107	9.9923e-09
Adipose_Subcutaneous	2_87123824_C_T_b37	ENSG00000183281.10	PLGLB1	0.250272	ENSG00000240935.2	PLGLA	0.311892	3.03979e-13
Adipose_Subcutaneous	2_87277202_T_C_b37	ENSG00000125551.14	PLGLB2	0.274864	ENSG00000240935.2	PLGLA	0.311892	0.00130433
Adipose_Subcutaneous	2_87277202_T_C_b37	ENSG00000230395.1	AC092651.1	0.2	ENSG00000240935.2	PLGLA	0.311892	1.22331e-09
Adipose_Subcutaneous	7_128273056_G_T_b37	ENSG00000242588.2	RP11-274B21.1	0.265695	ENSG00000253326.2	RP11-261C10.7	0.34244	3.38396e-13
Adipose_Subcutaneous	7_128211085_G_A_b37	ENSG00000270810.1	RP11-274B21.8	1	ENSG00000253326.2	RP11-261C10.7	0.34244	0.0989813
Adipose_Subcutaneous	2_132231378_G_C_b37	ENSG00000173272.9	MZT2A	0.674522	ENSG00000227632.2	AC018804.6	0.564576	0.00491368
Adipose_Subcutaneous	7_128225542_C_T_b37	ENSG00000273270.1	RP11-212P7.2	0.676217	ENSG00000253326.2	RP11-261C10.7	0.34244	0.00440353
Adipose_Subcutaneous	1_226258009_C_T_b37	ENSG00000163041.5	H3F3A	0.803323	ENSG00000235655.2	H3F3AP4	0.276503	7.72102e-07
Adipose_Subcutaneous	9_130219669_C_T_b37	ENSG00000197958.8	RPL12	0.905365	ENSG00000204196.4	RPL12P16	0.192137	0
Adipose_Subcutaneous	16_16296488_G_A_b37	ENSG00000103226.13	NOMO3	0.347829	ENSG00000260447.1	RP11-304L19.2	0.278706	0.0781341
Adipose_Subcutaneous	16_16296488_G_A_b37	ENSG00000183889.8	AC138969.4	0.146547	ENSG00000260447.1	RP11-304L19.2	0.278706	0.0157721
Adipose_Subcutaneous	16_16296488_G_A_b37	ENSG00000227827.3	RP11-958N24.2	0.279822	ENSG00000260447.1	RP11-304L19.2	0.278706	1.95818e-07
Adipose_Subcutaneous	16_16296488_G_A_b37	ENSG00000244257.4	PKD1P1	0.186338	ENSG00000260447.1	RP11-304L19.2	0.278706	0.0529579
Adipose_Subcutaneous	12_56435929_C_G_b37	ENSG00000197728.5	RPS26	0.83037	ENSG00000212994.4	RPS26P6	0.0815922	0.000277
Adipose_Subcutaneous	9_44118498_G_C_b37	ENSG00000236816.2	ANKRD20A7P	0.281782	ENSG00000237869.2		0.404965	1.11022e-15
Adipose_Subcutaneous	11_18405510_G_T_b37	ENSG00000134333.9	LDHA	0.837642	ENSG00000214110.3	LDHAP4	0.829076	0.00676361
Adipose_Subcutaneous	2_87317017_A_G_b37	ENSG00000231259.3	AC125232.1	0.360082	ENSG00000240935.2	PLGLA	0.311892	0.0192537
Adipose_Subcutaneous	13_31044885_A_G_b37	ENSG00000189403.10	HMGB1	0.758334	ENSG00000132967.9	HMGB1P5	0.376768	5.11413e-12
Adipose_Subcutaneous	5_69291044_A_G_b37	ENSG00000197822.6	OCLN	0.46568	ENSG00000230847.4	RP11-195E2.1	0.5	0
Adipose_Subcutaneous	9_68830690_C_T_b37	ENSG00000172014.11	ANKRD20A4	0.176675	ENSG00000183148.5	ANKRD20A2	0.165214	6.86644e-05
Adipose_Subcutaneous	9_68830690_C_T_b37	ENSG00000196774.3	ANKRD20A1	0.163338	ENSG00000183148.5	ANKRD20A2	0.165214	5.94133e-07
Adipose_Subcutaneous	10_48305258_A_G_b37	ENSG00000179296.9	CTGLF12P	0.159621	ENSG00000204172.7	AGAP10;AGAP9	0.145546	0.0754703
Adipose_Subcutaneous	7_128273056_G_T_b37	ENSG00000242588.2	RP11-274B21.1	0.265695	ENSG00000234419.1	CICP13	0.21686	5.9952e-15
Adipose_Subcutaneous	10_48308886_T_C_b37	ENSG00000198035.9	AGAP9	0.129192	ENSG00000254929.2	RP11-144G6.12	0.201819	2.28706e-14
Adipose_Subcutaneous	10_48308886_T_C_b37	ENSG00000198035.9	AGAP9	0.129192	ENSG00000204172.7	AGAP10;AGAP9	0.145546	0
Adipose_Subcutaneous	15_31058693_C_T_b37	ENSG00000166664.9	CHRFAM7A	0.419253	ENSG00000175344.12	CHRNA7	0.52755	0
Adipose_Subcutaneous	15_31058693_C_T_b37	ENSG00000263070.1	RP11-382B18.3	0.231538	ENSG00000175344.12	CHRNA7	0.52755	0
Adipose_Subcutaneous	7_128225542_C_T_b37	ENSG00000273270.1	RP11-212P7.2	0.676217	ENSG00000234419.1	CICP13	0.21686	4.49417e-09
Adipose_Subcutaneous	5_69291044_A_G_b37	ENSG00000197822.6	OCLN	0.46568	ENSG00000254353.1	RP11-195E2.4	0.375074	7.37699e-12
Adipose_Subcutaneous	15_84954730_T_C_b37	ENSG00000230373.4	GOLGA6L5;GOLGA6L5P	0.136595	ENSG00000215749.8	RP13-996F3.5	0.120338	0.0406357
Adipose_Subcutaneous	7_128209858_C_T_b37	ENSG00000230715.2	RP11-274B21.4	0.292784	ENSG00000233003.3	CICP26	0.146907	1.35699e-05
Adipose_Subcutaneous	17_15686346_C_G_b37	ENSG00000265519.1	CTD-3157E16.1	0.578838	ENSG00000188013.5	MEIS3P2	0.580837	4.8094e-07
Adipose_Subcutaneous	17_15700992_T_C_b37	ENSG00000179277.9	MEIS3P1	0.541101	ENSG00000188013.5	MEIS3P2	0.580837	0
Adipose_Subcutaneous	9_44120127_T_C_b37	ENSG00000170165.5	CR848007.2	0.201408	ENSG00000237869.2		0.404965	1.67393e-11
Adipose_Subcutaneous	17_74683666_G_A_b37	ENSG00000261335.1	RP11-318A15.2	1	ENSG00000232320.5		0.664009	0.00189769
Adipose_Subcutaneous	16_69973127_A_G_b37	ENSG00000157322.12	CLEC18A	0.354378	ENSG00000196436.7	NPIPB15	0.280708	4.37833e-07
Adipose_Subcutaneous	16_69973127_A_G_b37	ENSG00000196696.8	PDXDC2P	0.507387	ENSG00000196436.7	NPIPB15	0.280708	1.95519e-07
Adipose_Subcutaneous	7_128251667_A_G_b37	ENSG00000243302.3	RP11-274B21.2	0.160049	ENSG00000233003.3	CICP26	0.146907	1.59475e-07
Adipose_Subcutaneous	7_128281256_G_A_b37	ENSG00000243679.1	RP11-274B21.3	0.345899	ENSG00000214837.4	LINC01347	0.203684	0.000155025
Adipose_Subcutaneous	1_121200490_T_G_b37	ENSG00000236933.1	RP11-439A17.7	0.34846	ENSG00000122497.13	NBPF14	0.0907645	0.0634991
Adipose_Subcutaneous	16_2013756_T_C_b37	ENSG00000255513.1	AC005363.9	0.98556	ENSG00000240342.2	RPS2P5	0.15602	0.00309612
Adipose_Subcutaneous	15_32350448_C_G_b37	ENSG00000223509.4	RP11-632K20.7	0.376749	ENSG00000270055.1	CTD-3092A11.2	0.461217	0
Adipose_Subcutaneous	19_21922636_T_G_b37	ENSG00000197020.6	ZNF100	0.792882	ENSG00000142621.15	FHAD1	0.979511	0.0244414
Adipose_Subcutaneous	16_2013756_T_C_b37	ENSG00000255513.1	AC005363.9	0.98556	ENSG00000235508.2	RPS2P7	0.323832	0.0867151
Adipose_Subcutaneous	17_44852612_A_C_b37	ENSG00000228696.4	ARL17B	0.287935	ENSG00000266918.1	RP11-798G7.8	0.210367	2.93987e-05
Adipose_Subcutaneous	12_56435929_C_G_b37	ENSG00000197728.5	RPS26	0.83037	ENSG00000234354.2	RPS26P47	0.0806803	0.000291598
Adipose_Subcutaneous	11_18432375_T_C_b37	ENSG00000166796.7	LDHC	0.953788	ENSG00000214110.3	LDHAP4	0.829076	0.0311202
Adipose_Subcutaneous	12_56435929_C_G_b37	ENSG00000197728.5	RPS26	0.83037	ENSG00000223416.3	RPS26P15	0.101478	0.000317927
Adipose_Subcutaneous	22_23649242_T_G_b37	ENSG00000186716.15	BCR	0.652615	ENSG00000169668.7	BCRP2	0.224547	0.0591696
Adipose_Subcutaneous	10_51585752_C_T_b37	ENSG00000174194.11	AGAP8	0.183724	ENSG00000204150.7	CTGLF11P	0.114664	0.00478476
Adipose_Subcutaneous	12_56435929_C_G_b37	ENSG00000197728.5	RPS26	0.83037	ENSG00000212829.7	RPS26P3	0.0792233	0.00263205
Adipose_Subcutaneous	3_195734432_G_A_b37	ENSG00000145113.17	MUC4	0.760041	ENSG00000236833.1	AC024560.2	0.488662	0.0476867
Adipose_Subcutaneous	1_121200490_T_G_b37	ENSG00000236933.1	RP11-439A17.7	0.34846	ENSG00000272755.1	RP11-326G21.1	1	0.0944639
Adipose_Subcutaneous	15_31040421_T_C_b37	ENSG00000178081.8	ULK4P3	0.293875	ENSG00000175344.12	CHRNA7	0.52755	3.12466e-10
Adipose_Subcutaneous	15_32096504_C_T_b37	ENSG00000261064.1	RP11-1000B6.3	0.321975	ENSG00000186399.8	GOLGA8R	0.174716	7.52332e-12
Adipose_Subcutaneous	15_32096504_C_T_b37	ENSG00000261064.1	RP11-1000B6.3	0.321975	ENSG00000270055.1	CTD-3092A11.2	0.461217	0.0410475
Adipose_Subcutaneous	3_49410066_A_C_b37	ENSG00000235261.1	NICN1-AS1	0.99556	ENSG00000197582.5	GPX1P1	0.636905	0.00589264
Adipose_Subcutaneous	9_130219669_C_T_b37	ENSG00000197958.8	RPL12	0.905365	ENSG00000185834.9	RPL12P4	0.310301	0
Adipose_Subcutaneous	16_3313025_T_C_b37	ENSG00000006194.6	ZNF263	0.992042	ENSG00000179909.11	ZNF154	0.882235	0.0202106
Adipose_Subcutaneous	7_128209858_C_T_b37	ENSG00000230715.2	RP11-274B21.4	0.292784	ENSG00000214837.4	LINC01347	0.203684	7.35056e-10
Adipose_Subcutaneous	6_32191041_G_A_b37	ENSG00000204301.5	NOTCH4	0.981685	ENSG00000253570.1	RNF5P1	0.803648	0.0208782
Adipose_Subcutaneous	7_6476500_G_A_b37	ENSG00000164535.10	DAGLB	0.952498	ENSG00000249936.2	RAC1P2	0.582345	0.0720124
Adipose_Subcutaneous	15_32350448_C_G_b37	ENSG00000223509.4	RP11-632K20.7	0.376749	ENSG00000186399.8	GOLGA8R	0.174716	0.0757777
Adipose_Subcutaneous	3_195335265_A_G_b37	ENSG00000272792.1	RP11-141C7.4	0.33157	ENSG00000236833.1	AC024560.2	0.488662	0.000637583
Adipose_Subcutaneous	5_81579071_AAG_A_b37	ENSG00000186468.8	RPS23	0.912925	ENSG00000230629.2	RPS23P8	0.739583	0
Adipose_Subcutaneous	16_3317036_A_G_b37	ENSG00000010539.7	ZNF200	0.982115	ENSG00000179909.11	ZNF154	0.882235	0.000382142
Adipose_Subcutaneous	3_195338127_A_G_b37	ENSG00000224769.1	AC069213.1;MUC20P1	0.531011	ENSG00000236833.1	AC024560.2	0.488662	0
Adipose_Subcutaneous	9_44009181_A_T_b37	ENSG00000269788.1	RP11-399F4.2	0.201943	ENSG00000235832.2	CNN2P3	0.195052	0
Adipose_Subcutaneous	5_70681475_G_A_b37	ENSG00000249437.3	NAIP	0.345698	ENSG00000179978.10	RP11-1319K7.1	0.355887	0
Adipose_Subcutaneous	7_128251667_A_G_b37	ENSG00000243302.3	RP11-274B21.2	0.160049	ENSG00000214837.4	LINC01347	0.203684	2.85327e-12
Adipose_Subcutaneous	1_247045119_A_G_b37	ENSG00000153207.10	AHCTF1	0.606956	ENSG00000226121.1	AHCTF1P1	0.697125	0
Adipose_Subcutaneous	7_128273056_G_T_b37	ENSG00000242588.2	RP11-274B21.1	0.265695	ENSG00000229376.3	CICP3	0.0987356	0.0717771
Adipose_Subcutaneous	1_226258009_C_T_b37	ENSG00000163041.5	H3F3A	0.803323	ENSG00000250966.2	RP11-402J6.3	0.303536	5.63039e-11
Adipose_Subcutaneous	10_47047517_C_T_b37	ENSG00000204177.6	BMS1P1	0.195163	ENSG00000179296.9	CTGLF12P	0.159621	6.10921e-06
Adipose_Subcutaneous	10_47047517_C_T_b37	ENSG00000231187.2	RP11-38L15.3	0.775033	ENSG00000179296.9	CTGLF12P	0.159621	0.000943161
Adipose_Subcutaneous	15_31705913_C_T_b37	ENSG00000269930.1	RP11-932O9.9	0.119838	ENSG00000223509.4	RP11-632K20.7	0.376749	0.00976498
Adipose_Subcutaneous	15_31682346_C_T_b37	ENSG00000270055.1	CTD-3092A11.2	0.461217	ENSG00000223509.4	RP11-632K20.7	0.376749	0
Adipose_Subcutaneous	15_31680445_G_A_b37	ENSG00000247728.2	RP11-932O9.7	0.425274	ENSG00000223509.4	RP11-632K20.7	0.376749	0.00481821
Adipose_Subcutaneous	15_83669439_T_C_b37	ENSG00000169612.3	FAM103A1	0.628793	ENSG00000235272.1	FAM103A2P	0.617262	0.00112835
Adipose_Subcutaneous	7_128273056_G_T_b37	ENSG00000242588.2	RP11-274B21.1	0.265695	ENSG00000233003.3	CICP26	0.146907	0.00158433
Adipose_Subcutaneous	7_128225542_C_T_b37	ENSG00000273270.1	RP11-212P7.2	0.676217	ENSG00000233003.3	CICP26	0.146907	9.33035e-05
Adipose_Subcutaneous	13_115038879_A_G_b37	ENSG00000169062.10	UPF3A	0.522328	ENSG00000226478.2	UPF3AP1	0.514979	0
Adipose_Subcutaneous	11_17067930_G_A_b37	ENSG00000110700.2	RPS13	0.955432	ENSG00000228929.1	RP11-159C21.4;RPS13P2	0.879703	4.44089e-16
Adipose_Subcutaneous	17_18212753_C_T_b37	ENSG00000176974.13	SHMT1	0.927828	ENSG00000188933.10	USP32P1	0.359227	0.000954025
Adipose_Subcutaneous	19_21922636_T_G_b37	ENSG00000197020.6	ZNF100	0.792882	ENSG00000233485.1	RP3-467K16.2	0.984543	0.0216415
Adipose_Subcutaneous	19_40925176_T_TAA_b37	ENSG00000128000.11	ZNF780B	0.879691	ENSG00000134463.10	ECHDC3	0.98299	0.069267
Adipose_Subcutaneous	15_32350448_C_G_b37	ENSG00000223509.4	RP11-632K20.7	0.376749	ENSG00000247728.2	RP11-932O9.7	0.425274	0.00127831
Adipose_Subcutaneous	12_53752480_AT_A_b37	ENSG00000185591.5	SP1	0.953469	ENSG00000187534.5	CTC-471F3.4;PRR13P5	0.586172	0.00643536
Adipose_Subcutaneous	15_32096504_C_T_b37	ENSG00000261064.1	RP11-1000B6.3	0.321975	ENSG00000215302.4	CTD-3092A11.1	0.438058	1.27966e-06
Adipose_Subcutaneous	10_46072872_T_C_b37	ENSG00000165406.11	2016-03-08	0.994303	ENSG00000204169.6	AGAP7	0.106438	0.0257027
Adipose_Subcutaneous	15_31705913_C_T_b37	ENSG00000269930.1	RP11-932O9.9	0.119838	ENSG00000166664.9	CHRFAM7A	0.419253	3.02016e-06
Adipose_Subcutaneous	7_128286797_C_A_b37	ENSG00000271553.1	RP11-274B21.10	1	ENSG00000226220.1	CICP22	0.223749	0.0994015
Adipose_Subcutaneous	15_31743767_A_G_b37	ENSG00000175344.12	CHRNA7	0.52755	ENSG00000186399.8	GOLGA8R	0.174716	0.0103173
Adipose_Subcutaneous	17_18537660_T_G_b37	ENSG00000220161.4	RP1-37N7.3	0.53545	ENSG00000226145.3	AC022596.6;KRT16P6	0.704731	0.0582521
Adipose_Subcutaneous	16_70559548_A_C_b37	ENSG00000189091.8	SF3B3	0.935202	ENSG00000196796.4	CTB-134H23.2	0.14007	0.0332793
Adipose_Subcutaneous	10_46999453_G_A_b37	ENSG00000204176.9	SYT15	0.623093	ENSG00000179296.9	CTGLF12P	0.159621	0.00215849
Adipose_Subcutaneous	5_70679626_G_A_b37	ENSG00000230847.4	RP11-195E2.1	0.5	ENSG00000197822.6	OCLN	0.46568	0
Adipose_Subcutaneous	7_65209501_C_G_b37	ENSG00000272831.1	RP11-792A8.4	0.917184	ENSG00000230583.2	GTF2IRD1P1	0.965735	3.12448e-05
Adipose_Subcutaneous	12_56385579_C_T_b37	ENSG00000123411.10	IKZF4	0.994772	ENSG00000212829.7	RPS26P3	0.0792233	0.0240733
Adipose_Subcutaneous	15_30908007_C_A_b37	ENSG00000261794.1	GOLGA8H	0.149533	ENSG00000175344.12	CHRNA7	0.52755	4.85423e-08
Adipose_Subcutaneous	15_32921352_T_C_b37	ENSG00000232653.4	GOLGA8N	0.145624	ENSG00000260693.1	AC026150.8	0.210543	5.56203e-05
Adipose_Subcutaneous	15_32273716_G_A_b37	ENSG00000254912.2	RP11-632K20.2	0.469237	ENSG00000186399.8	GOLGA8R	0.174716	8.86846e-13
Adipose_Subcutaneous	9_44118498_G_C_b37	ENSG00000236816.2	ANKRD20A7P	0.281782	ENSG00000235327.1		0.233219	1.05915e-13
Adipose_Subcutaneous	15_32350448_C_G_b37	ENSG00000223509.4	RP11-632K20.7	0.376749	ENSG00000166664.9	CHRFAM7A	0.419253	2.97093e-05
Adipose_Subcutaneous	5_70308251_C_T_b37	ENSG00000205565.6	RP11-497H16.6	0.0975555	ENSG00000250138.3	RP11-848G14.5	0.0738226	0
Adipose_Subcutaneous	5_70308251_C_T_b37	ENSG00000226259.6	GTF2H2B	0.336043	ENSG00000250138.3	RP11-848G14.5	0.0738226	2.92411e-05
Adipose_Subcutaneous	5_70308251_C_T_b37	ENSG00000237075.4	RP11-497H16.2	0.10067	ENSG00000250138.3	RP11-848G14.5	0.0738226	0
Adipose_Subcutaneous	10_51586514_T_A_b37	ENSG00000225784.5	RP11-592B15.4	0.460607	ENSG00000188234.9	AGAP4	0.111497	0.0268568
Adipose_Subcutaneous	17_74681613_A_G_b37	ENSG00000182534.9	MXRA7	0.817187	ENSG00000232320.5		0.664009	0
Adipose_Subcutaneous	9_44009181_A_T_b37	ENSG00000269788.1	RP11-399F4.2	0.201943	ENSG00000235310.1	GXYLT1P6	0.316292	0
Adipose_Subcutaneous	7_102544387_T_TTTTC_b37	ENSG00000105808.13	RASA4	0.307063	ENSG00000228903.2	RASA4CP	0.34312	0
Adipose_Subcutaneous	7_102544387_T_TTTTC_b37	ENSG00000272949.1	RP11-514P8.8	0.333776	ENSG00000228903.2	RASA4CP	0.34312	0
Adipose_Subcutaneous	5_70681475_G_A_b37	ENSG00000254353.1	RP11-195E2.4	0.375074	ENSG00000253203.2	GUSBP3	0.135636	4.29454e-08
Adipose_Subcutaneous	5_70681475_G_A_b37	ENSG00000249437.3	NAIP	0.345698	ENSG00000253203.2	GUSBP3	0.135636	0.000286148
Adipose_Subcutaneous	9_44120127_T_C_b37	ENSG00000170165.5	CR848007.2	0.201408	ENSG00000235327.1		0.233219	2.22045e-16
Adipose_Subcutaneous	7_128281256_G_A_b37	ENSG00000271529.1	CICP14	0.138156	ENSG00000228882.1	CICP9	0.269736	0.0469585
Adipose_Subcutaneous	9_135501960_A_G_b37	ENSG00000125485.13	DDX31	0.999933	ENSG00000183578.5	TNFAIP8L3	0.89417	0.0528314
Adipose_Subcutaneous	17_44662558_G_C_b37	ENSG00000260075.1	NSFP1	0.5	ENSG00000265218.1		0.303974	0.00658307
Adipose_Subcutaneous	15_32350448_C_G_b37	ENSG00000223509.4	RP11-632K20.7	0.376749	ENSG00000269930.1	RP11-932O9.9	0.119838	0.00385707
Adipose_Subcutaneous	6_26621379_T_A_b37	ENSG00000181315.6	ZNF322	0.526872	ENSG00000242375.1	RP11-498P14.3	0.5	0.0446682
Adipose_Subcutaneous	15_31058693_C_T_b37	ENSG00000166664.9	CHRFAM7A	0.419253	ENSG00000223509.4	RP11-632K20.7	0.376749	0.00016397
Adipose_Subcutaneous	15_31058693_C_T_b37	ENSG00000263070.1	RP11-382B18.3	0.231538	ENSG00000223509.4	RP11-632K20.7	0.376749	0.00329576
Adipose_Subcutaneous	15_31743767_A_G_b37	ENSG00000175344.12	CHRNA7	0.52755	ENSG00000166664.9	CHRFAM7A	0.419253	0
Adipose_Subcutaneous	16_2013756_T_C_b37	ENSG00000255513.1	AC005363.9	0.98556	ENSG00000189343.6	RPS2P46	0.252698	0.000320877
Adipose_Subcutaneous	6_32676988_T_G_b37	ENSG00000231852.2	CYP21A2	0.598901	ENSG00000253570.1	RNF5P1	0.803648	0.0847222
Adipose_Subcutaneous	3_195477791_G_A_b37	ENSG00000185485.10	SDHAP1	0.42681	ENSG00000236833.1	AC024560.2	0.488662	0.00186613
Adipose_Subcutaneous	16_3317036_A_G_b37	ENSG00000010539.7	ZNF200	0.982115	ENSG00000083814.8	ZNF671	0.987798	0.0585077
Adipose_Subcutaneous	2_242850012_C_T_b37	ENSG00000220804.4	AC093642.5	0.221346	ENSG00000260923.1	AC137934.1	0.173336	0.0787257
Adipose_Subcutaneous	5_70679626_G_A_b37	ENSG00000230847.4	RP11-195E2.1	0.5	ENSG00000253203.2	GUSBP3	0.135636	0.00865579
Adipose_Subcutaneous	15_32096504_C_T_b37	ENSG00000261064.1	RP11-1000B6.3	0.321975	ENSG00000247728.2	RP11-932O9.7	0.425274	0.000252353
Adipose_Subcutaneous	9_139691992_G_A_b37	ENSG00000244187.3	TMEM141	0.987726	ENSG00000160055.15	TMEM234	1	1.2515e-05
Adipose_Subcutaneous	8_101937374_A_G_b37	ENSG00000164924.13	YWHAZ	0.711409	ENSG00000229932.2	YWHAZP3	0.549223	0
Adipose_Subcutaneous	16_2010857_T_A_b37	ENSG00000255198.3	SNHG9	1	ENSG00000240342.2	RPS2P5	0.15602	0.0216555
Adipose_Subcutaneous	15_30908007_C_A_b37	ENSG00000261794.1	GOLGA8H	0.149533	ENSG00000223509.4	RP11-632K20.7	0.376749	0.00660276
Adipose_Subcutaneous	2_114380544_A_G_b37	ENSG00000225398.2	PGM5P4;RP11-395L14.5	0.587069	ENSG00000184319.11	AC002055.4;RPL23AP82	0.167017	0.0727519
Adipose_Subcutaneous	12_114408276_A_G_b37	ENSG00000111335.8	OAS2	0.971462	ENSG00000132530.12	XAF1	0.829132	0
Adipose_Subcutaneous	7_128263289_A_AG_b37	ENSG00000135245.9	HILPDA	0.891816	ENSG00000253326.2	RP11-261C10.7	0.34244	0.0378273
Adipose_Subcutaneous	7_102441180_G_T_b37	ENSG00000168255.14	POLR2J3	0.228622	ENSG00000228903.2	RASA4CP	0.34312	4.24711e-11
Adipose_Subcutaneous	6_31116210_G_A_b37	ENSG00000137310.7	TCF19	0.997797	ENSG00000253645.1	CTD-2544N14.3	1	0.0317608
Adipose_Subcutaneous	5_70568209_G_A_b37	ENSG00000145736.10	GTF2H2	0.319057	ENSG00000197822.6	OCLN	0.46568	3.55424e-09
Adipose_Subcutaneous	12_56435929_C_G_b37	ENSG00000197728.5	RPS26	0.83037	ENSG00000225071.1		0.0823267	0.000239917
Adipose_Subcutaneous	12_53839956_C_G_b37	ENSG00000205352.6	PRR13	0.751681	ENSG00000187534.5	CTC-471F3.4;PRR13P5	0.586172	4.18948e-07
Adipose_Subcutaneous	11_77884433_T_C_b37	ENSG00000188997.3	KCTD21	0.95282	ENSG00000184227.3	ACOT1	0.617426	0.0342708
Adipose_Subcutaneous	10_45917117_T_C_b37	ENSG00000230869.1	AGAP10P;CTGLF10P	0.192698	ENSG00000204150.7	CTGLF11P	0.114664	4.98206e-06
Adipose_Subcutaneous	16_70449124_C_T_b37	ENSG00000198373.8	WWP2	0.986608	ENSG00000149582.11	TMEM25	0.974928	0.0327073
Adipose_Subcutaneous	3_195374868_G_A_b37	ENSG00000061938.12	TNK2	0.981772	ENSG00000065308.4	TRAM2	0.973034	0.033802
Adipose_Subcutaneous	3_129084581_A_G_b37	ENSG00000270773.1	RP13-685P2.7	1	ENSG00000261512.2	RP11-46D6.1	0.478576	0.010515
Adipose_Subcutaneous	15_32920064_G_A_b37	ENSG00000206127.6	GOLGA8O	0.15163	ENSG00000260693.1	AC026150.8	0.210543	1.09159e-06
Adipose_Subcutaneous	5_171692496_G_A_b37	ENSG00000168246.5	UBTD2	0.989851	ENSG00000162738.5	VANGL2	0.997269	0.00453351
Adipose_Subcutaneous	5_68828803_T_A_b37	ENSG00000253203.2	GUSBP3	0.135636	ENSG00000254353.1	RP11-195E2.4	0.375074	3.18485e-11
Adipose_Subcutaneous	4_41242363_T_C_b37	ENSG00000154277.8	UCHL1	0.999157	ENSG00000258303.1	RP11-887P2.6	0.922659	0.0643331
Adipose_Subcutaneous	6_30934451_A_G_b37	ENSG00000146112.7	PPP1R18	1	ENSG00000204301.5	NOTCH4	0.981685	0.035926
Adipose_Subcutaneous	16_10828260_A_G_b37	ENSG00000153060.3	TEKT5	1	ENSG00000272822.1	RP11-302B13.5	0.900644	0.0241755
Adipose_Subcutaneous	5_70308251_C_T_b37	ENSG00000172058.11	SERF1A	0.415646	ENSG00000197822.6	OCLN	0.46568	0.00304792
Adipose_Subcutaneous	5_70308251_C_T_b37	ENSG00000226259.6	GTF2H2B	0.336043	ENSG00000197822.6	OCLN	0.46568	7.81619e-05
Adipose_Subcutaneous	5_70308251_C_T_b37	ENSG00000237075.4	RP11-497H16.2	0.10067	ENSG00000197822.6	OCLN	0.46568	0.0803293
Adipose_Subcutaneous	3_49213637_C_T_b37	ENSG00000185909.10	KLHDC8B	0.993254	ENSG00000197582.5	GPX1P1	0.636905	0.000533854
Adipose_Subcutaneous	10_45917117_T_C_b37	ENSG00000230869.1	AGAP10P;CTGLF10P	0.192698	ENSG00000204169.6	AGAP7	0.106438	0.00138631
Adipose_Subcutaneous	11_7675579_A_C_b37	ENSG00000166394.10	CYB5R2	0.996967	ENSG00000237945.3	LINC00649	0.955478	0.0913977
Adipose_Subcutaneous	7_75101065_C_T_b37	ENSG00000205583.9	STAG3L1	0.349529	ENSG00000174353.13	STAG3L3	0.33377	1.84621e-07
Adipose_Subcutaneous	5_70308251_C_T_b37	ENSG00000172058.11	SERF1A	0.415646	ENSG00000198237.7	RP11-98J23.2	0.142607	2.40696e-09
Adipose_Subcutaneous	5_70308251_C_T_b37	ENSG00000226259.6	GTF2H2B	0.336043	ENSG00000198237.7	RP11-98J23.2	0.142607	0.0394393
Adipose_Subcutaneous	6_32456366_G_C_b37	ENSG00000229391.3	HLA-DRB6	0.913627	ENSG00000204525.10	HLA-C	0.790104	0.0827687
Adipose_Subcutaneous	16_30337486_GAGCC_G_b37	ENSG00000198064.9	RP11-347C12.1	0.0680876	ENSG00000234719.4	RP11-166B2.1	0.29016	0.0882105
Adipose_Subcutaneous	6_53670645_G_A_b37	ENSG00000271218.1	RP3-523E19.2	1	ENSG00000125148.6	MT2A	0.936222	0.0444015
Adipose_Subcutaneous	16_10968336_T_C_b37	ENSG00000262151.1	RP11-876N24.2	1	ENSG00000204252.8	HLA-DOA	0.927208	0
Adipose_Subcutaneous	1_25822202_A_C_b37	ENSG00000188672.12	RHCE	0.762566	ENSG00000188033.5	ZNF490	0.80702	0.0803715
Adipose_Subcutaneous	16_67390398_A_G_b37	ENSG00000135723.9	FHOD1	0.995894	ENSG00000115073.6	ACTR1B	1	0.0552714
Adipose_Subcutaneous	15_75833786_C_T_b37	ENSG00000140400.10	MAN2C1	0.981595	ENSG00000206560.6	ANKRD28	0.996899	0.0354323
Adipose_Subcutaneous	4_152047365_C_T_b37	ENSG00000145425.5	RPS3A	0.725687	ENSG00000234797.4	RPS3AP6	0.221661	0
Adipose_Subcutaneous	8_11466745_A_T_b37	ENSG00000255122.1	RP11-303G3.6	0.684211	ENSG00000231859.1	AC007875.2	0.253281	3.82094e-06
Adipose_Subcutaneous	5_70681475_G_A_b37	ENSG00000254353.1	RP11-195E2.4	0.375074	ENSG00000197822.6	OCLN	0.46568	3.95239e-14
Adipose_Subcutaneous	5_70681475_G_A_b37	ENSG00000249437.3	NAIP	0.345698	ENSG00000197822.6	OCLN	0.46568	0.0374493
Adipose_Subcutaneous	16_69973127_A_G_b37	ENSG00000157322.12	CLEC18A	0.354378	ENSG00000257513.3	NPIPB1P	0.348813	0.0553656
Adipose_Subcutaneous	16_69973127_A_G_b37	ENSG00000196696.8	PDXDC2P	0.507387	ENSG00000257513.3	NPIPB1P	0.348813	0.0101079
Adipose_Subcutaneous	5_68828803_T_A_b37	ENSG00000253203.2	GUSBP3	0.135636	ENSG00000230847.4	RP11-195E2.1	0.5	0.000157423
Adipose_Subcutaneous	12_56679751_A_G_b37	ENSG00000170581.9	STAT2	0.966988	ENSG00000196656.6		0.185662	0.0307889
Adipose_Subcutaneous	5_70681475_G_A_b37	ENSG00000254353.1	RP11-195E2.4	0.375074	ENSG00000250138.3	RP11-848G14.5	0.0738226	0.000340461
Adipose_Subcutaneous	5_70681475_G_A_b37	ENSG00000249437.3	NAIP	0.345698	ENSG00000250138.3	RP11-848G14.5	0.0738226	0.0201368
Adipose_Subcutaneous	3_158391299_T_TTTC_b37	ENSG00000272087.1	RP11-379F4.7	1	ENSG00000166896.3	XRCC6BP1	1	0.00279746
Adipose_Subcutaneous	1_1481174_AC_A_b37	ENSG00000205231.1	TTLL10-AS1	0.901395	ENSG00000255905.1	AL391319.1	1	0.0542772
Adipose_Subcutaneous	3_195317047_G_A_b37	ENSG00000271662.1	RP11-141C7.3	0.422198	ENSG00000236833.1	AC024560.2	0.488662	0.0231905
Adipose_Subcutaneous	19_17973573_G_A_b37	ENSG00000105640.8	RPL18A	0.948112	ENSG00000213442.4	RPL18AP3	0.470802	0
Adipose_Subcutaneous	17_27054637_TC_T_b37	ENSG00000109113.13	RAB34	1	ENSG00000120647.5	CCDC77	0.987144	0.000183917
Adipose_Subcutaneous	2_25384705_T_C_b37	ENSG00000115138.6	POMC	1	ENSG00000145220.9	LYAR	0.999438	0.0215102
Adipose_Subcutaneous	16_462881_A_T_b37	ENSG00000242612.2	DECR2	0.955846	ENSG00000236283.1	AC013463.2	0.661504	0.0936455
Adipose_Subcutaneous	4_142136101_A_G_b37	ENSG00000109445.6	ZNF330	1	ENSG00000271109.1	CTC-523E23.11	0.596222	0.0108636
Adipose_Subcutaneous	3_195742905_C_T_b37	ENSG00000242086.4	LINC00969	0.701143	ENSG00000236833.1	AC024560.2	0.488662	0
Adipose_Subcutaneous	12_109874230_A_G_b37	ENSG00000151148.9	UBE3B	0.984637	ENSG00000074054.13	CLASP1	0.996319	0.0174524
Adipose_Subcutaneous	6_53684815_G_T_b37	ENSG00000137269.10	LRRC1	0.97705	ENSG00000125148.6	MT2A	0.936222	0.0728127
Adipose_Subcutaneous	10_17247573_A_G_b37	ENSG00000107614.17	TRDMT1	0.978711	ENSG00000148356.9	LRSAM1	1	0.00565636
Adipose_Subcutaneous	15_72976521_A_C_b37	ENSG00000159322.13	ADPGK	0.95021	ENSG00000095585.12	BLNK	0.998237	0.0464301
Adipose_Subcutaneous	1_7490377_C_A_b37	ENSG00000225126.1	RP4-549F15.1	1	ENSG00000258741.2	RP11-386M24.4	0.964355	0.0481121
Adipose_Subcutaneous	1_150723747_T_C_b37	ENSG00000259357.1	RP11-316M1.12	1	ENSG00000125845.6	BMP2	0.998524	0.093326
Adipose_Subcutaneous	5_79954075_GC_G_b37	ENSG00000228716.2	DHFR	0.516943	ENSG00000237118.2	CYP2F1P;CYP2F2P	0.606209	1.37167e-05
Adipose_Subcutaneous	5_70870200_G_A_b37	ENSG00000215630.5	GUSBP9	0.120274	ENSG00000197822.6	OCLN	0.46568	0.016861
Adipose_Subcutaneous	15_84263684_A_G_b37	ENSG00000259315.1	ACTG1P17;RP11-752G15.9	0.924671	ENSG00000261701.2	HPR	0.689414	0.0576643
Adipose_Subcutaneous	16_69973127_A_G_b37	ENSG00000157322.12	CLEC18A	0.354378	ENSG00000196796.4	CTB-134H23.2	0.14007	0.00501249
Adipose_Subcutaneous	16_69973127_A_G_b37	ENSG00000196696.8	PDXDC2P	0.507387	ENSG00000196796.4	CTB-134H23.2	0.14007	0.0180093
Adipose_Subcutaneous	1_2293791_G_C_b37	ENSG00000157916.14	RER1	0.999897	ENSG00000100603.9	SNW1	0.862577	0.000574912
Adipose_Subcutaneous	6_42163898_T_C_b37	ENSG00000112599.8	GUCA1B	1	ENSG00000167733.9	HSD11B1L	0.911399	0.0736185
Adipose_Subcutaneous	1_154239334_T_TC_b37	ENSG00000143575.10	HAX1	0.922211	ENSG00000262312.1	LA16c-390H2.4	1	0.041278
Adipose_Subcutaneous	7_150439554_G_A_b37	ENSG00000273419.1	RP4-751H13.7	0.964917	ENSG00000149636.11	DSN1	0.938236	6.22753e-05
Adipose_Subcutaneous	5_72296606_T_TA_b37	ENSG00000157107.9	FCHO2	0.991774	ENSG00000260766.1	RP11-226L15.5	1	0.0117487
Adipose_Subcutaneous	15_30839126_C_T_b37	ENSG00000260128.2	ULK4P2	0.299724	ENSG00000175344.12	CHRNA7	0.52755	3.40273e-08
Adipose_Subcutaneous	15_32096504_C_T_b37	ENSG00000261064.1	RP11-1000B6.3	0.321975	ENSG00000269930.1	RP11-932O9.9	0.119838	1.14274e-06
Adipose_Subcutaneous	7_128273056_G_T_b37	ENSG00000242588.2	RP11-274B21.1	0.265695	ENSG00000228897.1	CTD-2021A8.2	0.300481	0.0105584
Adipose_Subcutaneous	5_141020848_G_GGTA_b37	ENSG00000197948.6	FCHSD1	0.99639	ENSG00000142751.10	GPN2	0.855481	0.00868594
Adipose_Subcutaneous	6_3069057_C_T_b37	ENSG00000272277.1	RP1-40E16.12	1	ENSG00000100580.7	TMED8	0.964581	0.0681455
Adipose_Subcutaneous	6_10727852_T_C_b37	ENSG00000111843.9	TMEM14C	0.908422	ENSG00000228989.1	AC133528.2	0.792294	0.0900251
Adipose_Subcutaneous	15_85052329_A_C_b37	ENSG00000259570.1	RP11-671M22.4	0.438667	ENSG00000215749.8	RP13-996F3.5	0.120338	0.0323344
Adipose_Subcutaneous	6_31650592_AG_A_b37	ENSG00000204428.8	LY6G5C	0.98578	ENSG00000117139.12	KDM5B	0.999087	0.0735066
Adipose_Subcutaneous	1_33124583_CGTGT_C_b37	ENSG00000162521.14	RBBP4	0.828142	ENSG00000142409.4	ZNF787	0.999096	0.0261698
Adipose_Subcutaneous	17_73299631_A_G_b37	ENSG00000257073.1	AC011933.1	1	ENSG00000099995.14	SF3A1	1	0.000811915
Adipose_Subcutaneous	19_41252119_G_T_b37	ENSG00000188493.10	C19orf54	0.942181	ENSG00000156711.12	MAPK13	0.991141	0.0236876
Adipose_Subcutaneous	2_220253623_G_A_b37	ENSG00000123992.14	DNPEP	0.979053	ENSG00000155093.13	PTPRN2	1	0.0395386
Adipose_Subcutaneous	7_128281256_G_A_b37	ENSG00000271529.1	CICP14	0.138156	ENSG00000226220.1	CICP22	0.223749	2.22045e-15
Adipose_Subcutaneous	7_128281256_G_A_b37	ENSG00000243679.1	RP11-274B21.3	0.345899	ENSG00000226220.1	CICP22	0.223749	0.0348161
Adipose_Subcutaneous	1_1481174_AC_A_b37	ENSG00000205231.1	TTLL10-AS1	0.901395	ENSG00000112562.14	SMOC2	1	0.0630738
Adipose_Subcutaneous	1_26559306_G_T_b37	ENSG00000130695.9	CEP85	0.981494	ENSG00000237190.3	CDKN2AIPNL	0.800888	0.0433417
Adipose_Subcutaneous	12_56539598_T_C_b37	ENSG00000257553.1	RP11-603J24.17	0.896853	ENSG00000196656.6		0.185662	0.0484249
Adipose_Subcutaneous	5_70568209_G_A_b37	ENSG00000145736.10	GTF2H2	0.319057	ENSG00000253203.2	GUSBP3	0.135636	5.38302e-09
Adipose_Subcutaneous	4_10076860_G_A_b37	ENSG00000261490.1	RP11-448G15.3	0.988163	ENSG00000177054.9	ZDHHC13	0.991671	0.024004
Adipose_Subcutaneous	4_104020422_T_C_b37	ENSG00000164039.10	BDH2	0.9046	ENSG00000232699.2	BDH2P1	0.909639	5.07828e-08
Adipose_Subcutaneous	1_173438109_A_G_b37	ENSG00000185278.10	ZBTB37	0.961785	ENSG00000168096.10	ANKS3	0.94586	0.0255066
Adipose_Subcutaneous	15_31040421_T_C_b37	ENSG00000178081.8	ULK4P3	0.293875	ENSG00000223509.4	RP11-632K20.7	0.376749	0.0833821
Adipose_Subcutaneous	3_48723302_G_C_b37	ENSG00000213672.3	NCKIPSD	1	ENSG00000197582.5	GPX1P1	0.636905	0.0314062
Adipose_Subcutaneous	19_12639911_C_T_b37	ENSG00000269560.1	CTD-2192J16.21	0.991139	ENSG00000257376.1		0.939421	0.0595514
Adipose_Subcutaneous	1_78439416_G_GTC_b37	ENSG00000235927.2	NEXN-AS1	0.955948	ENSG00000181472.4	ZBTB2	1	0.0637232
Adipose_Subcutaneous	6_19804014_C_T_b37	ENSG00000228412.2	RP4-625H18.2	1	ENSG00000113649.7	TCERG1	0.998918	0.0983786
Adipose_Subcutaneous	15_32273716_G_A_b37	ENSG00000254912.2	RP11-632K20.2	0.469237	ENSG00000247728.2	RP11-932O9.7	0.425274	2.80819e-06
Adipose_Subcutaneous	4_152047365_C_T_b37	ENSG00000145425.5	RPS3A	0.725687	ENSG00000214389.2	RPS3AP26	0.236005	0
Adipose_Subcutaneous	20_48789745_T_C_b37	ENSG00000231742.1	LINC01273;RP11-112L6.4	1	ENSG00000258142.2		1	0.052442
Adipose_Subcutaneous	2_88005546_T_C_b37	ENSG00000234231.2	AC093616.4	0.317494	ENSG00000183696.9	UPP1	0.979103	0.00891745
Adipose_Subcutaneous	11_59935938_A_G_b37	ENSG00000166926.4	MS4A6E	0.896032	ENSG00000137216.14	TMEM63B	0.999399	0.0826029
Adipose_Subcutaneous	17_17448691_A_G_b37	ENSG00000133027.13	PEMT	1	ENSG00000270587.1		0.861357	0.054037
Adipose_Subcutaneous	7_150439554_G_A_b37	ENSG00000273419.1	RP4-751H13.7	0.964917	ENSG00000203739.3	RP11-296O14.3	1	0.0213597
Adipose_Subcutaneous	2_208096911_T_C_b37	ENSG00000240440.1	AC007879.3	1	ENSG00000243264.1	IGKV2D-29	0.434573	0.0815702
Adipose_Subcutaneous	7_128251667_A_G_b37	ENSG00000243302.3	RP11-274B21.2	0.160049	ENSG00000226220.1	CICP22	0.223749	0.0552148
Adipose_Subcutaneous	16_3313025_T_C_b37	ENSG00000006194.6	ZNF263	0.992042	ENSG00000196724.8	ZNF418	0.973101	0.00393346
Adipose_Subcutaneous	14_77407669_G_A_b37	ENSG00000100603.9	SNW1	0.862577	ENSG00000222328.1	RNU2-2P	0.957265	0.0573732
Adipose_Subcutaneous	11_105096513_A_T_b37	ENSG00000137752.18	CASP1	0.8749	ENSG00000244256.2	RN7SL130P	1	0.0962898
Adipose_Subcutaneous	13_53040822_A_G_b37	ENSG00000136108.10	CKAP2	0.998878	ENSG00000132139.8	GAS2L2	1	0.0879266
Adipose_Subcutaneous	3_196122801_C_T_b37	ENSG00000163960.7	UBXN7	0.958348	ENSG00000158042.8	MRPL17	1	0.0221547
Adipose_Subcutaneous	1_3536051_C_T_b37	ENSG00000130764.5	LRRC47	0.91065	ENSG00000198858.5	R3HDM4	0.976451	0.000707161
Adipose_Subcutaneous	19_36999787_C_T_b37	ENSG00000254004.2	ZNF260	0.93072	ENSG00000196381.6	ZNF781	0.973044	0.0266566
Adipose_Subcutaneous	17_5326341_C_T_b37	ENSG00000129197.10	RPAIN	0.89542	ENSG00000259705.1	RP11-227D13.1	1	0.0863535
Adipose_Subcutaneous	2_172549630_T_A_b37	ENSG00000077380.11	DYNC1I2	0.795194	ENSG00000225137.1	DYNC1I2P1	0.785998	0
Adipose_Subcutaneous	4_152691688_A_ATTC_b37	ENSG00000059691.7	GATB;PET112	0.987111	ENSG00000242076.1	IGKV1-33	0.447712	0.0530091
Adipose_Subcutaneous	3_40493218_G_T_b37	ENSG00000223797.1	ENTPD3-AS1	0.976744	ENSG00000139239.6	RPL14P1	0.721476	0.0503213
Adipose_Subcutaneous	14_104281919_G_C_b37	ENSG00000100711.9	ZFYVE21	0.966664	ENSG00000258774.1	NANOGP7	0.723509	0.0381203
Adipose_Subcutaneous	19_58572979_G_A_b37	ENSG00000176293.15	ZNF135	0.905758	ENSG00000109794.9	FAM149A	0.999201	0.00862529
Adipose_Subcutaneous	5_133327915_A_G_b37	ENSG00000213585.6	VDAC1	0.676665	ENSG00000183155.4	RABIF	0.971893	0.0979616
Adipose_Subcutaneous	15_31705913_C_T_b37	ENSG00000269930.1	RP11-932O9.9	0.119838	ENSG00000263070.1	RP11-382B18.3	0.231538	0.000388228
Adipose_Subcutaneous	7_5024540_G_A_b37	ENSG00000272968.1	RBAK-RBAKDN	0.852148	ENSG00000134760.5	DSG1	1	0.0863935
Adipose_Subcutaneous	15_31680445_G_A_b37	ENSG00000247728.2	RP11-932O9.7	0.425274	ENSG00000263070.1	RP11-382B18.3	0.231538	0.00437533
Adipose_Subcutaneous	19_52970866_G_A_b37	ENSG00000258405.5	ZNF578	0.95548	ENSG00000267279.1	RP11-879F14.2	1	0.0918925
Adipose_Subcutaneous	15_31682346_C_T_b37	ENSG00000270055.1	CTD-3092A11.2	0.461217	ENSG00000263070.1	RP11-382B18.3	0.231538	0.0132269
Adipose_Subcutaneous	7_102114631_A_G_b37	ENSG00000233297.4	RASA4DP	0.259686	ENSG00000022556.11	NLRP2	0.867608	0.0197611
Adipose_Subcutaneous	12_49500509_C_T_b37	ENSG00000139636.11	LMBR1L	0.999366	ENSG00000119147.5	C2orf40	0.990638	0.0658991
Adipose_Subcutaneous	20_5678383_T_C_b37	ENSG00000101311.11	FERMT1	1	ENSG00000088002.7	SULT2B1	0.910735	0.0120357
Adipose_Subcutaneous	9_33432409_T_A_b37	ENSG00000165272.10	AQP3	0.993729	ENSG00000271537.1	RP11-365F18.6	0.984863	0.0179547
Adipose_Subcutaneous	15_32273716_G_A_b37	ENSG00000254912.2	RP11-632K20.2	0.469237	ENSG00000215302.4	CTD-3092A11.1	0.438058	0
Adipose_Subcutaneous	14_23168643_A_G_b37	ENSG00000211788.2	TRAV13-1	1	ENSG00000116830.7	TTF2	0.935225	0.00518889
Adipose_Subcutaneous	7_98023153_T_C_b37	ENSG00000272782.1	RP4-607J23.2	0.926077	ENSG00000090316.11	MAEA	0.988042	0.00971141
Adipose_Subcutaneous	8_27355130_T_C_b37	ENSG00000120915.9	EPHX2	0.988099	ENSG00000273338.1	RP11-386I14.4	1	0.00349488
Adipose_Subcutaneous	15_43596210_TTTTAAA_T_b37	ENSG00000168806.6	LCMT2	0.998946	ENSG00000046647.9	GEMIN8	0.946372	0.0916148
Adipose_Subcutaneous	16_4838617_T_C_b37	ENSG00000267077.1	RP11-127I20.5	0.955228	ENSG00000178081.8	ULK4P3	0.293875	0.0602463
Adipose_Subcutaneous	15_90656502_CCCCG_C_b37	ENSG00000182054.5	IDH2	0.897598	ENSG00000162078.7	ZG16B	1	0.00267799
Adipose_Subcutaneous	7_75161318_T_A_b37	ENSG00000178809.7	TRIM73	0.382511	ENSG00000174353.13	STAG3L3	0.33377	6.70822e-05
Adipose_Subcutaneous	1_53700170_T_C_b37	ENSG00000162384.9	C1orf123	0.996558	ENSG00000113851.9	CRBN	1	0.0414602
Adipose_Subcutaneous	10_45923528_C_A_b37	ENSG00000188234.9	AGAP4	0.111497	ENSG00000204169.6	AGAP7	0.106438	4.15169e-07
Adipose_Subcutaneous	17_7358861_T_C_b37	ENSG00000170175.6	CHRNB1	0.889753	ENSG00000197321.10	SVIL	0.870034	0.094449
Adipose_Subcutaneous	11_113187949_A_G_b37	ENSG00000170209.4	ANKK1	0.945914	ENSG00000157191.15	NECAP2	0.988229	0.0359393
Adipose_Subcutaneous	10_45923528_C_A_b37	ENSG00000188234.9	AGAP4	0.111497	ENSG00000174194.11	AGAP8	0.183724	5.57332e-13
Adipose_Subcutaneous	19_58008943_G_GGACA_b37	ENSG00000105136.15	ZNF419	0.838719	ENSG00000138623.5	SEMA7A	1	0.0515751
Adipose_Subcutaneous	19_19897424_T_C_b37	ENSG00000267419.1	CTC-559E9.6	0.922976	ENSG00000167978.12	SRRM2	0.994854	0.0607307
Adipose_Subcutaneous	1_77685430_T_C_b37	ENSG00000142892.10	PIGK	0.995349	ENSG00000003436.10	TFPI	0.877049	0.0112733
Adipose_Subcutaneous	7_99451283_T_G_b37	ENSG00000241685.4	ARPC1A	0.779684	ENSG00000131002.7	TXLNGY	1	0.0542999
Adipose_Subcutaneous	10_30594022_T_TA_b37	ENSG00000259994.1	RP11-305E6.4	0.935125	ENSG00000227946.1		1	0.0225854
Adipose_Subcutaneous	12_59281754_C_T_b37	ENSG00000139263.7	LRIG3	1	ENSG00000229083.1	PSMA6P2	0.925341	0.00822269
Adipose_Subcutaneous	11_332094_A_C_b37	ENSG00000270972.1	RP11-326C3.15	1	ENSG00000183741.7	CBX6	0.996513	0.00763297
Adipose_Subcutaneous	1_21915085_C_T_b37	ENSG00000142789.15	CELA3A	0.798321	ENSG00000204983.8	PRSS1	0.857921	0
Adipose_Subcutaneous	1_21915085_C_T_b37	ENSG00000219073.3	CELA3B	0.735663	ENSG00000204983.8	PRSS1	0.857921	0
Adipose_Subcutaneous	9_35000289_G_A_b37	ENSG00000165280.11	VCP	1	ENSG00000224985.1		1	0.0114878
Adipose_Subcutaneous	15_85248216_T_C_b37	ENSG00000197696.5	NMB	1	ENSG00000259243.1	RP13-996F3.4	0.091176	0.0665075
Adipose_Subcutaneous	19_44045501_C_T_b37	ENSG00000176472.6	ZNF575	0.999404	ENSG00000131773.9	KHDRBS3	0.999736	0.0169588
Adipose_Subcutaneous	11_64997091_C_T_b37	ENSG00000173486.8	FKBP2	0.994016	ENSG00000273328.1	RP11-141M3.5	0.977608	0.0372753
Adipose_Subcutaneous	1_17004867_G_A_b37	ENSG00000228549.2	U1	0.553996	ENSG00000151892.10	GFRA1	0.996236	0.0212967
Adipose_Subcutaneous	5_172958116_G_A_b37	ENSG00000253785.1	CTC-308K20.3	0.850844	ENSG00000111196.5	MAGOHB	0.951754	0.00652032
Adipose_Subcutaneous	9_115973393_T_C_b37	ENSG00000119321.4	FKBP15	0.999788	ENSG00000114698.10	PLSCR4	0.999705	0.0126933
Adipose_Subcutaneous	17_44662558_G_C_b37	ENSG00000260075.1	NSFP1	0.5	ENSG00000214425.2	LRRC37A4P	0.346458	0.00969678
Adipose_Subcutaneous	4_159601676_C_T_b37	ENSG00000171503.7	ETFDH	0.919402	ENSG00000259838.1	TCEB1P2	0.581975	0.026902
Adipose_Subcutaneous	11_840363_C_T_b37	ENSG00000177700.5	POLR2L	0.946379	ENSG00000198947.10	DMD	0.990204	0.0616462
Adipose_Subcutaneous	7_6319917_C_T_b37	ENSG00000086232.8	EIF2AK1	0.980652	ENSG00000186951.12	PPARA	0.96609	0.051861
Adipose_Subcutaneous	7_128281256_G_A_b37	ENSG00000271529.1	CICP14	0.138156	ENSG00000228897.1	CTD-2021A8.2	0.300481	0.0237293
Adipose_Subcutaneous	1_161189812_T_C_b37	ENSG00000162736.11	NCSTN	0.994102	ENSG00000189283.5	FHIT	0.979794	0.011203
Adipose_Subcutaneous	1_22278252_T_C_b37	ENSG00000184677.12	ZBTB40	0.984829	ENSG00000067955.9	CBFB	0.982237	0.0170425
Adipose_Subcutaneous	1_161189812_T_C_b37	ENSG00000162736.11	NCSTN	0.994102	ENSG00000100603.9	SNW1	0.862577	0.0804753
Adipose_Subcutaneous	3_153038982_A_G_b37	ENSG00000241220.1	RP11-292E2.1	1	ENSG00000167483.13	FAM129C	0.73164	0.0411545
Adipose_Subcutaneous	1_27765978_T_C_b37	ENSG00000174950.6	CD164L2	1	ENSG00000159459.7	UBR1	0.980952	0.00656377
Adipose_Subcutaneous	5_69291044_A_G_b37	ENSG00000197822.6	OCLN	0.46568	ENSG00000145736.10	GTF2H2	0.319057	3.11611e-09
Adipose_Subcutaneous	5_14332325_T_C_b37	ENSG00000154124.4	FAM105B;OTULIN	0.975146	ENSG00000138050.10	THUMPD2	0.984095	0.090378
Adipose_Subcutaneous	15_65669388_G_T_b37	ENSG00000138617.10	PARP16	1	ENSG00000112640.10	PPP2R5D	1	0.00145207
Adipose_Subcutaneous	1_21915085_C_T_b37	ENSG00000142789.15	CELA3A	0.798321	ENSG00000179751.6	SYCN	1	0
Adipose_Subcutaneous	1_21915085_C_T_b37	ENSG00000219073.3	CELA3B	0.735663	ENSG00000179751.6	SYCN	1	0
Adipose_Subcutaneous	5_70304646_AG_A_b37	ENSG00000179978.10	RP11-1319K7.1	0.355887	ENSG00000250138.3	RP11-848G14.5	0.0738226	0.0228961
Adipose_Subcutaneous	4_170676210_T_TC_b37	ENSG00000249955.1	RP11-6E9.4	1	ENSG00000255090.1	MIR100HG;RP11-820L6.1	0.960403	0.0292948
Adipose_Subcutaneous	5_662543_A_G_b37	ENSG00000112877.6	CEP72	1	ENSG00000153944.6	MSI2	0.974414	0.0835509
Adipose_Subcutaneous	4_77007218_C_G_b37	ENSG00000138750.10	NUP54	1	ENSG00000143321.14	HDGF	0.927295	0.0383314
Adipose_Subcutaneous	15_84953964_A_G_b37	ENSG00000244056.2	RN7SL417P	0.337158	ENSG00000215749.8	RP13-996F3.5	0.120338	0.0625281
Adipose_Subcutaneous	11_65217589_T_C_b37	ENSG00000173727.7	AP000769.1	1	ENSG00000147592.4	LACTB2	0.985913	0.0465889
Adipose_Subcutaneous	7_56117449_T_A_b37	ENSG00000106153.12	CHCHD2	0.743146	ENSG00000067829.14	IDH3G	1	0.097
Adipose_Subcutaneous	11_66117111_C_T_b37	ENSG00000174684.6	B3GNT1;B4GAT1	0.999812	ENSG00000204271.6	SPIN3	1	0.0328584
Adipose_Subcutaneous	8_38540944_C_T_b37	ENSG00000254321.1	RP11-495O10.1	1	ENSG00000105497.3	ZNF175	0.987492	0.0634507
Adipose_Subcutaneous	3_112908913_A_C_b37	ENSG00000163606.6	CD200R1	0.971938	ENSG00000048392.7	RRM2B	0.893847	0.034505
Adipose_Subcutaneous	11_1780955_C_CAAGCCCTG_b37	ENSG00000244242.1	IFITM10	1	ENSG00000148308.13	GTF3C5	0.989555	0.0590038
Adipose_Subcutaneous	8_10322621_C_G_b37	ENSG00000272505.1	RP11-981G7.6	1	ENSG00000160791.12	CCR5	0.997879	0.0199129
Adipose_Subcutaneous	10_90757787_A_C_b37	ENSG00000026103.15	FAS	1	ENSG00000120280.5	CXorf21	0.887147	0.0466741
Adipose_Subcutaneous	1_20415701_A_T_b37	ENSG00000162543.5	UBXN10	1	ENSG00000132386.6	SERPINF1	0.895604	0.0795749
Adipose_Subcutaneous	16_74548007_G_A_b37	ENSG00000168411.9	RFWD3	0.963566	ENSG00000244582.2	RPL21P120	0.270592	0.0249501
Adipose_Subcutaneous	11_60598449_C_T_b37	ENSG00000162148.6	PPP1R32	1	ENSG00000170786.8	SDR16C5	1	0.00325419
Adipose_Subcutaneous	7_42038_G_C_b37	ENSG00000242611.1	AC093627.8	0.460248	ENSG00000237419.1	RP11-885N19.6	0.403419	0
Adipose_Subcutaneous	5_180256172_A_G_b37	ENSG00000245060.2	LINC00847	1	ENSG00000105988.6	NHP2P1	0.766753	0.0322511
Adipose_Subcutaneous	1_9191572_G_T_b37	ENSG00000180758.10	GPR157	0.865022	ENSG00000175911.4	AC127496.1	0.925047	0.00153679
Adipose_Subcutaneous	9_97222889_GCCC_G_b37	ENSG00000148110.11	HIATL1	0.930051	ENSG00000158985.9	CDC42SE2	0.952374	0.018396
Adipose_Subcutaneous	10_96100119_C_T_b37	ENSG00000268894.2	PLCE1-AS1	1	ENSG00000259634.1	RP11-529H20.5	1	0.0508113
Adipose_Subcutaneous	20_36730583_T_G_b37	ENSG00000101413.7	RPRD1B	0.997142	ENSG00000233493.3	TMEM238	1	0.048969
Adipose_Subcutaneous	20_34441473_C_A_b37	ENSG00000100991.7	TRPC4AP	0.995873	ENSG00000144648.10	ACKR2	0.884542	0.00136763
Adipose_Subcutaneous	15_65547815_A_G_b37	ENSG00000138615.4	CILP	1	ENSG00000232415.1		1	0.0429302
Adipose_Subcutaneous	2_132256414_C_T_b37	ENSG00000152117.13	AC093838.4	0.666085	ENSG00000227632.2	AC018804.6	0.564576	2.51932e-05
Adipose_Subcutaneous	7_138683332_G_T_b37	ENSG00000229677.1	RP11-383F6.1	1	ENSG00000133142.13	TCEAL4	0.952686	0.00710618
Adipose_Subcutaneous	17_45780359_GGA_G_b37	ENSG00000198933.5	TBKBP1	1	ENSG00000167711.9	SERPINF2	1	0.0613989
Adipose_Subcutaneous	15_84470896_A_T_b37	ENSG00000176700.15	SCAND2P	0.982526	ENSG00000268636.1	CTB-33G10.11	1	0.0806913
Adipose_Subcutaneous	1_221040171_T_G_b37	ENSG00000238078.1	LINC01352;RP11-295M18.2	1	ENSG00000216863.5	LY86-AS1	1	0.000300741
Adipose_Subcutaneous	7_75094329_G_A_b37	ENSG00000174368.13	PMS2P2	0.177975	ENSG00000155428.8	TRIM74	0.411025	0.0486034
Adipose_Subcutaneous	5_68828803_T_A_b37	ENSG00000253203.2	GUSBP3	0.135636	ENSG00000145736.10	GTF2H2	0.319057	2.9975e-10
Adipose_Subcutaneous	8_74833948_C_T_b37	ENSG00000164764.10	SBSPON	0.939821	ENSG00000160352.11	ZNF714	0.717545	0.0936489
Adipose_Subcutaneous	15_41104701_A_G_b37	ENSG00000166140.13	ZFYVE19	0.997878	ENSG00000160932.6	LY6E	0.982983	0.00897418
Adipose_Subcutaneous	10_88661199_C_G_b37	ENSG00000107779.7	BMPR1A	0.748529	ENSG00000232460.3	BMPR1APS2	0.435598	0
Adipose_Subcutaneous	1_183425886_T_A_b37	ENSG00000116698.16	SMG7	0.999952	ENSG00000174749.5	C4orf32	0.671908	0.00173047
Adipose_Subcutaneous	15_31680445_G_A_b37	ENSG00000247728.2	RP11-932O9.7	0.425274	ENSG00000261064.1	RP11-1000B6.3	0.321975	0.000854901
Adipose_Subcutaneous	5_148218115_G_C_b37	ENSG00000169252.4	ADRB2	1	ENSG00000260566.2	RP11-20G6.3	1	0.000341661
Adipose_Subcutaneous	3_43962778_T_C_b37	ENSG00000261786.1	RP4-555D20.2	1	ENSG00000198910.8	L1CAM	1	0.00565237
Adipose_Subcutaneous	16_29680389_A_C_b37	ENSG00000169951.5	ZNF764	0.923167	ENSG00000206052.6	DOK6	0.997054	0.0510383
Adipose_Subcutaneous	2_56413345_G_T_b37	ENSG00000272180.1	RP11-481J13.1	0.945138	ENSG00000144224.12	UBXN4	1	0.029021
Adipose_Subcutaneous	2_56413345_G_T_b37	ENSG00000233251.3	AC007743.1	0.541689	ENSG00000144224.12	UBXN4	1	0.00210131
Adipose_Subcutaneous	15_31682346_C_T_b37	ENSG00000186399.8	GOLGA8R	0.174716	ENSG00000261064.1	RP11-1000B6.3	0.321975	1.47571e-11
Adipose_Subcutaneous	15_31682346_C_T_b37	ENSG00000270055.1	CTD-3092A11.2	0.461217	ENSG00000261064.1	RP11-1000B6.3	0.321975	0.0523683
Adipose_Subcutaneous	11_58811310_G_A_b37	ENSG00000234964.3	FABP5P7	0.229117	ENSG00000164687.6	FABP5	0.812979	0
Adipose_Subcutaneous	19_5716311_A_G_b37	ENSG00000130255.8	RPL36	0.965798	ENSG00000229474.2	PATL2	1	0.090487
Adipose_Subcutaneous	19_35660752_C_T_b37	ENSG00000089327.10	FXYD5	0.989521	ENSG00000169592.10	INO80E	1	0.06565
Adipose_Subcutaneous	2_128629552_A_C_b37	ENSG00000202532.1	RNU6-395P	1	ENSG00000211450.5	C11orf31	0.985803	0.0181164
Adipose_Subcutaneous	15_31705913_C_T_b37	ENSG00000269930.1	RP11-932O9.9	0.119838	ENSG00000261064.1	RP11-1000B6.3	0.321975	6.57193e-06
Adipose_Subcutaneous	15_31705913_C_T_b37	ENSG00000215302.4	CTD-3092A11.1	0.438058	ENSG00000261064.1	RP11-1000B6.3	0.321975	1.69081e-06
Adipose_Subcutaneous	15_50225447_A_G_b37	ENSG00000104043.10	ATP8B4	0.999517	ENSG00000066651.13	TRMT11	0.918657	0.00695224
Adipose_Subcutaneous	8_54434247_C_T_b37	ENSG00000253369.1	RP11-1081M5.1	1	ENSG00000135452.5	TSPAN31	0.85187	0.088219
Adipose_Subcutaneous	16_81170741_G_A_b37	ENSG00000166455.9	C16orf46	1	ENSG00000224837.1	GCSHP5	0.565588	8.65368e-05
Adipose_Subcutaneous	11_68772072_G_A_b37	ENSG00000256508.2	MRGPRF-AS1;RP11-554A11.6	1	ENSG00000125977.6	EIF2S2	0.836244	0.0255456
Adipose_Subcutaneous	16_1362199_G_A_b37	ENSG00000103275.14	UBE2I	0.974015	ENSG00000171033.8	PKIA	1	0.07188
Adipose_Subcutaneous	5_146697091_T_C_b37	ENSG00000169302.10	STK32A	0.981208	ENSG00000109111.10	SUPT6H	0.985253	0.0645446
Adipose_Subcutaneous	6_42905235_A_G_b37	ENSG00000124713.5	GNMT	1	ENSG00000267594.5	CYP4F24P	0.911978	0.0723131
Adipose_Subcutaneous	1_21915085_C_T_b37	ENSG00000142789.15	CELA3A	0.798321	ENSG00000175535.6	PNLIP	1	0
Adipose_Subcutaneous	1_21915085_C_T_b37	ENSG00000219073.3	CELA3B	0.735663	ENSG00000175535.6	PNLIP	1	0
Adipose_Subcutaneous	22_42534864_CTG_C_b37	ENSG00000100197.16	CYP2D6	0.572082	ENSG00000265126.1	CTB-187M2.2	1	0.0515466
Adipose_Subcutaneous	3_48867019_GTATA_G_b37	ENSG00000178149.12	DALRD3	1	ENSG00000197582.5	GPX1P1	0.636905	0.0451621
Adipose_Subcutaneous	2_149818349_T_C_b37	ENSG00000168280.12	KIF5C	0.99703	ENSG00000250978.1	RP11-357D18.1	1	0.0237118
Adipose_Subcutaneous	5_89790385_T_G_b37	ENSG00000176018.8	LYSMD3	1	ENSG00000196792.7	STRN3	0.984698	0.0033306
Adipose_Subcutaneous	5_74050427_T_TA_b37	ENSG00000198780.7	FAM169A	0.995427	ENSG00000196504.11	PRPF40A	0.999207	0.0033198
Adipose_Subcutaneous	3_169609162_T_G_b37	ENSG00000008952.12	SEC62	0.967797	ENSG00000248664.1		1	0.0184037
Adipose_Subcutaneous	16_72118880_C_T_b37	ENSG00000140830.4	TXNL4B	0.938613	ENSG00000188785.7	ZNF548	0.895162	0.0889833
Adipose_Subcutaneous	19_44992294_CTT_C_b37	ENSG00000104879.4	CKM	1	ENSG00000198125.8	MB	0.986745	0
Adipose_Subcutaneous	6_47661249_GGA_G_b37	ENSG00000146070.12	PLA2G7	0.985279	ENSG00000273489.1	RP11-180C16.1	1	0.0206549
Adipose_Subcutaneous	6_58279488_C_T_b37	ENSG00000239650.3	GUSBP4	0.158927	ENSG00000215158.5	RP11-1023L17.1	0.321421	0.0242258
Adipose_Subcutaneous	7_14113382_G_T_b37	ENSG00000006468.9	ETV1	0.998412	ENSG00000113525.5	IL5	1	0.0103063
Adipose_Subcutaneous	7_128273056_G_T_b37	ENSG00000242588.2	RP11-274B21.1	0.265695	ENSG00000214837.4	LINC01347	0.203684	0
Adipose_Subcutaneous	16_2878068_C_G_b37	ENSG00000167964.8	RAB26	0.997047	ENSG00000189410.7	SH2D5	1	0.00926404
Adipose_Subcutaneous	11_57174630_A_C_b37	ENSG00000186907.3	RTN4RL2	1	ENSG00000064932.11	SBNO2	0.978132	0.0118085
Adipose_Subcutaneous	11_57174630_A_C_b37	ENSG00000255301.1	RP11-624G17.3	1	ENSG00000064932.11	SBNO2	0.978132	0.000612138
Adipose_Subcutaneous	7_76856451_G_T_b37	ENSG00000127951.5	FGL2	0.928648	ENSG00000197043.9	ANXA6	1	0.0686937
Adipose_Subcutaneous	16_10625011_G_A_b37	ENSG00000256013.1	RP11-27M24.1	1	ENSG00000269246.1	CTC-246B18.10	1	0.0867592
Adipose_Subcutaneous	14_24557694_A_G_b37	ENSG00000100889.7	PCK2	1	ENSG00000159792.5	PSKH1	0.997709	0.0627171
Adipose_Subcutaneous	10_71670284_C_A_b37	ENSG00000107719.8	PALD1	0.998351	ENSG00000119630.9	PGF	0.981703	2.07789e-05
Adipose_Subcutaneous	9_137800731_T_G_b37	ENSG00000085265.6	FCN1	0.986535	ENSG00000235641.3	LINC00484	1	0.0424579
Adipose_Subcutaneous	3_187798142_C_T_b37	ENSG00000145012.8	LPP	0.913717	ENSG00000186001.8	LRCH3	0.893939	0.000354286
Adipose_Subcutaneous	12_6093136_A_G_b37	ENSG00000111665.7	CDCA3	0.99109	ENSG00000120889.8	TNFRSF10B	0.910317	0.05882
Adipose_Subcutaneous	19_21775371_C_T_b37	ENSG00000268278.1	RP11-420K14.1	0.885007	ENSG00000244482.5	LILRA6	0.651829	0.082124
Adipose_Subcutaneous	8_11795693_C_CTAA_b37	ENSG00000255495.1	FAM85A	0.30976	ENSG00000231859.1	AC007875.2	0.253281	8.59505e-05
Adipose_Subcutaneous	1_59105943_G_T_b37	ENSG00000162601.5	MYSM1	0.997814	ENSG00000169169.10	CPT1C	0.960148	0.0484956
Adipose_Subcutaneous	8_42392942_C_G_b37	ENSG00000176209.7	SMIM19	0.936281	ENSG00000204311.7	DFNB59	1	0.092617
Adipose_Subcutaneous	3_48928759_T_C_b37	ENSG00000178467.13	P4HTM	0.998586	ENSG00000179979.7	CRIPAK	0.919784	0.0273219
Adipose_Subcutaneous	15_100364242_G_A_b37	ENSG00000259363.1	CTD-2054N24.2	0.74152	ENSG00000152380.5	FAM151B	0.988907	0.0091346
Adipose_Subcutaneous	4_80847202_G_A_b37	ENSG00000163297.12	ANTXR2	0.970377	ENSG00000154917.6	RAB6B	0.999458	9.81973e-06
Adipose_Subcutaneous	7_128318168_A_G_b37	ENSG00000229413.1	AC018638.1	0.163782	ENSG00000228897.1	CTD-2021A8.2	0.300481	0.0110834
Adipose_Subcutaneous	11_9336093_C_T_b37	ENSG00000166471.6	TMEM41B	0.88658	ENSG00000152229.14	PSTPIP2	0.91324	0.0463442
Adipose_Subcutaneous	12_122227691_A_C_b37	ENSG00000272849.1	RP11-347I19.8	1	ENSG00000172594.8	SMPDL3A	1	0.0149347
Adipose_Subcutaneous	19_13166480_G_A_b37	ENSG00000104915.10	STX10	1	ENSG00000221963.5	APOL6	0.761127	0.0380284
Adipose_Subcutaneous	12_1909979_G_A_b37	ENSG00000151062.10	CACNA2D4	1	ENSG00000090447.7	TFAP4	0.989821	0.0444979
Adipose_Subcutaneous	17_48778298_T_C_b37	ENSG00000262967.1	RP11-294J22.6	0.893723	ENSG00000263934.2	SNORD3A	0.254747	0.00153908
Adipose_Subcutaneous	14_58720862_G_A_b37	ENSG00000257621.3	PSMA3-AS1;RP11-349A22.5	0.95129	ENSG00000258297.1		0.998234	1.06098e-06
Adipose_Subcutaneous	7_120915268_G_T_b37	ENSG00000106034.13	CPED1	0.951532	ENSG00000172031.6	EPHX4	1	0.0285088
Adipose_Subcutaneous	1_184709564_G_A_b37	ENSG00000116406.14	EDEM3	0.995635	ENSG00000170473.12	PYM1;WIBG	0.995836	0.0302496
Adipose_Subcutaneous	19_17973573_G_A_b37	ENSG00000105640.8	RPL18A	0.948112	ENSG00000230979.3	AC079250.1	0.554449	0
Adipose_Subcutaneous	3_30030048_A_G_b37	ENSG00000203652.3	AC099048.1	1	ENSG00000145349.12	CAMK2D	0.999554	0.0146905
Adipose_Subcutaneous	7_128225542_C_T_b37	ENSG00000273270.1	RP11-212P7.2	0.676217	ENSG00000214837.4	LINC01347	0.203684	0.0592436
Adipose_Subcutaneous	15_43922497_A_C_b37	ENSG00000242866.5	STRC	0.526003	ENSG00000139200.9	PIANP	0.99981	0.0558799
Adipose_Subcutaneous	1_2293791_G_C_b37	ENSG00000157916.14	RER1	0.999897	ENSG00000140990.10	NDUFB10	0.980494	0.0157075
Adipose_Subcutaneous	15_67912977_C_T_b37	ENSG00000188779.6	SKOR1	1	ENSG00000245534.2	RORA-AS1;RP11-219B17.1	1	0.0811606
Adipose_Subcutaneous	14_104330432_C_A_b37	ENSG00000126214.16	KLC1	1	ENSG00000130513.6	GDF15	0.979665	0.0363608
Adipose_Subcutaneous	17_57709519_G_A_b37	ENSG00000068489.8	PRR11	0.783448	ENSG00000144554.6	FANCD2	0.845107	0.0563959
Adipose_Subcutaneous	2_242793_G_C_b37	ENSG00000035115.17	SH3YL1	0.964821	ENSG00000197935.6	ZNF311	1	0.0107373
Adipose_Subcutaneous	19_34647742_A_T_b37	ENSG00000257103.4	LSM14A	0.940385	ENSG00000149380.7	P4HA3	0.946346	0.0911687
Adipose_Subcutaneous	9_35112486_C_T_b37	ENSG00000005238.15	FAM214B	0.981837	ENSG00000100422.9	CERK	0.969032	0.0809136
Adipose_Subcutaneous	10_74113333_T_C_b37	ENSG00000148719.10	DNAJB12	0.984455	ENSG00000005379.11	BZRAP1	0.999299	0.0193385
Adipose_Subcutaneous	12_49035559_C_T_b37	ENSG00000139620.8	KANSL2	0.998995	ENSG00000179772.6	FOXS1	1	0.0435155
Adipose_Subcutaneous	2_240064118_G_C_b37	ENSG00000178586.4	OR6B3	0.652386	ENSG00000007933.8	FMO3	0.979029	0.09447
Adipose_Subcutaneous	8_63909596_C_A_b37	ENSG00000137563.7	GGH	1	ENSG00000232450.1	RP4-730K3.3	1	0.0397265
Adipose_Subcutaneous	16_16943499_T_G_b37	ENSG00000133392.12	MYH11	0.985189	ENSG00000263335.1	AF001548.5	1	0
Adipose_Subcutaneous	22_18895875_A_T_b37	ENSG00000183628.8	DGCR6	0.716405	ENSG00000206140.5	TMEM191C	0.417519	0.00328448
Adipose_Subcutaneous	4_175444766_C_A_b37	ENSG00000250596.1	RP11-440I14.2	1	ENSG00000162601.5	MYSM1	0.997814	0.0681776
Adipose_Subcutaneous	14_67871473_G_A_b37	ENSG00000258561.1	RP11-72M17.1	0.983171	ENSG00000115233.7	PSMD14	0.996234	0.0536447
Adipose_Subcutaneous	10_98019584_T_C_b37	ENSG00000095585.12	BLNK	0.998237	ENSG00000101161.6	PRPF6	1	0.0602141
Adipose_Subcutaneous	5_78367092_T_C_b37	ENSG00000132837.10	DMGDH	0.968845	ENSG00000198242.9	RPL23A	0.784731	0.00664874
Adipose_Subcutaneous	20_35384734_G_A_b37	ENSG00000149636.11	DSN1	0.938236	ENSG00000104979.4	C19orf53	0.953744	0.000470103
Adipose_Subcutaneous	17_48713180_A_G_b37	ENSG00000108846.11	ABCC3	0.972977	ENSG00000105825.7	TFPI2	1	0.00262789
Adipose_Subcutaneous	6_29585081_T_TC_b37	ENSG00000229390.1	MICD	0.982234	ENSG00000249646.2	OR7E94P	0.643655	0.0478813
Adipose_Subcutaneous	4_13580532_A_G_b37	ENSG00000038219.8	BOD1L1	0.946702	ENSG00000088766.7	CRLS1	0.989688	0.00339771
Adipose_Subcutaneous	9_100669739_C_G_b37	ENSG00000136932.9	C9orf156	0.998647	ENSG00000111652.5	COPS7A	0.993682	0.0411806
Adipose_Subcutaneous	11_76946173_G_C_b37	ENSG00000178795.5	GDPD4	1	ENSG00000235999.1	RP11-403I13.8	0.473395	0.0421087
Adipose_Subcutaneous	6_31144678_G_T_b37	ENSG00000272501.1	XXbac-BPG299F13.17	0.669865	ENSG00000206503.7	HLA-A	0.843776	0.0229971
Adipose_Subcutaneous	11_332094_A_C_b37	ENSG00000255328.1	RP11-326C3.12	0.934353	ENSG00000214922.5	HLA-F-AS1	0.989213	0.0137972
Adipose_Subcutaneous	13_78237161_G_A_b37	ENSG00000005812.6	FBXL3	1	ENSG00000112276.9	BVES	0.923095	0.0699814
Adipose_Subcutaneous	2_28692345_C_G_b37	ENSG00000259080.1	RP11-158I13.2	1	ENSG00000236498.1	AC107081.5	0.985474	0.00277966
Adipose_Subcutaneous	17_66675_G_A_b37	ENSG00000181031.11	RPH3AL	0.958456	ENSG00000172466.11	ZNF24	0.996484	0.0627052
Adipose_Subcutaneous	12_56679751_A_G_b37	ENSG00000170581.9	STAT2	0.966988	ENSG00000222011.4	FAM185A	0.739397	0.0608304
Adipose_Subcutaneous	2_50762448_A_G_b37	ENSG00000179915.16	NRXN1	0.996206	ENSG00000243069.3	ARHGEF26-AS1	0.909892	0.00645188
Adipose_Subcutaneous	4_113344203_C_T_b37	ENSG00000073331.13	ALPK1	0.963043	ENSG00000136169.12	SETDB2	0.972067	0.0370796
Adipose_Subcutaneous	19_58898436_T_C_b37	ENSG00000083845.4	RPS5	0.985975	ENSG00000240622.1	RPL7P15	0.683478	0.0886268
Adipose_Subcutaneous	13_77569672_T_C_b37	ENSG00000102805.9	CLN5	0.996081	ENSG00000143322.15	ABL2	0.959822	0.0979539
Adipose_Subcutaneous	11_57174630_A_C_b37	ENSG00000255301.1	RP11-624G17.3	1	ENSG00000112245.6	PTP4A1	0.934982	0.0088297
Adipose_Subcutaneous	13_47395765_T_A_b37	ENSG00000231817.3	LINC01198;RP11-189B4.6	0.470131	ENSG00000197565.11	COL4A6	0.991419	0.0709802
Adipose_Subcutaneous	7_131041423_G_A_b37	ENSG00000231721.2	LINC-PINT;MKLN1-AS1	0.989577	ENSG00000119682.12	AREL1	1	0.045149
Adipose_Subcutaneous	16_58325864_T_C_b37	ENSG00000203343.2	AC009107.1	1	ENSG00000013306.11	SLC25A39	0.973873	0.0791327
Adipose_Subcutaneous	3_82575052_T_C_b37	ENSG00000114480.8	GBE1	0.981974	ENSG00000143801.12	PSEN2	0.973138	0.0174367
Adipose_Subcutaneous	20_33863953_G_A_b37	ENSG00000125966.8	MMP24	1	ENSG00000125630.11	POLR1B	0.986666	0.0642291
Adipose_Subcutaneous	10_131445027_G_A_b37	ENSG00000170430.9	MGMT	1	ENSG00000251364.2	CTD-2516F10.2	0.988365	0.0987077
Adipose_Subcutaneous	10_116725461_G_A_b37	ENSG00000165832.4	TRUB1	0.998268	ENSG00000111676.10	ATN1	1	0.0704032
Adipose_Subcutaneous	3_142844453_G_A_b37	ENSG00000241679.2	RP11-80H8.4	1	ENSG00000204186.3	ZDBF2	0.973118	0.0114628
Adipose_Subcutaneous	6_137136127_T_G_b37	ENSG00000112357.8	PEX7	1	ENSG00000135537.12	LACE1	0.995407	0.0532765
Adipose_Subcutaneous	22_30345434_G_A_b37	ENSG00000242114.1	MTFP1	1	ENSG00000111859.12	NEDD9	0.974468	0.0215847
Adipose_Subcutaneous	6_3137045_A_G_b37	ENSG00000137285.9	TUBB2B	0.741771	ENSG00000273010.1		1	0.018154
Adipose_Subcutaneous	17_19935901_T_C_b37	ENSG00000261033.1	RP11-209D14.2	1	ENSG00000112655.11	PTK7	0.967057	0.0331083
Adipose_Subcutaneous	18_12957770_G_A_b37	ENSG00000085415.11	SEH1L	0.966291	ENSG00000183918.10	SH2D1A	0.997025	0.0179937
Adipose_Subcutaneous	1_121372845_G_T_b37	ENSG00000227082.1	AL592494.5	0.821675	ENSG00000272755.1	RP11-326G21.1	1	0.0185481
Adipose_Subcutaneous	16_88906141_C_G_b37	ENSG00000141012.8	GALNS	0.979777	ENSG00000110700.2	RPS13	0.955432	0.0411884
Adipose_Subcutaneous	16_19969580_C_T_b37	ENSG00000167191.7	GPRC5B	1	ENSG00000236700.1	LINC01010	1	0.00088042
Adipose_Subcutaneous	4_38840162_C_T_b37	ENSG00000174130.8	TLR6	0.934806	ENSG00000130158.9	DOCK6	0.983886	0.006091
Adipose_Subcutaneous	17_33570441_C_A_b37	ENSG00000166750.5	SLFN5	0.951129	ENSG00000123612.11	ACVR1C	1	0.00374907
Adipose_Subcutaneous	3_3193826_T_A_b37	ENSG00000113851.9	CRBN	1	ENSG00000154473.13	BUB3	0.98252	0.000287256
Adipose_Subcutaneous	7_533352_G_C_b37	ENSG00000197461.9	PDGFA	0.99217	ENSG00000254363.2	CTB-131B5.5	0.979863	0.0106387
Adipose_Subcutaneous	8_38949819_AT_A_b37	ENSG00000272128.1	KB-1836B5.4	1	ENSG00000105835.7	NAMPT	0.822623	0.055434
Adipose_Subcutaneous	18_5239566_CTT_C_b37	ENSG00000263753.2	LINC00667	1	ENSG00000006468.9	ETV1	0.998412	0.0633979
Adipose_Subcutaneous	2_219557014_A_C_b37	ENSG00000135912.6	TTLL4	0.997039	ENSG00000109475.12	RPL34	0.948346	0.0455883
Adipose_Subcutaneous	1_22278252_T_C_b37	ENSG00000184677.12	ZBTB40	0.984829	ENSG00000116731.18	PRDM2	1	0.020851
Adipose_Subcutaneous	5_179256234_T_A_b37	ENSG00000087116.9	ADAMTS2	0.983171	ENSG00000213614.5	HEXA	0.99637	0.00349528
Adipose_Subcutaneous	5_177494159_A_G_b37	ENSG00000145916.14	RMND5B	0.939346	ENSG00000224891.1	AC007899.3	0.977175	0.000933114
Adipose_Subcutaneous	7_44422074_A_G_b37	ENSG00000015676.13	NUDCD3	0.992723	ENSG00000237298.4	TTN-AS1	0.999867	0.0469568
Adipose_Subcutaneous	15_72617416_A_T_b37	ENSG00000261460.1	RP11-106M3.3	1	ENSG00000074964.12	ARHGEF10L	1	0.0387233
Adipose_Subcutaneous	12_124077787_A_AT_b37	ENSG00000247373.2	RP11-486O12.2	0.985954	ENSG00000213281.4	NRAS	0.888229	0.0731235
Adipose_Subcutaneous	17_57850665_T_TG_b37	ENSG00000170832.8	USP32	0.8145	ENSG00000110852.4	CLEC2B	0.991361	2.52648e-05
Adipose_Subcutaneous	11_3673465_C_G_b37	ENSG00000132109.8	TRIM21	1	ENSG00000119917.9	IFIT3	0.868906	0
Adipose_Subcutaneous	7_87845139_A_G_b37	ENSG00000254003.1	CTB-167B5.1	1	ENSG00000272084.1	RP5-1126H10.2	0.995192	0.00210808
Adipose_Subcutaneous	11_3673465_C_G_b37	ENSG00000132109.8	TRIM21	1	ENSG00000107201.5	DDX58	0.957763	0
Adipose_Subcutaneous	20_34441473_C_A_b37	ENSG00000100991.7	TRPC4AP	0.995873	ENSG00000101460.8	MAP1LC3A	1	0.00731122
Adipose_Subcutaneous	1_89791328_C_A_b37	ENSG00000162645.8	GBP2	0.971702	ENSG00000204642.9	HLA-F	0.946633	7.01588e-11
Adipose_Subcutaneous	4_152047365_C_T_b37	ENSG00000145425.5	RPS3A	0.725687	ENSG00000178429.9	RPS3AP5	0.421612	0
Adipose_Subcutaneous	3_5222810_C_T_b37	ENSG00000134109.6	EDEM1	0.995162	ENSG00000181666.13	HKR1	0.87114	0.00475554
Adipose_Subcutaneous	10_82149655_T_C_b37	ENSG00000122378.9	FAM213A	0.870262	ENSG00000164941.9	INTS8	0.981495	0.00448776
Adipose_Subcutaneous	13_100518634_C_T_b37	ENSG00000125246.11	CLYBL	0.981086	ENSG00000221930.5	FAM45B	0.723226	0.0712555
Adipose_Subcutaneous	17_34949598_T_C_b37	ENSG00000108272.9	DHRS11	0.986613	ENSG00000259363.1	CTD-2054N24.2	0.74152	0.097603
Adipose_Subcutaneous	10_77163288_G_A_b37	ENSG00000272692.1	RP11-399K21.14	1	ENSG00000258545.1	RHOXF1-AS1	0.853797	0.0236573
Adipose_Subcutaneous	15_90818331_G_T_b37	ENSG00000228998.3	RP11-697E2.7	0.902968	ENSG00000077721.11	UBE2A	0.999911	0.00655652
Adipose_Subcutaneous	14_94595989_T_C_b37	ENSG00000119632.3	IFI27L2	1	ENSG00000145349.12	CAMK2D	0.999554	0.0131263
Adipose_Subcutaneous	14_35657541_C_T_b37	ENSG00000100902.6	PSMA6	0.863156	ENSG00000249947.2	XBP1P1	1	0.0699276
Adipose_Subcutaneous	12_48484958_T_C_b37	ENSG00000240399.1	RP1-228P16.1	1	ENSG00000198729.4	PPP1R14C	1	0.0246231
Adipose_Subcutaneous	7_128281256_G_A_b37	ENSG00000243679.1	RP11-274B21.3	0.345899	ENSG00000225119.3	LINC00999	0.0832838	0.00495299
Adipose_Subcutaneous	19_46947920_C_T_b37	ENSG00000130748.6	TMEM160	1	ENSG00000268592.2	RP11-244K5.8	0.949499	0
Adipose_Subcutaneous	1_16116889_C_G_b37	ENSG00000162458.8	FBLIM1	0.79929	ENSG00000248874.1	C5orf17	0.834732	0.0503723
Adipose_Subcutaneous	6_49350785_G_A_b37	ENSG00000031691.6	CENPQ	1	ENSG00000237689.1	AC007064.24	0.228542	0.0183426
Adipose_Subcutaneous	2_85574456_A_G_b37	ENSG00000042445.9	RETSAT	0.867271	ENSG00000166780.6	C16orf45	0.988969	0.000363922
Adipose_Subcutaneous	1_21915085_C_T_b37	ENSG00000142789.15	CELA3A	0.798321	ENSG00000215704.5	CELA2B	0.887351	0
Adipose_Subcutaneous	1_21915085_C_T_b37	ENSG00000219073.3	CELA3B	0.735663	ENSG00000215704.5	CELA2B	0.887351	0
Adipose_Subcutaneous	19_54594798_A_G_b37	ENSG00000170909.9	OSCAR	0.927385	ENSG00000177112.3	MRVI1-AS1	1	0.0596984
Adipose_Subcutaneous	9_132560225_G_A_b37	ENSG00000136816.11	TOR1B	0.982733	ENSG00000267690.1	LDLRAD4-AS1	1	0.0142701
Adipose_Subcutaneous	2_33784135_A_G_b37	ENSG00000152689.13	RASGRP3	0.946313	ENSG00000152601.13	MBNL1	0.997977	0.0017499
Adipose_Subcutaneous	10_5038464_A_G_b37	ENSG00000224251.2	RP11-499O7.7	0.603668	ENSG00000247950.2	SEC24B-AS1	0.97449	0.085982
Adipose_Subcutaneous	14_94554847_T_TTTTC_b37	ENSG00000165948.6	IFI27L1	0.986853	ENSG00000249407.1	IL20RB-AS1	1	0.0409871
Adipose_Subcutaneous	4_108661082_T_G_b37	ENSG00000138801.4	PAPSS1	1	ENSG00000223821.1	RP11-505P4.6	1	0.0215902
Adipose_Subcutaneous	1_20415701_A_T_b37	ENSG00000162543.5	UBXN10	1	ENSG00000198829.5	SUCNR1	0.995622	0.00852354
Adipose_Subcutaneous	17_18548418_A_C_b37	ENSG00000154874.10	CCDC144B	0.353022	ENSG00000143753.8	DEGS1	0.871924	0.046709
Adipose_Subcutaneous	17_80382929_A_G_b37	ENSG00000169660.11	HEXDC	0.969918	ENSG00000188827.6	SLX4	0.935285	0.0241765
Adipose_Subcutaneous	2_64816360_G_A_b37	ENSG00000119844.10	AFTPH	0.996347	ENSG00000186150.3	UBL4B	1	0.0689874
Adipose_Subcutaneous	7_27138829_G_A_b37	ENSG00000233429.5	HOTAIRM1	1	ENSG00000259886.1		1	0.015534
Adipose_Subcutaneous	2_50762448_A_G_b37	ENSG00000179915.16	NRXN1	0.996206	ENSG00000148826.6	NKX6-2	1	4.20197e-12
Adipose_Subcutaneous	3_44350264_A_G_b37	ENSG00000179152.14	TCAIM	0.96927	ENSG00000179761.7	PIPOX	0.922135	0.0535861
Adipose_Subcutaneous	2_232409405_G_C_b37	ENSG00000171596.6	NMUR1	0.92093	ENSG00000261978.1	CTD-2529O21.2	1	0.00514721
Adipose_Subcutaneous	20_16553107_TC_T_b37	ENSG00000089177.13	KIF16B	0.998977	ENSG00000259627.1	RP11-244F12.2	1	0.0322698
Adipose_Subcutaneous	17_48788882_G_A_b37	ENSG00000154945.6	ANKRD40	0.934707	ENSG00000203786.5	KPRP	1	0.00114368
Adipose_Subcutaneous	7_19791585_A_C_b37	ENSG00000105849.5	TWISTNB	0.995472	ENSG00000112996.5	MRPS30	1	0.000134506
Adipose_Subcutaneous	19_46877975_C_T_b37	ENSG00000011485.10	PPP5C	0.994889	ENSG00000175544.9	CABP4	0.965984	0.0119699
Adipose_Subcutaneous	10_99327139_A_G_b37	ENSG00000171307.14	ZDHHC16	0.998511	ENSG00000112473.12	SLC39A7	1	1.26284e-05
Adipose_Subcutaneous	3_20027232_G_T_b37	ENSG00000183977.9	PP2D1	0.998368	ENSG00000185274.7	WBSCR17	0.999817	0.0324963
Adipose_Subcutaneous	3_52890521_AC_A_b37	ENSG00000213533.7	TMEM110	0.99956	ENSG00000227474.1	RP11-295P9.2	0.980169	0.0368806
Adipose_Subcutaneous	19_37925182_CA_C_b37	ENSG00000181666.13	HKR1	0.87114	ENSG00000138463.8	DIRC2	1	0.0307039
Adipose_Subcutaneous	8_134468864_G_A_b37	ENSG00000008513.10	ST3GAL1	0.935274	ENSG00000108405.3	P2RX1	1	0.0602448
Adipose_Subcutaneous	16_2013756_T_C_b37	ENSG00000255513.1	AC005363.9	0.98556	ENSG00000214753.2	HNRNPUL2	1	0.004259
Adipose_Subcutaneous	1_21915085_C_T_b37	ENSG00000142789.15	CELA3A	0.798321	ENSG00000137392.5	CLPS	1	0
Adipose_Subcutaneous	1_21915085_C_T_b37	ENSG00000219073.3	CELA3B	0.735663	ENSG00000137392.5	CLPS	1	0
Adipose_Subcutaneous	18_59258218_C_T_b37	ENSG00000267279.1	RP11-879F14.2	1	ENSG00000062598.13	ELMO2	0.976095	0.0315391
Adipose_Subcutaneous	8_27810603_C_G_b37	ENSG00000168079.12	SCARA5	0.998767	ENSG00000178935.5	ZNF552	0.748835	0.0425744
Adipose_Subcutaneous	15_32273716_G_A_b37	ENSG00000254912.2	RP11-632K20.2	0.469237	ENSG00000269930.1	RP11-932O9.9	0.119838	6.66689e-05
Adipose_Subcutaneous	11_111519000_ATACCT_A_b37	ENSG00000204370.4	SDHD	0.567944	ENSG00000163406.6	SLC15A2	0.943135	0.000626682
Adipose_Subcutaneous	2_46847564_GT_G_b37	ENSG00000151665.8	PIGF	0.835741	ENSG00000255089.1	RP11-326C3.10	0.154665	0.0819291
Adipose_Subcutaneous	9_44163118_C_T_b37	ENSG00000154529.10	CNTNAP3B	0.241769	ENSG00000235310.1	GXYLT1P6	0.316292	0.0302409
Adipose_Subcutaneous	5_14532184_T_C_b37	ENSG00000145569.5	FAM105A	0.988926	ENSG00000165102.10	HGSNAT	0.913669	0.047339
Adipose_Subcutaneous	11_10476689_A_G_b37	ENSG00000133805.11	AMPD3	0.987986	ENSG00000136490.4	LIMD2	0.998906	0.0366214
Adipose_Subcutaneous	6_30629152_T_G_b37	ENSG00000204560.5	DHX16	1	ENSG00000112249.9	ASCC3	0.998146	0.00903999
Adipose_Subcutaneous	15_83236014_G_C_b37	ENSG00000255769.3	GOLGA2P10;RP11-152F13.3	0.175728	ENSG00000270690.1	RP11-349G13.3	1	0.0473239
Adipose_Subcutaneous	19_16916687_C_T_b37	ENSG00000127526.9	SLC35E1	0.871943	ENSG00000147650.7	LRP12	0.98626	0.0135962
Adipose_Subcutaneous	2_113312179_A_ATC_b37	ENSG00000125611.11	CHCHD5	0.929793	ENSG00000165775.13	FUNDC2	0.951132	0.00289141
Adipose_Subcutaneous	20_62273015_T_C_b37	ENSG00000130589.12	HELZ2	0.918539	ENSG00000135114.8	OASL	0.969648	0
Adipose_Subcutaneous	12_22435394_T_G_b37	ENSG00000111728.6	ST8SIA1	0.968909	ENSG00000167880.3	EVPL	0.967672	0.0058713
Adipose_Subcutaneous	21_40711959_G_A_b37	ENSG00000183527.7	PSMG1	0.959366	ENSG00000262758.1	CTD-3195I5.1	1	0.0616351
Adipose_Subcutaneous	1_161978294_C_T_b37	ENSG00000152332.11	UHMK1	0.974919	ENSG00000273489.1	RP11-180C16.1	1	0.0694755
Adipose_Subcutaneous	4_151971437_G_A_b37	ENSG00000270681.1	RP11-372K14.2	1	ENSG00000239719.1		0.280841	0.00724248
Adipose_Subcutaneous	16_29993686_G_C_b37	ENSG00000169592.10	INO80E	1	ENSG00000164828.13	SUN1	0.961115	0.0628606
Adipose_Subcutaneous	3_195374868_G_A_b37	ENSG00000061938.12	TNK2	0.981772	ENSG00000270412.1	RP11-92C4.6	1	0.0224419
Adipose_Subcutaneous	2_74658195_T_TA_b37	ENSG00000115307.12	AUP1	1	ENSG00000257761.1	RP11-186F10.2	1	0.0178302
Adipose_Subcutaneous	10_62624715_C_G_b37	ENSG00000072422.12	RHOBTB1	1	ENSG00000204099.7	NEU4	0.987976	0.0655484
Adipose_Subcutaneous	16_88760100_G_A_b37	ENSG00000185669.5	SNAI3	1	ENSG00000272597.1	RP11-446H18.6	1	0.0651024
Adipose_Subcutaneous	16_66717073_TATATAC_T_b37	ENSG00000183723.8	CMTM4	0.998615	ENSG00000104808.3	DHDH	1	0.0454702
Adipose_Subcutaneous	1_21915085_C_T_b37	ENSG00000142789.15	CELA3A	0.798321	ENSG00000169347.12	GP2	0.941224	0
Adipose_Subcutaneous	1_21915085_C_T_b37	ENSG00000219073.3	CELA3B	0.735663	ENSG00000169347.12	GP2	0.941224	0
Adipose_Subcutaneous	11_66651031_G_A_b37	ENSG00000173898.7	SPTBN2	1	ENSG00000242676.3		0.185976	0.0179877
Adipose_Subcutaneous	7_123864729_G_A_b37	ENSG00000128609.10	NDUFA5	0.925758	ENSG00000186575.13	NF2	0.909837	0.000920157
Adipose_Subcutaneous	12_120146925_G_A_b37	ENSG00000111725.6	PRKAB1	0.925783	ENSG00000237214.2	RP11-12M9.3	0.704827	0.00784175
Adipose_Subcutaneous	1_89791328_C_A_b37	ENSG00000162645.8	GBP2	0.971702	ENSG00000225864.1	HCG4P11	1	1.2988e-06
Adipose_Subcutaneous	12_48745051_C_T_b37	ENSG00000167528.8	ZNF641	1	ENSG00000065548.13	ZC3H15	1	0.0195497
Adipose_Subcutaneous	2_161761125_TTTAAATCATCTCTAGATTAC_T_b37	ENSG00000226121.1	AHCTF1P1	0.697125	ENSG00000146242.5	TPBG	0.999877	0.0426433
Adipose_Subcutaneous	7_128209858_C_T_b37	ENSG00000230715.2	RP11-274B21.4	0.292784	ENSG00000226220.1	CICP22	0.223749	0.00603605
Adipose_Subcutaneous	1_226197196_G_A_b37	ENSG00000234112.2	RP11-145A3.4	0.933921	ENSG00000025293.11	PHF20	0.946108	0.0982306
Adipose_Subcutaneous	3_10087959_G_C_b37	ENSG00000144554.6	FANCD2	0.845107	ENSG00000161999.7	JMJD8	0.986145	0.0490326
Adipose_Subcutaneous	6_101225631_T_C_b37	ENSG00000164418.15	GRIK2	0.966352	ENSG00000162517.8	PEF1	0.932923	0.068531
Adipose_Subcutaneous	17_19143041_C_T_b37	ENSG00000230197.2	RP11-160E2.17	0.333333	ENSG00000174093.6	RP11-1407O15.2	0.429529	0.0191086
Adipose_Subcutaneous	1_2293791_G_C_b37	ENSG00000157916.14	RER1	0.999897	ENSG00000177951.13	BET1L	0.965318	0.0641226
Adipose_Subcutaneous	17_66575745_G_A_b37	ENSG00000108950.7	FAM20A	1	ENSG00000265500.1	SENP3-EIF4A1	0.858578	0.0058934
Adipose_Subcutaneous	19_35153867_A_AC_b37	ENSG00000256383.1	AC020910.2	0.981556	ENSG00000136143.9	SUCLA2	0.873011	0.0108711
Adipose_Subcutaneous	2_136554797_T_C_b37	ENSG00000115866.6	DARS	0.993438	ENSG00000254542.1	NAV2-AS3	1	0.0550365
Adipose_Subcutaneous	20_25244120_C_A_b37	ENSG00000197586.8	ENTPD6	1	ENSG00000079459.8	FDFT1	0.958556	0.0943996
Adipose_Subcutaneous	2_175640848_A_T_b37	ENSG00000128656.9	CHN1	0.990815	ENSG00000224985.1		1	0.00408675
Adipose_Subcutaneous	2_232214498_C_A_b37	ENSG00000224376.1	AC017104.6	1	ENSG00000126947.7	ARMCX1	1	0.0129349
Adipose_Subcutaneous	14_37663192_C_G_b37	ENSG00000151338.14	MIPOL1	0.727929	ENSG00000243562.2	RN7SL838P	1	0.028011
Adipose_Subcutaneous	10_51807210_T_C_b37	ENSG00000099290.11	FAM21A	0.306151	ENSG00000259134.1	LINC00924	0.92305	0.007596
Adipose_Subcutaneous	6_32491987_T_G_b37	ENSG00000204435.9	CSNK2B	1	ENSG00000144228.4	SPOPL	0.950025	0.0968231
Adipose_Subcutaneous	17_39985586_C_T_b37	ENSG00000141698.12	NT5C3B	0.908129	ENSG00000240793.1	UBA52P8	1	0.0110023
Adipose_Subcutaneous	5_78385845_T_G_b37	ENSG00000145692.10	BHMT	0.979384	ENSG00000141837.14	CACNA1A	0.996772	0.00972024
Adipose_Subcutaneous	10_129583408_AT_A_b37	ENSG00000186766.7	FOXI2	0.940627	ENSG00000243819.3	RN7SL832P	0.953621	0.0867939
Adipose_Subcutaneous	6_97639725_C_T_b37	ENSG00000146263.7	MMS22L	0.964402	ENSG00000187840.4	EIF4EBP1	0.967014	0.0380758
Adipose_Subcutaneous	19_55467077_T_C_b37	ENSG00000022556.11	NLRP2	0.867608	ENSG00000183090.5	FREM3	1	0.0713318
Adipose_Subcutaneous	5_169675693_AT_A_b37	ENSG00000249601.2	CTB-27N1.1;LINC01187	1	ENSG00000235529.1	AGAP1-IT1	1	0.0351963
Adipose_Subcutaneous	19_19897424_T_C_b37	ENSG00000267419.1	CTC-559E9.6	0.922976	ENSG00000268852.1	AC132872.2	0.887411	0.0200275
Adipose_Subcutaneous	1_21915085_C_T_b37	ENSG00000142789.15	CELA3A	0.798321	ENSG00000168925.6	CTRB1	0.805819	0
Adipose_Subcutaneous	1_21915085_C_T_b37	ENSG00000219073.3	CELA3B	0.735663	ENSG00000168925.6	CTRB1	0.805819	0
Adipose_Subcutaneous	22_24881781_C_T_b37	ENSG00000100024.10	UPB1	0.970045	ENSG00000260253.1		1	0.0350544
Adipose_Subcutaneous	12_54519323_A_AC_b37	ENSG00000123388.4	HOXC11	1	ENSG00000160087.16	UBE2J2	1	0.0988762
Adipose_Subcutaneous	16_10968336_T_C_b37	ENSG00000262151.1	RP11-876N24.2	1	ENSG00000242574.4	HLA-DMB	0.988693	5.973e-14
Adipose_Subcutaneous	3_82575052_T_C_b37	ENSG00000114480.8	GBE1	0.981974	ENSG00000144724.14	PTPRG	1	0.00192891
Adipose_Subcutaneous	15_76192429_A_G_b37	ENSG00000140367.7	UBE2Q2	0.98523	ENSG00000163159.7	VPS72	1	0.0346152
Adipose_Subcutaneous	2_165818338_T_A_b37	ENSG00000224490.1	AC010127.5;TTC21B-AS1	1	ENSG00000226479.3	TMEM185B	0.980653	0.0509591
Adipose_Subcutaneous	2_132236310_T_G_b37	ENSG00000163040.10	CCDC74A	0.552617	ENSG00000152076.14	CCDC74B	0.535546	1.11553e-11
Adipose_Subcutaneous	9_124236238_G_A_b37	ENSG00000106852.11	LHX6	1	ENSG00000260922.1	RP11-538I12.3	1	2.1203e-05
Adipose_Subcutaneous	9_22767164_C_A_b37	ENSG00000234840.1	LINC01239;RP11-399D6.2	0.967866	ENSG00000157036.8	EXOG	0.944527	0.0965021
Adipose_Subcutaneous	8_72427121_T_G_b37	ENSG00000104313.13	EYA1	0.99815	ENSG00000116132.7	PRRX1	0.993732	0.00245855
Adipose_Subcutaneous	1_2121118_C_T_b37	ENSG00000182873.4	RP11-181G12.2	0.977358	ENSG00000164961.11	KIAA0196	1	0.0323055
Adipose_Subcutaneous	15_65547815_A_G_b37	ENSG00000138615.4	CILP	1	ENSG00000049540.12	ELN	0.991023	0.0347724
Adipose_Subcutaneous	2_30024901_C_G_b37	ENSG00000213626.7	LBH	0.992061	ENSG00000177697.13	CD151	0.881683	0.0908981
Adipose_Subcutaneous	18_8965427_G_A_b37	ENSG00000265413.1	RP11-789C17.1	1	ENSG00000182180.9	MRPS16	0.801437	0.00201498
Adipose_Subcutaneous	10_96744731_TC_T_b37	ENSG00000173124.10	ACSM6;C10orf129	0.950754	ENSG00000242261.1	RP11-62J1.3	1	0.0115666
Adipose_Subcutaneous	1_159941860_G_A_b37	ENSG00000224259.1	LINC01133;RP11-48O20.4	0.954394	ENSG00000183128.7	CALHM3	1	0.0584423
Adipose_Subcutaneous	4_188447277_GA_G_b37	ENSG00000250658.1	RP11-138B4.1	0.75385	ENSG00000113249.8	HAVCR1	0.840758	0.0922194
Adipose_Subcutaneous	17_65516528_A_T_b37	ENSG00000266717.1	RP11-855A2.3	0.999109	ENSG00000027075.9	PRKCH	0.99586	0.0258121
Adipose_Subcutaneous	1_77957618_T_A_b37	ENSG00000226415.1	TPI1P1	0.791913	ENSG00000111669.10	TPI1	0.836246	0
Adipose_Subcutaneous	7_128318168_A_G_b37	ENSG00000229413.1	AC018638.1	0.163782	ENSG00000225119.3	LINC00999	0.0832838	0.0137321
Adipose_Subcutaneous	17_4704678_G_A_b37	ENSG00000262165.1	RP11-81A22.5	1	ENSG00000223723.1		0.9047	0.000111748
Adipose_Subcutaneous	8_37909118_T_C_b37	ENSG00000129691.11	ASH2L	0.966609	ENSG00000197021.4	CXorf40B	0.671198	0.0263084
Adipose_Subcutaneous	2_50762448_A_G_b37	ENSG00000179915.16	NRXN1	0.996206	ENSG00000100146.12	SOX10	0.998668	0
Adipose_Subcutaneous	5_168599851_A_G_b37	ENSG00000120137.6	PANK3	0.921671	ENSG00000180806.4	HOXC9	1	0.00551626
Adipose_Subcutaneous	5_1920932_TAA_T_b37	ENSG00000248994.1	RP11-259O2.1	1	ENSG00000261555.1		1	0.0286878
Adipose_Subcutaneous	11_75392559_G_A_b37	ENSG00000171533.7	MAP6	1	ENSG00000049769.8	PPP1R3F	0.991134	0.0886228
Adipose_Subcutaneous	12_131833106_G_A_b37	ENSG00000061936.5	SFSWAP	0.99518	ENSG00000185201.12	IFITM2	0.670157	0.0942816
Adipose_Subcutaneous	2_74119662_C_T_b37	ENSG00000115317.7	HTRA2	1	ENSG00000260495.1	RP11-55K13.1	0.95497	0.0479718
Adipose_Subcutaneous	17_6905061_T_G_b37	ENSG00000262089.1	RP11-589P10.5	1	ENSG00000198286.5	CARD11	0.999278	0.0813862
Adipose_Subcutaneous	7_141362693_A_T_b37	ENSG00000270157.1	RP5-894A10.6	1	ENSG00000181444.8	ZNF467	1	0.0583533
Adipose_Subcutaneous	7_141362693_A_T_b37	ENSG00000244701.1	RP5-894A10.2	0.979904	ENSG00000181444.8	ZNF467	1	0.0135552
Adipose_Subcutaneous	4_140415157_G_C_b37	ENSG00000109390.7	NDUFC1	1	ENSG00000157992.8	KRTCAP3	1	0.0364664
Adipose_Subcutaneous	19_46244607_GA_G_b37	ENSG00000245598.2	DACT3-AS1	1	ENSG00000185483.7	ROR1	0.990787	0.0869815
Adipose_Subcutaneous	10_117997389_G_A_b37	ENSG00000187021.10	PNLIPRP1	0.990433	ENSG00000137392.5	CLPS	1	0
Adipose_Subcutaneous	12_27124528_GATTT_G_b37	ENSG00000247903.1	RP11-421F16.3	0.978738	ENSG00000135482.2	ZC3H10	1	0.0822099
Adipose_Subcutaneous	19_8272163_G_A_b37	ENSG00000090661.7	CERS4	0.953692	ENSG00000196436.7	NPIPB15	0.280708	0.0822365
Adipose_Subcutaneous	8_17001229_C_T_b37	ENSG00000038945.10	MSR1	0.973279	ENSG00000232316.1	RP1-124C6.1	1	0.00901579
Adipose_Subcutaneous	3_132188163_A_G_b37	ENSG00000138246.11	DNAJC13	0.998692	ENSG00000172939.4	OXSR1	1	0.00385509
Adipose_Subcutaneous	11_6667353_A_G_b37	ENSG00000166333.9	ILK	1	ENSG00000260032.1	LINC00657	0.572808	0.0705593
Adipose_Subcutaneous	1_2124581_G_A_b37	ENSG00000269554.1	AL590822.2	0.904479	ENSG00000124532.10	MRS2	0.91035	0.0010241
Adipose_Subcutaneous	3_169609162_T_G_b37	ENSG00000008952.12	SEC62	0.967797	ENSG00000134283.13	PPHLN1	0.914628	0.0628573
Adipose_Subcutaneous	2_242697998_C_G_b37	ENSG00000180902.12	D2HGDH	0.981285	ENSG00000105875.9	WDR91	0.943729	0.0486682
Adipose_Subcutaneous	5_1578349_G_A_b37	ENSG00000251532.1	CTD-2245E15.3	1	ENSG00000184481.12	FOXO4	1	0.00672732
Adipose_Subcutaneous	12_107340089_C_CTGAG_b37	ENSG00000151135.5	C12orf23;TMEM263	0.988786	ENSG00000118160.9	SLC8A2	0.99814	0.0484753
Adipose_Subcutaneous	11_27517409_T_C_b37	ENSG00000245573.3	BDNF-AS	0.990969	ENSG00000124201.10	ZNFX1	0.892874	0.00136797
Adipose_Subcutaneous	11_10540372_A_G_b37	ENSG00000247271.2	ZBED5-AS1	1	ENSG00000269956.1	MKNK1-AS1	0.999731	0.0327649
Adipose_Subcutaneous	1_55540500_T_C_b37	ENSG00000162402.8	USP24	1	ENSG00000233588.1	CYP51A1P2	0.694671	0.0757885
Adipose_Subcutaneous	6_111346808_G_A_b37	ENSG00000197498.8	RPF2	0.910345	ENSG00000071626.12	DAZAP1	0.997256	0.00901131
Adipose_Subcutaneous	7_150124504_TGTGG_T_b37	ENSG00000196456.4	ZNF775	0.999708	ENSG00000236204.1	AC092594.1;LINC01376	0.913469	0.0553238
Adipose_Subcutaneous	21_42689637_G_T_b37	ENSG00000183844.12	FAM3B	1	ENSG00000164346.5	NSA2	0.777344	0.0618608
Adipose_Subcutaneous	19_17973573_G_A_b37	ENSG00000105640.8	RPL18A	0.948112	ENSG00000147679.7	UTP23	0.932348	0.0964028
Adipose_Subcutaneous	7_56121304_G_A_b37	ENSG00000146731.6	CCT6A	0.904013	ENSG00000128590.4	DNAJB9	0.998402	0.0272493
Adipose_Subcutaneous	5_132108685_G_A_b37	ENSG00000164402.9	2016-09-08	0.993374	ENSG00000011105.7	TSPAN9	0.997921	0.0187012
Adipose_Subcutaneous	9_115973393_T_C_b37	ENSG00000119321.4	FKBP15	0.999788	ENSG00000165943.4	MOAP1	0.923013	0.00047383
Adipose_Subcutaneous	8_142136964_C_T_b37	ENSG00000253210.1	RP11-809O17.1	1	ENSG00000242445.1	RPL7AP11	0.589207	0.0209777
Adipose_Subcutaneous	17_1919072_CG_C_b37	ENSG00000185924.6	RTN4RL1	0.993483	ENSG00000147121.11	KRBOX4	0.834505	0.0269526
Adipose_Subcutaneous	17_39979081_C_G_b37	ENSG00000141756.14	FKBP10	0.993485	ENSG00000264514.1	RP11-720L2.4	1	0.0963312
Adipose_Subcutaneous	1_54562444_A_G_b37	ENSG00000212670.1	AL161915.1	0.85438	ENSG00000167377.13	ZNF23	0.977772	0.0966812
Adipose_Subcutaneous	15_31040421_T_C_b37	ENSG00000178081.8	ULK4P3	0.293875	ENSG00000215304.3		0.287543	0.00347502
Adipose_Subcutaneous	14_104330432_C_A_b37	ENSG00000126214.16	KLC1	1	ENSG00000250320.1	CTD-2269F5.1	1	0.00449676
Adipose_Subcutaneous	22_43485385_T_G_b37	ENSG00000100271.12	TTLL1	0.970434	ENSG00000267062.1	CTD-2659N19.10	0.956081	0.0159287
Adipose_Subcutaneous	2_173876920_A_G_b37	ENSG00000091428.13	RAPGEF4	0.998642	ENSG00000171100.10	MTM1	1	0.0349913
Adipose_Subcutaneous	9_139245194_C_T_b37	ENSG00000213221.4	DNLZ	1	ENSG00000258524.1	NT5CP1	0.709195	0.012873
Adipose_Subcutaneous	13_115038879_A_G_b37	ENSG00000169062.10	UPF3A	0.522328	ENSG00000139344.3	AMDHD1	0.821915	0.0682823
Adipose_Subcutaneous	11_66853170_A_T_b37	ENSG00000175463.7	TBC1D10C	1	ENSG00000068366.15	ACSL4	0.922567	0.00565153
Adipose_Subcutaneous	1_201966295_TG_T_b37	ENSG00000176393.6	RNPEP	0.978683	ENSG00000117091.5	CD48	1	0.0334189
Adipose_Subcutaneous	4_8508825_A_G_b37	ENSG00000251186.1	RP11-689P11.3	1	ENSG00000124107.5	SLPI	1	0.0966642
Adipose_Subcutaneous	4_144413836_T_TA_b37	ENSG00000153147.5	SMARCA5	0.956123	ENSG00000189129.9	PLAC9	0.921408	0.00114129
Adipose_Subcutaneous	20_3886597_A_G_b37	ENSG00000125779.17	PANK2	0.942352	ENSG00000137273.3	FOXF2	0.998413	0.0620067
Adipose_Subcutaneous	7_19791585_A_C_b37	ENSG00000105849.5	TWISTNB	0.995472	ENSG00000128581.11	IFT22;RABL5	0.877024	0.000826329
Adipose_Subcutaneous	4_156740606_G_T_b37	ENSG00000185149.5	NPY2R	1	ENSG00000222009.4	BTBD19	0.96802	0.0105472
Adipose_Subcutaneous	5_134070027_C_T_b37	ENSG00000164615.3	CAMLG	0.887847	ENSG00000154035.6	C17orf103	0.961227	0.0323736
Adipose_Subcutaneous	5_128329797_G_T_b37	ENSG00000113396.8	SLC27A6	0.997949	ENSG00000250159.2	RP11-381K20.2	1	0.0452081
Adipose_Subcutaneous	4_175211187_T_A_b37	ENSG00000164118.8	CEP44	0.960946	ENSG00000248874.1	C5orf17	0.834732	0.0552796
Adipose_Subcutaneous	11_87885082_A_G_b37	ENSG00000123892.7	RAB38	1	ENSG00000259813.1	RP5-1142A6.5	1	0.0818548
Adipose_Subcutaneous	1_205704580_A_T_b37	ENSG00000069275.12	NUCKS1	0.959299	ENSG00000105732.9	ZNF574	0.972579	0.084192
Adipose_Subcutaneous	5_584319_G_A_b37	ENSG00000271781.1	CTD-2589H19.6	1	ENSG00000148840.6	PPRC1	1	0.0381738
Adipose_Subcutaneous	6_32491987_T_G_b37	ENSG00000204435.9	CSNK2B	1	ENSG00000213903.4	LTB4R	0.962114	0.0256152
Adipose_Subcutaneous	9_99617204_A_T_b37	ENSG00000188152.8	NUTM2G	0.434479	ENSG00000058262.5	SEC61A1	0.998173	0.0252496
Adipose_Subcutaneous	14_24799578_C_G_b37	ENSG00000129467.9	ADCY4	0.985923	ENSG00000270792.1	RP11-103J8.1	1	0.04396
Adipose_Subcutaneous	1_152165878_C_T_b37	ENSG00000197915.5	HRNR	0.601942	ENSG00000137634.5	NXPE4	0.926386	0.0573081
Adipose_Subcutaneous	10_46028010_T_C_b37	ENSG00000172671.15	ZFAND4	0.957367	ENSG00000272565.1	RP11-485G4.2	0.937668	0.0288141
Adipose_Subcutaneous	2_242697998_C_G_b37	ENSG00000180902.12	D2HGDH	0.981285	ENSG00000157150.4	TIMP4	1	0.0401763
Adipose_Subcutaneous	5_180285913_G_A_b37	ENSG00000196670.9	ZFP62	1	ENSG00000229897.2	SEPT7P7	0.926175	0.0994279
Adipose_Subcutaneous	16_56719077_T_G_b37	ENSG00000259827.1	RP11-343H19.2	1	ENSG00000196083.5	IL1RAP	0.976563	4.95812e-06
Adipose_Subcutaneous	16_56719077_T_G_b37	ENSG00000187193.8	MT1X	0.942885	ENSG00000196083.5	IL1RAP	0.976563	5.24036e-06
Adipose_Subcutaneous	22_21334873_G_C_b37	ENSG00000099949.14	LZTR1	1	ENSG00000157954.10	WIPI2	0.990111	0.00515321
Adipose_Subcutaneous	19_51308225_A_T_b37	ENSG00000180279.5	CTD-2568A17.5	1	ENSG00000188542.5	DUSP28	0.886675	0.0604764
Adipose_Subcutaneous	2_71024411_T_C_b37	ENSG00000075340.18	ADD2	0.980236	ENSG00000117472.5	TSPAN1	1	0.00789745
Adipose_Subcutaneous	19_36224705_A_G_b37	ENSG00000011590.9	ZBTB32	0.999327	ENSG00000254422.1	RP11-864G5.3	1	0.0485577
Adipose_Subcutaneous	11_10901401_G_A_b37	ENSG00000236287.3	ZBED5	0.990235	ENSG00000167595.10	C19orf55;PROSER3	0.876233	0.0204518
Adipose_Subcutaneous	2_242442728_T_C_b37	ENSG00000223374.1	AC005104.3	1	ENSG00000136271.6	DDX56	0.980033	0.0633837
Adipose_Subcutaneous	22_41383981_A_C_b37	ENSG00000230769.1	RP3-408N23.4	0.998801	ENSG00000117410.9	ATP6V0B	1	0.0995173
Adipose_Subcutaneous	9_132634120_C_T_b37	ENSG00000187239.12	FNBP1	0.963447	ENSG00000185101.8	ANO9	1	0.0105813
Adipose_Subcutaneous	14_92525145_A_G_b37	ENSG00000259634.1	RP11-529H20.5	1	ENSG00000184730.6	APOBR	0.978588	0.0652795
Adipose_Subcutaneous	11_75871786_C_G_b37	ENSG00000254429.1	CTD-2562J17.7	1	ENSG00000134324.7	LPIN1	0.965735	9.36185e-05
Adipose_Subcutaneous	6_88950633_TATAAA_T_b37	ENSG00000213204.4	C6orf165	1	ENSG00000197312.7	DDI2	0.9348	0.0164722
Adipose_Subcutaneous	3_127878817_T_C_b37	ENSG00000132394.6	EEFSEC	1	ENSG00000156239.7	N6AMT1	0.82773	0.0385381
Adipose_Subcutaneous	4_81975504_A_C_b37	ENSG00000152785.6	BMP3	0.977674	ENSG00000161677.7	JOSD2	0.97903	0.0361101
Adipose_Subcutaneous	11_88045811_G_GC_b37	ENSG00000109861.11	CTSC	0.845271	ENSG00000224958.1	PGM5-AS1	0.200125	0.0183048
Adipose_Subcutaneous	21_45508682_G_A_b37	ENSG00000241945.3	PWP2	1	ENSG00000065029.10	ZNF76	1	0.00351485
Adipose_Subcutaneous	14_74826582_C_T_b37	ENSG00000119636.11	BBOF1;CCDC176	0.999085	ENSG00000156502.9	SUPV3L1	0.965266	0.0331841
Adipose_Subcutaneous	14_74826582_C_T_b37	ENSG00000259114.1	AC005484.5	1	ENSG00000156502.9	SUPV3L1	0.965266	0.0615397
Adipose_Subcutaneous	6_31798287_G_A_b37	ENSG00000204392.6	LSM2	0.946614	ENSG00000119714.6	GPR68	0.998976	0.0473298
Adipose_Subcutaneous	17_65516528_A_T_b37	ENSG00000266717.1	RP11-855A2.3	0.999109	ENSG00000177076.4	ACER2	0.64209	0.00758298
Adipose_Subcutaneous	20_30449181_G_A_b37	ENSG00000171456.12	ASXL1	0.99681	ENSG00000268518.1	CTD-2545M3.8	1	0.00105861
Adipose_Subcutaneous	20_43589041_G_A_b37	ENSG00000025772.7	TOMM34	1	ENSG00000118514.9	ALDH8A1	0.926439	0.0368559
Adipose_Subcutaneous	9_13428773_C_T_b37	ENSG00000270547.1	LINC01235;RP11-536O18.2	0.95598	ENSG00000015592.12	STMN4	0.981247	0.00436923
Adipose_Subcutaneous	5_266154_A_G_b37	ENSG00000250848.1	CTD-2083E4.5	0.416209	ENSG00000244457.2	ENO1P1	0.981707	0.0507847
Adipose_Subcutaneous	16_86566115_T_C_b37	ENSG00000103248.13	MTHFSD	0.999599	ENSG00000179195.11	ZNF664	0.986468	0.0131299
Adipose_Subcutaneous	2_96514476_A_G_b37	ENSG00000231584.4	FAHD2CP	0.540183	ENSG00000137760.10	ALKBH8	0.988224	0.0849429
Adipose_Subcutaneous	8_144638679_C_T_b37	ENSG00000170727.7	BOP1	0.587936	ENSG00000177685.12	CRACR2B;EFCAB4A	1	0.00183494
Adipose_Subcutaneous	7_56117449_T_A_b37	ENSG00000106153.12	CHCHD2	0.743146	ENSG00000152760.5	TCTEX1D1	1	0.0379049
Adipose_Subcutaneous	12_114408276_A_G_b37	ENSG00000111335.8	OAS2	0.971462	ENSG00000185507.15	IRF7	1	0
Adipose_Subcutaneous	6_131456982_C_T_b37	ENSG00000118507.11	AKAP7	0.980357	ENSG00000226761.3	TAS2R46	0.832554	0.00579755
Adipose_Subcutaneous	17_76360538_A_G_b37	ENSG00000266970.1	RP11-806H10.4	0.920616	ENSG00000120725.8	SIL1	0.996385	0.0574189
Adipose_Subcutaneous	11_87885082_A_G_b37	ENSG00000123892.7	RAB38	1	ENSG00000273193.1	RP11-523G9.3	1	0.000151418
Adipose_Subcutaneous	12_89049173_CCT_C_b37	ENSG00000271327.1	RP11-1109F11.3	1	ENSG00000076258.5	FMO4	1	0.00396039
Adipose_Subcutaneous	22_42333330_C_G_b37	ENSG00000100412.11	ACO2	0.950618	ENSG00000269736.1	CTD-2521M24.11	1	0.0139721
Adipose_Subcutaneous	8_146004188_G_A_b37	ENSG00000255182.1	CTD-2517M22.14	0.985226	ENSG00000154153.9	FAM134B	0.998137	0.0287256
Adipose_Subcutaneous	7_44422074_A_G_b37	ENSG00000015676.13	NUDCD3	0.992723	ENSG00000163157.10	TMOD4	1	0.0486553
Adipose_Subcutaneous	16_771181_C_G_b37	ENSG00000140983.9	RHOT2	1	ENSG00000116815.11	CD58	1	0.0368626
Adipose_Subcutaneous	13_45946982_C_A_b37	ENSG00000170919.11	TPT1-AS1	0.795397	ENSG00000151388.6	ADAMTS12	1	0.0057835
Adipose_Subcutaneous	16_646421_A_G_b37	ENSG00000197562.5	RAB40C	0.997901	ENSG00000259929.1		0.848661	0.0243542
Adipose_Subcutaneous	1_224076743_A_G_b37	ENSG00000143514.12	TP53BP2	0.985966	ENSG00000272990.1	RP11-305K5.1	1	0.0569713
Adipose_Subcutaneous	1_26496370_C_T_b37	ENSG00000236782.1	RP11-96L14.7	1	ENSG00000214711.5	CAPN14	0.992967	0.0667553
Adipose_Subcutaneous	16_31404571_T_C_b37	ENSG00000156886.11	ITGAD	0.971335	ENSG00000237202.1	AJ239321.3	0.216259	0.0207445
Adipose_Subcutaneous	6_155190805_G_GT_b37	ENSG00000213079.5	SCAF8	0.980163	ENSG00000128311.9	TST	1	0.020101
Adipose_Subcutaneous	7_150025367_A_C_b37	ENSG00000106526.6	ACTR3C	0.547349	ENSG00000231409.3	RP11-83J16.1	0.456259	0.0488412
Adipose_Subcutaneous	5_40877294_C_CT_b37	ENSG00000132356.7	PRKAA1	0.956654	ENSG00000075413.13	MARK3	0.996733	0.00410001
Adipose_Subcutaneous	9_131685015_A_G_b37	ENSG00000175287.14	PHYHD1	0.866566	ENSG00000235552.4	RPL6P27	0.258584	0.00520358
Adipose_Subcutaneous	6_29842228_TTG_T_b37	ENSG00000233916.1	ZDHHC20P1	1	ENSG00000237815.1	AC007000.11	0.125	0.0158609
Adipose_Subcutaneous	8_67380677_C_T_b37	ENSG00000169085.7	C8orf46	0.981703	ENSG00000154822.11	PLCL2	0.999836	0.00775348
Adipose_Subcutaneous	6_136904672_C_T_b37	ENSG00000135525.14	MAP7	0.977806	ENSG00000133624.9	ZNF767;ZNF767P	0.936104	0.0387463
Adipose_Subcutaneous	19_21775371_C_T_b37	ENSG00000268278.1	RP11-420K14.1	0.885007	ENSG00000213742.2	RP4-694B14.5;ZNF337-AS1	0.996341	0.0332983
Adipose_Subcutaneous	17_48621365_T_C_b37	ENSG00000250107.1	CACNA1G-AS1	1	ENSG00000120705.8	ETF1	0.738075	0.048518
Adipose_Subcutaneous	18_13483636_G_A_b37	ENSG00000267702.1	RP11-53B2.2	0.970598	ENSG00000266283.1	RP11-627G18.1	1	0.00531003
Adipose_Subcutaneous	18_59857671_G_A_b37	ENSG00000134444.9	KIAA1468	1	ENSG00000225783.2	MIAT	1	0.0124125
Adipose_Subcutaneous	6_43009855_G_A_b37	ENSG00000112655.11	PTK7	0.967057	ENSG00000155085.11	AK9	0.977756	0.0216858
Adipose_Subcutaneous	3_153843667_T_G_b37	ENSG00000114790.8	ARHGEF26	0.972886	ENSG00000099910.12	KLHL22	0.986374	0.0179739
Adipose_Subcutaneous	14_81458761_AT_A_b37	ENSG00000165409.11	TSHR	0.999456	ENSG00000182568.12	SATB1	0.997003	0.0963015
Adipose_Subcutaneous	6_42675410_G_A_b37	ENSG00000024048.6	UBR2	0.966076	ENSG00000196072.7	BLOC1S2	0.969399	0.0197125
Adipose_Subcutaneous	1_206772194_ACT_A_b37	ENSG00000143486.11	EIF2D	0.998688	ENSG00000149485.12	FADS1	0.940395	0.0479292
Adipose_Subcutaneous	18_8965427_G_A_b37	ENSG00000265413.1	RP11-789C17.1	1	ENSG00000273175.1		1	0.0271831
Adipose_Subcutaneous	20_56579065_G_A_b37	ENSG00000218018.2	RP4-800J21.3	1	ENSG00000213355.3	CNN2P8	0.380076	0.0654516
Adipose_Subcutaneous	8_86069405_A_G_b37	ENSG00000133739.11	LRRCC1	1	ENSG00000211821.2	TRDV2	1	0.00596678
Adipose_Subcutaneous	19_7912816_C_T_b37	ENSG00000142459.4	EVI5L	0.982382	ENSG00000113504.15	SLC12A7	1	3.76462e-05
Adipose_Subcutaneous	1_3570883_C_T_b37	ENSG00000116213.11	WRAP73	0.99408	ENSG00000083937.4	CHMP2B	0.997166	0.0335336
Adipose_Subcutaneous	9_68830690_C_T_b37	ENSG00000172014.11	ANKRD20A4	0.176675	ENSG00000228522.2	RP11-236F9.2	0.349091	0.0639205
Adipose_Subcutaneous	9_68830690_C_T_b37	ENSG00000196774.3	ANKRD20A1	0.163338	ENSG00000228522.2	RP11-236F9.2	0.349091	0.032932
Adipose_Subcutaneous	10_135290516_C_A_b37	ENSG00000273336.1	OR7M1P	1	ENSG00000070540.8	WIPI1	0.981367	0.0216594
Adipose_Subcutaneous	12_52634956_C_T_b37	ENSG00000135480.10	KRT7	1	ENSG00000250567.1		1	0.0727567
Adipose_Subcutaneous	2_112790104_T_C_b37	ENSG00000153214.5	TMEM87B	1	ENSG00000111640.10	GAPDH	0.862826	0.000111602
Adipose_Subcutaneous	2_71114721_T_C_b37	ENSG00000152672.3	CLEC4F	1	ENSG00000224512.2	AC021593.1	1	0.0828976
Adipose_Subcutaneous	10_117997389_G_A_b37	ENSG00000187021.10	PNLIPRP1	0.990433	ENSG00000169347.12	GP2	0.941224	0
Adipose_Subcutaneous	12_108858942_G_A_b37	ENSG00000198855.2	FICD	0.999931	ENSG00000144867.7	SRPRB	0.999441	1.01289e-07
Adipose_Subcutaneous	6_168361758_A_AAT_b37	ENSG00000130396.16	MLLT4	0.997103	ENSG00000163069.8	SGCB	0.95248	0.0769168
Adipose_Subcutaneous	19_48616658_C_A_b37	ENSG00000105486.9	LIG1	1	ENSG00000242071.2	RPL7AP6	0.404774	0.0643556
Adipose_Subcutaneous	1_6690930_G_C_b37	ENSG00000041988.11	THAP3	0.953454	ENSG00000170348.4	TMED10	0.791239	0.0911649
Adipose_Subcutaneous	5_1181651_G_A_b37	ENSG00000249201.2	CTD-3080P12.3	0.965945	ENSG00000122692.7	SMU1	0.866502	0.0415789
Adipose_Subcutaneous	19_544728_C_CA_b37	ENSG00000267092.1	CTB-25B13.9	1	ENSG00000011405.9	PIK3C2A	0.964007	0.0531386
Adipose_Subcutaneous	7_45809522_C_T_b37	ENSG00000214765.4	SEPT7P2	0.722672	ENSG00000005844.13	ITGAL	0.949208	0.0232361
Adipose_Subcutaneous	14_24129048_T_TA_b37	ENSG00000092010.10	PSME1	1	ENSG00000185880.8	TRIM69	0.934046	6.65075e-10
Adipose_Subcutaneous	4_175035142_G_A_b37	ENSG00000248174.1	RP11-148L24.1	0.975029	ENSG00000271075.1	RP11-589M4.4	1	0.0837199
Adipose_Subcutaneous	3_63622640_G_A_b37	ENSG00000163637.7	PRICKLE2	1	ENSG00000124215.12	CDH26	0.991774	0.0140026
Adipose_Subcutaneous	6_32153409_A_C_b37	ENSG00000273333.1	XXbac-BPG300A18.13	0.778543	ENSG00000253570.1	RNF5P1	0.803648	0.0314337
Adipose_Subcutaneous	6_19206895_G_A_b37	ENSG00000172201.6	ID4	0.986897	ENSG00000117016.5	RIMS3	0.999274	0.080545
Adipose_Subcutaneous	3_19988437_G_C_b37	ENSG00000163576.13	EFHB	0.976809	ENSG00000246067.3	RAB30-AS1	0.985484	0.0941546
Adipose_Subcutaneous	1_212587320_T_C_b37	ENSG00000065600.8	TMEM206	1	ENSG00000185246.13	PRPF39	0.994037	0.0609314
Adipose_Subcutaneous	2_220062819_T_G_b37	ENSG00000213901.6	SLC23A3	0.99307	ENSG00000119705.5	SLIRP	0.841913	0.0173466
Adipose_Subcutaneous	17_17870778_A_G_b37	ENSG00000171953.11	ATPAF2	0.999934	ENSG00000198019.8	FCGR1B	0.388729	0.0861482
Adipose_Subcutaneous	10_89481779_G_A_b37	ENSG00000198682.8	PAPSS2	0.994627	ENSG00000196776.10	CD47	0.996503	0.000197987
Adipose_Subcutaneous	13_53181503_A_G_b37	ENSG00000250299.1	MRPS31P4	0.813152	ENSG00000128487.12	SPECC1	0.849562	0.0979973
Adipose_Subcutaneous	10_17845187_C_T_b37	ENSG00000148483.7	TMEM236	0.450862	ENSG00000122406.8	RPL5	0.801037	0.0537812
Adipose_Subcutaneous	17_41004503_G_A_b37	ENSG00000260105.2	AOC4P	0.790021	ENSG00000163491.12	NEK10	0.987868	0.0574256
Adipose_Subcutaneous	11_57151504_C_T_b37	ENSG00000186652.5	PRG2	1	ENSG00000174456.9	C12orf76	0.790843	0.0076837
Adipose_Subcutaneous	20_3776368_T_C_b37	ENSG00000101224.13	CDC25B	0.999802	ENSG00000171606.13	ZNF274	0.976167	0.0871247
Adipose_Subcutaneous	6_49525771_T_C_b37	ENSG00000146085.7	MUT	0.994771	ENSG00000229117.4	RPL41	0.668388	0.0286579
Adipose_Subcutaneous	12_16054913_G_GGTTTT_b37	ENSG00000023734.6	STRAP	0.858844	ENSG00000115758.8	ODC1	0.982793	0.000798775
Adipose_Subcutaneous	19_23968759_G_A_b37	ENSG00000196172.8	ZNF681	0.881087	ENSG00000105877.13	DNAH11	0.981168	0.0564587
Adipose_Subcutaneous	16_70449124_C_T_b37	ENSG00000198373.8	WWP2	0.986608	ENSG00000184545.6	DUSP8	0.854506	0.0112429
Adipose_Subcutaneous	12_22663087_T_C_b37	ENSG00000111731.8	C2CD5	0.978147	ENSG00000148498.11	PARD3	1	0.00232357
Adipose_Subcutaneous	20_19112927_TA_T_b37	ENSG00000185052.7	SLC24A3	1	ENSG00000253636.1	RP11-531A24.5	0.987865	0.0979289
Adipose_Subcutaneous	6_30344281_C_T_b37	ENSG00000204574.8	ABCF1	0.840879	ENSG00000106012.13	IQCE	0.990154	0.0149922
Adipose_Subcutaneous	6_38679768_C_T_b37	ENSG00000124767.6	GLO1	1	ENSG00000240449.1	RP4-584D14.5	1	0.0324213
Adipose_Subcutaneous	14_96504285_G_A_b37	ENSG00000227051.4	C14orf132	0.978224	ENSG00000106034.13	CPED1	0.951532	0.0270187
Adipose_Subcutaneous	8_10865139_C_A_b37	ENSG00000246477.2	AF131216.6	0.995595	ENSG00000151657.7	KIN	0.886338	0.00822393
Adipose_Subcutaneous	10_135213854_C_T_b37	ENSG00000214279.8	RP11-108K14.4	0.980939	ENSG00000184486.7	POU3F2	0.99918	0.0161818
Adipose_Subcutaneous	7_99935097_G_A_b37	ENSG00000078487.13	ZCWPW1	1	ENSG00000257681.1	RP11-341G23.4	1	0.0802633
Adipose_Subcutaneous	1_145395604_T_C_b37	ENSG00000213240.7	NOTCH2NL	0.537508	ENSG00000157657.10	ZNF618	0.988661	0.0458317
Adipose_Subcutaneous	10_48656269_G_C_b37	ENSG00000227781.4	GLUD1P2	0.239311	ENSG00000231187.2	RP11-38L15.3	0.775033	0.0227431
Adipose_Subcutaneous	19_1581750_G_C_b37	ENSG00000064932.11	SBNO2	0.978132	ENSG00000160271.10	RALGDS	1	1.20925e-08
Adipose_Subcutaneous	6_31798287_G_A_b37	ENSG00000204392.6	LSM2	0.946614	ENSG00000177855.8	CACYBPP2	0.807947	0.0419735
Adipose_Subcutaneous	14_101669090_G_A_b37	ENSG00000100811.6	YY1	0.963513	ENSG00000197077.8	KIAA1671	0.976764	0.0276785
Adipose_Subcutaneous	16_88763151_G_A_b37	ENSG00000259813.1	RP5-1142A6.5	1	ENSG00000155087.3	ODF1	1	0.0980661
Adipose_Subcutaneous	1_2124581_G_A_b37	ENSG00000269554.1	AL590822.2	0.904479	ENSG00000129128.8	SPCS3	0.966907	0.0101199
Adipose_Subcutaneous	9_88356677_G_A_b37	ENSG00000135049.11	AGTPBP1	0.99972	ENSG00000140854.8	KATNB1	1	0.0680605
Adipose_Subcutaneous	20_58170402_G_A_b37	ENSG00000087495.12	PHACTR3	0.998319	ENSG00000187678.8	SPRY4	0.996396	0.0840273
Adipose_Subcutaneous	20_34137545_C_A_b37	ENSG00000149646.8	CNBD2	0.958394	ENSG00000230701.1	FBXW4P1	0.981223	0.0775324
Adipose_Subcutaneous	6_50081818_A_G_b37	ENSG00000170950.3	PGK2	0.998277	ENSG00000164050.8	PLXNB1	1	0.0754766
Adipose_Subcutaneous	5_80526919_G_C_b37	ENSG00000248794.1	CTD-2248H3.1	0.800255	ENSG00000165861.9	ZFYVE1	0.93284	0.00171385
Adipose_Subcutaneous	1_203155882_G_C_b37	ENSG00000133048.8	CHI3L1	0.983248	ENSG00000258811.1	CTD-3051D23.1	1	0.0170274
Adipose_Subcutaneous	12_121290706_A_T_b37	ENSG00000122971.4	ACADS	1	ENSG00000076321.6	KLHL20	0.999909	0.0186232
Adipose_Subcutaneous	15_74284805_C_G_b37	ENSG00000067221.9	STOML1	1	ENSG00000180422.3	LINC00304	0.995186	0.0459752
Adipose_Subcutaneous	7_127272820_G_A_b37	ENSG00000197157.6	SND1	0.996568	ENSG00000196531.6	NACA	0.888736	0.0237035
Adipose_Subcutaneous	6_125477069_C_A_b37	ENSG00000111907.16	TPD52L1	0.954441	ENSG00000226525.4	RPS7P10	0.448708	0.0117146
Adipose_Subcutaneous	3_64995323_A_T_b37	ENSG00000241684.1	ADAMTS9-AS2	1	ENSG00000171471.5	MAP1LC3B2	0.668847	0.0406921
Adipose_Subcutaneous	11_73500926_G_T_b37	ENSG00000175581.9	MRPL48	0.78461	ENSG00000126467.6	TSKS	1	0.0506808
Adipose_Subcutaneous	17_29153998_C_T_b37	ENSG00000176390.10	CRLF3	0.872544	ENSG00000178691.6	SUZ12	0.89553	0.00467124
Adipose_Subcutaneous	20_33187130_G_A_b37	ENSG00000101460.8	MAP1LC3A	1	ENSG00000249238.1	BCL9P1	1	0.077012
Adipose_Subcutaneous	9_99532893_AAAT_A_b37	ENSG00000158122.7	AAED1	0.751901	ENSG00000232160.2	RAP2C-AS1	1	0.0930711
Adipose_Subcutaneous	22_50052921_G_A_b37	ENSG00000188511.8	C22orf34	0.972788	ENSG00000116819.6	TFAP2E	1	0.0235402
Adipose_Subcutaneous	10_67316802_T_A_b37	ENSG00000228065.6	LINC01515;RP11-222A11.1	0.98792	ENSG00000248909.1	HMGB1P21	0.970907	0.055474
Adipose_Subcutaneous	1_46592414_C_T_b37	ENSG00000159588.10	CCDC17	0.998634	ENSG00000267658.1	RP11-358B23.1	1	0.0750459
Adipose_Subcutaneous	6_50081818_A_G_b37	ENSG00000170950.3	PGK2	0.998277	ENSG00000203942.3	C10orf62	1	3.93019e-13
Adipose_Subcutaneous	3_56579538_C_T_b37	ENSG00000180376.12	CCDC66	0.936254	ENSG00000236013.1	RP3-332B22.1	1	0.0178128
Adipose_Subcutaneous	12_49985408_G_A_b37	ENSG00000187778.9	MCRS1	1	ENSG00000164068.11	RNF123	0.983194	0.00012051
Adipose_Subcutaneous	7_44131834_C_T_b37	ENSG00000214783.5	POLR2J4	0.938134	ENSG00000118873.11	RAB3GAP2	0.97261	0.00252509
Adipose_Subcutaneous	11_73773783_T_C_b37	ENSG00000168014.12	C2CD3	0.824473	ENSG00000132464.7	ENAM	0.996523	0.0764877
Adipose_Subcutaneous	10_11670862_G_A_b37	ENSG00000271360.1	RP11-138I18.1	1	ENSG00000233461.1	RP11-295G20.2	0.924132	0.0451617
Adipose_Subcutaneous	12_49687378_G_A_b37	ENSG00000135406.9	PRPH	0.999831	ENSG00000100592.11	DAAM1	0.997324	0.00470083
Adipose_Subcutaneous	11_77774599_T_C_b37	ENSG00000246174.3	KCTD21-AS1	0.929051	ENSG00000182600.5	C2orf82	1	0.00319032
Adipose_Subcutaneous	2_58848949_A_G_b37	ENSG00000028116.12	VRK2	0.978516	ENSG00000165312.5	OTUD1	0.990967	0.0206114
Adipose_Subcutaneous	8_79649057_G_C_b37	ENSG00000254352.1	RP11-578O24.2	1	ENSG00000188021.7	UBQLN2	0.999367	0.0707509
Adipose_Subcutaneous	7_134833214_C_A_b37	ENSG00000146856.10	AGBL3	0.989803	ENSG00000164684.9	ZNF704	0.992413	0.0710379
Adipose_Subcutaneous	8_41524899_A_G_b37	ENSG00000029534.15	ANK1	0.999783	ENSG00000256553.1	TRAV1-2	0.977072	0.0185676
Adipose_Subcutaneous	17_5132316_T_C_b37	ENSG00000263164.1	RP11-333E1.2	0.736232	ENSG00000172725.9	CORO1B	0.999872	0.0159468
Adipose_Subcutaneous	10_32963050_G_A_b37	ENSG00000150093.14	ITGB1	0.785844	ENSG00000273056.1	RP11-77E14.2	1	0.0805268
Adipose_Subcutaneous	19_52438347_T_C_b37	ENSG00000197619.9	ZNF615	0.906439	ENSG00000185219.11	ZNF445	0.925114	0.0237555
Adipose_Subcutaneous	6_53337112_C_T_b37	ENSG00000249379.1	RP1-27K12.4	1	ENSG00000008196.8	TFAP2B	1	0.0839874
Adipose_Subcutaneous	19_49573314_T_C_b37	ENSG00000104872.6	PIH1D1	1	ENSG00000197620.6	CXorf40A	0.702191	0.000931077
Adipose_Subcutaneous	8_66494721_AAGAAGG_A_b37	ENSG00000066855.11	MTFR1	0.981446	ENSG00000136504.7	KAT7	0.818294	0.00432969
Adipose_Subcutaneous	15_85060599_T_A_b37	ENSG00000188388.9	GOLGA6L3	0.148686	ENSG00000230383.1		0.307128	0.0771133
Adipose_Subcutaneous	12_110901953_G_C_b37	ENSG00000196510.8	ANAPC7	0.995944	ENSG00000254420.1	RP11-452H21.1	1	0.000557967
Adipose_Subcutaneous	13_99102055_TG_T_b37	ENSG00000102572.10	STK24	0.962059	ENSG00000056972.14	TRAF3IP2	0.872089	0.0531758
Adipose_Subcutaneous	13_103025754_T_A_b37	ENSG00000272143.1	FGF14-AS2	1	ENSG00000157884.6	CIB4	1	0.00237957
Adipose_Subcutaneous	11_118879824_T_C_b37	ENSG00000118181.6	RPS25	0.84154	ENSG00000185641.5	CTD-2287O16.1	0.425762	0
Adipose_Subcutaneous	7_66787661_C_T_b37	ENSG00000235475.1	LINC01372;RP11-166O4.5	0.882022	ENSG00000161798.6	AQP5	1	0.0803104
Adipose_Subcutaneous	13_112000230_A_G_b37	ENSG00000232814.2	COL4A2-AS1	1	ENSG00000225028.1	RP11-330M19.1	1	0.050972
Adipose_Subcutaneous	2_166714095_G_A_b37	ENSG00000115339.9	GALNT3	1	ENSG00000181847.7	TIGIT	0.993726	0.032333
Adipose_Visceral_Omentum	3_39448804_G_A_b37	ENSG00000168028.9	RPSA	0.787579	ENSG00000183298.4	RPSAP19	0.153558	0
Adipose_Visceral_Omentum	19_8390313_A_G_b37	ENSG00000233927.4	RPS28	0.949371	ENSG00000237039.1	AC018738.2	0.285539	3.4639e-14
Adipose_Visceral_Omentum	10_51565606_G_A_b37	ENSG00000225784.5	RP11-592B15.4	0.460607	ENSG00000188234.9	AGAP4	0.111497	0.0887266
Adipose_Visceral_Omentum	16_89623990_C_CCACA_b37	ENSG00000167526.9	RPL13	0.888324	ENSG00000215030.4	RPL13P12	0.743772	0
Adipose_Visceral_Omentum	16_2014031_C_G_b37	ENSG00000140988.11	RPS2	0.67028	ENSG00000240342.2	RPS2P5	0.15602	0
Adipose_Visceral_Omentum	17_18540292_T_C_b37	ENSG00000171916.12	LGALS9C	0.429976	ENSG00000188933.10	USP32P1	0.359227	0.00692577
Adipose_Visceral_Omentum	5_177292074_G_A_b37	ENSG00000170089.11	RP11-423H2.1	0.566867	ENSG00000051596.5	THOC3	0.506533	0.00819493
Adipose_Visceral_Omentum	16_2014031_C_G_b37	ENSG00000140988.11	RPS2	0.67028	ENSG00000189343.6	RPS2P46	0.252698	0
Adipose_Visceral_Omentum	7_128318168_A_G_b37	ENSG00000229413.1	AC018638.1	0.163782	ENSG00000234419.1	CICP13	0.21686	0.0715279
Adipose_Visceral_Omentum	7_128318168_A_G_b37	ENSG00000242588.2	RP11-274B21.1	0.265695	ENSG00000234419.1	CICP13	0.21686	0.000179923
Adipose_Visceral_Omentum	7_128318168_A_G_b37	ENSG00000243679.1	RP11-274B21.3	0.345899	ENSG00000234419.1	CICP13	0.21686	0.0277198
Adipose_Visceral_Omentum	7_128318168_A_G_b37	ENSG00000243302.3	RP11-274B21.2	0.160049	ENSG00000234419.1	CICP13	0.21686	0.00334741
Adipose_Visceral_Omentum	7_128318168_A_G_b37	ENSG00000230715.2	RP11-274B21.4	0.292784	ENSG00000234419.1	CICP13	0.21686	2.79767e-05
Adipose_Visceral_Omentum	14_36267078_C_CT_b37	ENSG00000174373.11	RALGAPA1	0.736465	ENSG00000229419.1	RALGAPA1P	0.721176	0
Adipose_Visceral_Omentum	5_79950389_GC_G_b37	ENSG00000228716.2	DHFR	0.516943	ENSG00000188985.5	DHFRP1	0.554804	0
Adipose_Visceral_Omentum	6_26660488_G_C_b37	ENSG00000181315.6	ZNF322	0.526872	ENSG00000188801.8	ZNF322P1	0.514348	0.000184032
Adipose_Visceral_Omentum	6_26652703_A_G_b37	ENSG00000233631.2	RP11-457M11.2	0.503836	ENSG00000188801.8	ZNF322P1	0.514348	0.0112801
Adipose_Visceral_Omentum	17_44852612_A_C_b37	ENSG00000120071.8	KANSL1	0.979025	ENSG00000265218.1		0.303974	0.00430668
Adipose_Visceral_Omentum	1_33124590_ATATT_A_b37	ENSG00000162520.10	SYNC	0.876376	ENSG00000172799.5	ZBTB8OSP2	0.895349	0.0559477
Adipose_Visceral_Omentum	6_33239869_C_T_b37	ENSG00000231500.2	RPS18	0.870495	ENSG00000242299.1		0.523809	1.29563e-12
Adipose_Visceral_Omentum	6_153320960_T_C_b37	ENSG00000112031.11	MTRF1L	0.545717	ENSG00000180015.11	RP11-756P10.3	0.666511	3.16303e-12
Adipose_Visceral_Omentum	3_39448804_G_A_b37	ENSG00000168028.9	RPSA	0.787579	ENSG00000237506.2	RPSAP15	0.210452	0
Adipose_Visceral_Omentum	16_16352678_C_T_b37	ENSG00000227827.3	RP11-958N24.2	0.279822	ENSG00000254681.2	PKD1P5	0.280036	2.03218e-05
Adipose_Visceral_Omentum	6_33546837_T_C_b37	ENSG00000030110.8	BAK1	0.515117	ENSG00000175730.7	BAK1P1	0.62236	0.0241709
Adipose_Visceral_Omentum	10_88915107_A_G_b37	ENSG00000122376.7	FAM35A	0.460229	ENSG00000165874.8	FAM35BP	0.3264	0.00222297
Adipose_Visceral_Omentum	5_69373667_A_G_b37	ENSG00000145736.10	GTF2H2	0.319057	ENSG00000230847.4	RP11-195E2.1	0.5	2.97499e-08
Adipose_Visceral_Omentum	7_128318168_A_G_b37	ENSG00000229413.1	AC018638.1	0.163782	ENSG00000233771.2	CICP5	0.159844	0.0134012
Adipose_Visceral_Omentum	7_128318168_A_G_b37	ENSG00000242588.2	RP11-274B21.1	0.265695	ENSG00000233771.2	CICP5	0.159844	6.0352e-05
Adipose_Visceral_Omentum	7_128318168_A_G_b37	ENSG00000243679.1	RP11-274B21.3	0.345899	ENSG00000233771.2	CICP5	0.159844	0.078686
Adipose_Visceral_Omentum	7_128318168_A_G_b37	ENSG00000243302.3	RP11-274B21.2	0.160049	ENSG00000233771.2	CICP5	0.159844	0.0129053
Adipose_Visceral_Omentum	7_128318168_A_G_b37	ENSG00000230715.2	RP11-274B21.4	0.292784	ENSG00000233771.2	CICP5	0.159844	0.0265401
Adipose_Visceral_Omentum	16_16352678_C_T_b37	ENSG00000227827.3	RP11-958N24.2	0.279822	ENSG00000214940.4	NPIPA8	0.167763	2.22045e-16
Adipose_Visceral_Omentum	7_128318168_A_G_b37	ENSG00000242588.2	RP11-274B21.1	0.265695	ENSG00000233003.3	CICP26	0.146907	0.00314702
Adipose_Visceral_Omentum	7_128318168_A_G_b37	ENSG00000243679.1	RP11-274B21.3	0.345899	ENSG00000233003.3	CICP26	0.146907	0.0461733
Adipose_Visceral_Omentum	7_128318168_A_G_b37	ENSG00000243302.3	RP11-274B21.2	0.160049	ENSG00000233003.3	CICP26	0.146907	0.0077709
Adipose_Visceral_Omentum	7_128318168_A_G_b37	ENSG00000230715.2	RP11-274B21.4	0.292784	ENSG00000233003.3	CICP26	0.146907	0.00276728
Adipose_Visceral_Omentum	13_113188237_G_A_b37	ENSG00000126216.8	TUBGCP3	0.953731	ENSG00000225760.1	LINC00431	0.735075	0.0824834
Adipose_Visceral_Omentum	16_16352678_C_T_b37	ENSG00000227827.3	RP11-958N24.2	0.279822	ENSG00000205746.5		0.185107	8.86144e-09
Adipose_Visceral_Omentum	15_85156574_C_T_b37	ENSG00000189136.4	UBE2Q2P1	0.629364	ENSG00000259243.1	RP13-996F3.4	0.091176	0.0438717
Adipose_Visceral_Omentum	17_18265264_G_A_b37	ENSG00000154874.10	CCDC144B	0.353022	ENSG00000188933.10	USP32P1	0.359227	1.35248e-10
Adipose_Visceral_Omentum	9_44009181_A_T_b37	ENSG00000269788.1	RP11-399F4.2	0.201943	ENSG00000235310.1	GXYLT1P6	0.316292	0
Adipose_Visceral_Omentum	9_44009181_A_T_b37	ENSG00000269788.1	RP11-399F4.2	0.201943	ENSG00000235832.2	CNN2P3	0.195052	0
Adipose_Visceral_Omentum	16_16308675_C_T_b37	ENSG00000244257.4	PKD1P1	0.186338	ENSG00000214940.4	NPIPA8	0.167763	0.0121043
Adipose_Visceral_Omentum	16_16308675_C_T_b37	ENSG00000183889.8	AC138969.4	0.146547	ENSG00000214940.4	NPIPA8	0.167763	0.000222003
Adipose_Visceral_Omentum	5_69370574_C_G_b37	ENSG00000250918.2	RP11-497H16.4	0.0892776	ENSG00000230847.4	RP11-195E2.1	0.5	0.00373306
Adipose_Visceral_Omentum	9_44116517_C_CTTTG_b37	ENSG00000236816.2	ANKRD20A7P	0.281782	ENSG00000237869.2		0.404965	1.71746e-08
Adipose_Visceral_Omentum	6_32191041_G_A_b37	ENSG00000204301.5	NOTCH4	0.981685	ENSG00000253570.1	RNF5P1	0.803648	0.0182966
Adipose_Visceral_Omentum	9_130201390_C_CAAAAAAAAAGA_b37	ENSG00000197958.8	RPL12	0.905365	ENSG00000204196.4	RPL12P16	0.192137	0
Adipose_Visceral_Omentum	12_21615917_C_CAG_b37	ENSG00000121350.11	PYROXD1	0.625754	ENSG00000213252.3	RP11-819M15.1	0.810877	0
Adipose_Visceral_Omentum	9_44178013_C_A_b37	ENSG00000170165.5	CR848007.2	0.201408	ENSG00000237869.2		0.404965	0.000152096
Adipose_Visceral_Omentum	11_8015519_AAAG_A_b37	ENSG00000175390.8	EIF3F	0.908951	ENSG00000233426.2	EIF3FP3	0.718878	4.0834e-13
Adipose_Visceral_Omentum	9_68836205_C_T_b37	ENSG00000196774.3	ANKRD20A1	0.163338	ENSG00000183148.5	ANKRD20A2	0.165214	2.78882e-05
Adipose_Visceral_Omentum	12_56435929_C_G_b37	ENSG00000197728.5	RPS26	0.83037	ENSG00000243403.1		0.0799071	0.0755061
Adipose_Visceral_Omentum	12_56435929_C_G_b37	ENSG00000197728.5	RPS26	0.83037	ENSG00000225071.1		0.0823267	0.058563
Adipose_Visceral_Omentum	15_31058693_C_T_b37	ENSG00000166664.9	CHRFAM7A	0.419253	ENSG00000175344.12	CHRNA7	0.52755	0
Adipose_Visceral_Omentum	22_23657875_A_C_b37	ENSG00000186716.15	BCR	0.652615	ENSG00000169668.7	BCRP2	0.224547	0.00131556
Adipose_Visceral_Omentum	15_32173245_T_C_b37	ENSG00000261064.1	RP11-1000B6.3	0.321975	ENSG00000269930.1	RP11-932O9.9	0.119838	0.0886653
Adipose_Visceral_Omentum	5_70676790_T_C_b37	ENSG00000226259.6	GTF2H2B	0.336043	ENSG00000197822.6	OCLN	0.46568	0.000204651
Adipose_Visceral_Omentum	5_70676790_T_C_b37	ENSG00000230847.4	RP11-195E2.1	0.5	ENSG00000197822.6	OCLN	0.46568	0
Adipose_Visceral_Omentum	8_8310508_G_C_b37	ENSG00000173295.3	FAM86B3P	0.726422	ENSG00000269918.1	AF131215.9	0.965434	0.0943827
Adipose_Visceral_Omentum	17_44866805_G_A_b37	ENSG00000228696.4	ARL17B	0.287935	ENSG00000265218.1		0.303974	0.000178454
Adipose_Visceral_Omentum	1_226266029_A_G_b37	ENSG00000163041.5	H3F3A	0.803323	ENSG00000235655.2	H3F3AP4	0.276503	2.22045e-16
Adipose_Visceral_Omentum	5_74048150_C_A_b37	ENSG00000164346.5	NSA2	0.777344	ENSG00000238251.2		0.67803	0.0425912
Adipose_Visceral_Omentum	11_17067930_G_A_b37	ENSG00000110700.2	RPS13	0.955432	ENSG00000228929.1	RP11-159C21.4;RPS13P2	0.879703	1.03857e-08
Adipose_Visceral_Omentum	12_7255640_C_T_b37	ENSG00000205885.3	C1RL-AS1	0.992673	ENSG00000072041.12	SLC6A15	0.99952	0.0113682
Adipose_Visceral_Omentum	9_94791735_C_T_b37	ENSG00000090054.9	SPTLC1	0.825523	ENSG00000262429.1	RP5-1050D4.3	1	0.0969895
Adipose_Visceral_Omentum	14_61188322_C_A_b37	ENSG00000139970.12	RTN1	1	ENSG00000234688.1	RP1-293L6.1	1	0.00170546
Adipose_Visceral_Omentum	3_99161528_A_T_b37	ENSG00000168386.14	FILIP1L	0.975472	ENSG00000260621.1	RP11-413H22.2	1	0.0494981
Adipose_Visceral_Omentum	6_71057821_G_A_b37	ENSG00000168216.6	LMBRD1	1	ENSG00000068654.11	POLR1A	0.936276	0.000422897
Adipose_Visceral_Omentum	3_137834506_A_T_b37	ENSG00000158163.10	DZIP1L	0.99504	ENSG00000152672.3	CLEC4F	1	0.0487176
Adipose_Visceral_Omentum	4_106942261_C_G_b37	ENSG00000145348.12	TBCK	0.92769	ENSG00000230495.1	RP11-462D18.2	1	0.0575696
Adipose_Visceral_Omentum	5_124372447_C_T_b37	ENSG00000250411.1	RP11-257I8.2	1	ENSG00000197768.6	C9orf173	1	0.0163886
Adipose_Visceral_Omentum	1_247360368_T_C_b37	ENSG00000227671.3	MIR3916	0.995589	ENSG00000230563.2	RP5-828H9.1	0.705798	0.0224443
Adipose_Visceral_Omentum	4_1709462_G_A_b37	ENSG00000068078.13	FGFR3	0.996677	ENSG00000228519.3		0.715539	0.0938824
Adipose_Visceral_Omentum	10_45707881_G_A_b37	ENSG00000165406.11	2016-03-08	0.994303	ENSG00000204169.6	AGAP7	0.106438	0.06752
Adipose_Visceral_Omentum	20_62152519_C_G_b37	ENSG00000125534.5	PPDPF	0.995857	ENSG00000103061.7	SLC7A6OS	0.999237	0.0156511
Adipose_Visceral_Omentum	12_8831954_T_A_b37	ENSG00000256661.1	A2ML1-AS1	1	ENSG00000257000.1	RP13-820C6.2	1	0.00934417
Adipose_Visceral_Omentum	12_8831954_T_A_b37	ENSG00000166532.11	RIMKLB	0.958425	ENSG00000257000.1	RP13-820C6.2	1	0.0685274
Adipose_Visceral_Omentum	2_178002644_A_G_b37	ENSG00000236501.1	AC079305.11	1	ENSG00000175879.7	HOXD8	1	9.7633e-13
Adipose_Visceral_Omentum	6_31938451_T_C_b37	ENSG00000248290.1	TNXA	0.5	ENSG00000253570.1	RNF5P1	0.803648	0.082278
Adipose_Visceral_Omentum	16_16352678_C_T_b37	ENSG00000227827.3	RP11-958N24.2	0.279822	ENSG00000260447.1	RP11-304L19.2	0.278706	3.62037e-05
Adipose_Visceral_Omentum	12_30960613_AAGTC_A_b37	ENSG00000235884.2	LINC00941	0.945281	ENSG00000249267.2	LINC00939	0.931523	0.00844494
Adipose_Visceral_Omentum	10_48318619_C_T_b37	ENSG00000198035.9	AGAP9	0.129192	ENSG00000254929.2	RP11-144G6.12	0.201819	1.17706e-12
Adipose_Visceral_Omentum	19_990645_G_A_b37	ENSG00000065268.6	WDR18	1	ENSG00000268030.1	AC005253.2	0.961556	0.000966675
Adipose_Visceral_Omentum	6_35759904_T_C_b37	ENSG00000065029.10	ZNF76	1	ENSG00000109099.9	PMP22	0.998284	0.0594932
Adipose_Visceral_Omentum	21_42524842_C_G_b37	ENSG00000226496.1	LINC00323	1	ENSG00000108774.10	RAB5C	0.922125	0.0446642
Adipose_Visceral_Omentum	10_48573416_C_T_b37	ENSG00000227781.4	GLUD1P2	0.239311	ENSG00000213412.3	HNRNPA1P33	0.565346	0.0597318
Adipose_Visceral_Omentum	7_44836314_A_G_b37	ENSG00000196262.9	PPIA	0.808523	ENSG00000198618.4	PPIAP22	0.233783	0
Adipose_Visceral_Omentum	2_242711227_G_T_b37	ENSG00000215692.2	AC114730.8	1	ENSG00000228302.2	RP11-186N15.3	0.963649	0.000756221
Adipose_Visceral_Omentum	12_70243369_C_A_b37	ENSG00000127328.17	RAB3IP	0.931322	ENSG00000178307.5	TMEM11	0.98732	0.0935068
Adipose_Visceral_Omentum	19_3191604_A_G_b37	ENSG00000125912.6	NCLN	0.999609	ENSG00000158773.10	USF1	0.96889	0.0458362
Adipose_Visceral_Omentum	19_2772380_G_C_b37	ENSG00000267469.1	AC005944.2	1	ENSG00000127334.10	DYRK2	1	0.012004
Adipose_Visceral_Omentum	12_4743072_A_C_b37	ENSG00000111254.3	AKAP3	1	ENSG00000086696.6	HSD17B2	1	0.0861151
Adipose_Visceral_Omentum	1_171132258_G_A_b37	ENSG00000094963.9	FMO2	0.969247	ENSG00000034063.9	UHRF1	0.760462	0.0644871
Adipose_Visceral_Omentum	16_16291816_G_C_b37	ENSG00000103226.13	NOMO3	0.347829	ENSG00000214940.4	NPIPA8	0.167763	0.044043
Adipose_Visceral_Omentum	5_1632684_T_C_b37	ENSG00000185986.10	SDHAP3	0.723683	ENSG00000046889.14	PREX2	0.980415	0.0596322
Adipose_Visceral_Omentum	2_178002644_A_G_b37	ENSG00000236501.1	AC079305.11	1	ENSG00000128709.10	HOXD9	1	0
Adipose_Visceral_Omentum	10_38168760_A_G_b37	ENSG00000175395.11	ZNF25	0.995978	ENSG00000157087.12	ATP2B2	0.998713	0.0400982
Adipose_Visceral_Omentum	2_242755965_C_T_b37	ENSG00000204099.7	NEU4	0.987976	ENSG00000174903.10	RAB1B	0.728575	0.0385111
Adipose_Visceral_Omentum	7_128215544_G_GCTA_b37	ENSG00000271529.1	CICP14	0.138156	ENSG00000234419.1	CICP13	0.21686	0
Adipose_Visceral_Omentum	3_195338127_A_G_b37	ENSG00000224769.1	AC069213.1;MUC20P1	0.531011	ENSG00000236833.1	AC024560.2	0.488662	7.77156e-15
Adipose_Visceral_Omentum	1_121097264_T_C_b37	ENSG00000171943.7	SRGAP2C	0.495825	ENSG00000261216.1	RP11-166B2.5	0.886124	0.0164418
Adipose_Visceral_Omentum	15_43624189_C_T_b37	ENSG00000168803.10	ADAL	0.951253	ENSG00000144191.7	CNGA3	0.998833	0.0218666
Adipose_Visceral_Omentum	9_37909522_T_G_b37	ENSG00000213839.4	RP11-3J10.4;TMX2P1	0.876183	ENSG00000272010.1	CTD-3025N20.3	1	0.0694268
Adipose_Visceral_Omentum	20_33880546_G_A_b37	ENSG00000126005.11	MMP24-AS1	0.999075	ENSG00000110046.8	ATG2A	0.961707	0.0117377
Adipose_Visceral_Omentum	15_30975186_TAGC_T_b37	ENSG00000263070.1	RP11-382B18.3	0.231538	ENSG00000175344.12	CHRNA7	0.52755	2.63108e-08
Adipose_Visceral_Omentum	9_44009181_A_T_b37	ENSG00000269788.1	RP11-399F4.2	0.201943	ENSG00000227376.1	FTH1P16	0.433655	0.035884
Adipose_Visceral_Omentum	19_33072085_A_G_b37	ENSG00000105185.7	PDCD5	0.953889	ENSG00000248932.1		0.977698	0.0462336
Adipose_Visceral_Omentum	17_39685860_T_A_b37	ENSG00000229732.1	AC019349.5	1	ENSG00000166535.15	A2ML1	0.921558	0
Adipose_Visceral_Omentum	7_95078296_A_G_b37	ENSG00000105854.8	PON2	1	ENSG00000112234.4	FBXL4	0.955593	9.05013e-05
Adipose_Visceral_Omentum	9_130201390_C_CAAAAAAAAAGA_b37	ENSG00000197958.8	RPL12	0.905365	ENSG00000185834.9	RPL12P4	0.310301	0
Adipose_Visceral_Omentum	3_195317047_G_A_b37	ENSG00000242086.4	LINC00969	0.701143	ENSG00000236833.1	AC024560.2	0.488662	5.23729e-09
Adipose_Visceral_Omentum	15_31649888_C_T_b37	ENSG00000186399.8	GOLGA8R	0.174716	ENSG00000253875.1	RP11-16P20.3	1	0.0227993
Adipose_Visceral_Omentum	16_89269068_C_G_b37	ENSG00000259803.2	SLC22A31	1	ENSG00000100288.15	CHKB	1	0.025995
Adipose_Visceral_Omentum	17_44852612_A_C_b37	ENSG00000120071.8	KANSL1	0.979025	ENSG00000266918.1	RP11-798G7.8	0.210367	1.38021e-06
Adipose_Visceral_Omentum	3_132235344_A_T_b37	ENSG00000138246.11	DNAJC13	0.998692	ENSG00000068097.10	HEATR6	0.99934	0.0491452
Adipose_Visceral_Omentum	15_43586908_C_A_b37	ENSG00000140265.8	ZSCAN29	0.937599	ENSG00000176845.8	METRNL	1	0.0607623
Adipose_Visceral_Omentum	15_31735715_G_T_b37	ENSG00000247728.2	RP11-932O9.7	0.425274	ENSG00000186399.8	GOLGA8R	0.174716	2.50657e-07
Adipose_Visceral_Omentum	19_51300139_C_T_b37	ENSG00000167747.9	C19orf48	0.977796	ENSG00000117707.11	PROX1	0.995568	0.00423485
Adipose_Visceral_Omentum	4_189377071_C_T_b37	ENSG00000249378.1	LINC01060	1	ENSG00000197329.7	PELI1	1	0.0276869
Adipose_Visceral_Omentum	8_67378573_A_G_b37	ENSG00000147576.11	ADHFE1	1	ENSG00000176115.8	AQP7P4	0.24776	0.0809062
Adipose_Visceral_Omentum	3_112709033_T_C_b37	ENSG00000163607.10	GTPBP8	0.941251	ENSG00000167536.9	DHRS13	1	0.0440614
Adipose_Visceral_Omentum	6_46684222_C_T_b37	ENSG00000153291.11	SLC25A27	0.995623	ENSG00000227232.4	WASH7P	0.184839	0.0245048
Adipose_Visceral_Omentum	5_70568209_G_A_b37	ENSG00000254353.1	RP11-195E2.4	0.375074	ENSG00000197822.6	OCLN	0.46568	5.74054e-07
Adipose_Visceral_Omentum	10_96743108_T_C_b37	ENSG00000173124.10	ACSM6;C10orf129	0.950754	ENSG00000176728.3	TTTY14	0.997466	0.029656
Adipose_Visceral_Omentum	10_48318619_C_T_b37	ENSG00000198035.9	AGAP9	0.129192	ENSG00000204172.7	AGAP10;AGAP9	0.145546	1.0858e-13
Adipose_Visceral_Omentum	5_150575467_C_A_b37	ENSG00000198624.8	CCDC69	0.938962	ENSG00000101230.5	ISM1	1	0.00269313
Adipose_Visceral_Omentum	12_14966604_C_T_b37	ENSG00000182993.3	C12orf60	0.97071	ENSG00000066468.16	FGFR2	0.959269	0.000262065
Adipose_Visceral_Omentum	20_31916073_T_C_b37	ENSG00000125970.7	RALY	1	ENSG00000260859.1	RP11-254F19.2	1	0.0215613
Adipose_Visceral_Omentum	1_53268010_CTCTTTT_C_b37	ENSG00000228929.1	RP11-159C21.4;RPS13P2	0.879703	ENSG00000110700.2	RPS13	0.955432	1.15108e-12
Adipose_Visceral_Omentum	1_11726934_G_C_b37	ENSG00000116661.9	FBXO2	0.996029	ENSG00000197747.4	S100A10	1	0.00320329
Adipose_Visceral_Omentum	6_110744762_C_T_b37	ENSG00000203797.5	DDO	0.988849	ENSG00000170832.8	USP32	0.8145	0.0347118
Adipose_Visceral_Omentum	18_33658758_A_AATT_b37	ENSG00000141425.13	RPRD1A	0.96847	ENSG00000273076.1	RP3-508I15.22	1	0.00042309
Adipose_Visceral_Omentum	5_76135153_C_T_b37	ENSG00000164251.4	F2RL1	0.882487	ENSG00000115598.5	IL1RL2	0.987231	0.056701
Adipose_Visceral_Omentum	6_29637365_G_A_b37	ENSG00000214922.5	HLA-F-AS1	0.989213	ENSG00000226278.1	PSPHP1	0.553097	0.0110483
Adipose_Visceral_Omentum	5_43410617_G_A_b37	ENSG00000112964.9	GHR	0.955883	ENSG00000189180.11	ZNF33A	0.809159	0.0349538
Adipose_Visceral_Omentum	22_50053871_G_A_b37	ENSG00000188511.8	C22orf34	0.972788	ENSG00000231742.1	LINC01273;RP11-112L6.4	1	0.0565363
Adipose_Visceral_Omentum	12_48451339_ATATAT_A_b37	ENSG00000240399.1	RP1-228P16.1	1	ENSG00000265287.2	RP11-192H23.6	1	0.0334175
Adipose_Visceral_Omentum	16_2245973_GT_G_b37	ENSG00000182685.3	BRICD5	0.908381	ENSG00000198854.4	C1orf68	1	0.0152599
Adipose_Visceral_Omentum	8_58136389_C_G_b37	ENSG00000253301.1	LINC01606;RP11-513O17.2	0.966788	ENSG00000205981.2	DNAJC19	0.946588	0.0285692
Adipose_Visceral_Omentum	22_50251742_C_G_b37	ENSG00000182858.9	ALG12	0.839927	ENSG00000263975.1	CTB-58E17.9	1	0.000992997
Adipose_Visceral_Omentum	17_39685860_T_A_b37	ENSG00000229732.1	AC019349.5	1	ENSG00000169474.3	SPRR1A	0.930004	0
Adipose_Visceral_Omentum	1_107619244_T_C_b37	ENSG00000198890.6	PRMT6	0.999241	ENSG00000103647.8	CORO2B	1	0.00165196
Adipose_Visceral_Omentum	12_11120667_G_A_b37	ENSG00000111215.7	PRR4	0.936272	ENSG00000138398.11	PPIG	0.995286	0.000139064
Adipose_Visceral_Omentum	21_27099046_A_G_b37	ENSG00000154723.8	ATP5J	0.97354	ENSG00000116459.6	ATP5F1	0.838337	2.48573e-05
Adipose_Visceral_Omentum	1_201430722_A_C_b37	ENSG00000224818.1	RP11-134G8.8	1	ENSG00000265069.1	RP11-781P6.1	1	0.0115028
Adipose_Visceral_Omentum	9_44009181_A_T_b37	ENSG00000269788.1	RP11-399F4.2	0.201943	ENSG00000226564.1	FTH1P20	0.489723	0.042634
Adipose_Visceral_Omentum	1_52883690_T_TC_b37	ENSG00000134744.9	ZCCHC11	0.962348	ENSG00000164548.6	TRA2A	0.972276	0.00978651
Adipose_Visceral_Omentum	16_8949455_T_A_b37	ENSG00000259939.1	RP11-77H9.5	1	ENSG00000270903.1	HNRNPA3P9	1	0.00633655
Adipose_Visceral_Omentum	9_100650737_G_C_b37	ENSG00000136932.9	C9orf156	0.998647	ENSG00000160124.5	CCDC58	0.854656	0.0190533
Adipose_Visceral_Omentum	12_10883516_T_C_b37	ENSG00000212126.3	TAS2R50	0.977635	ENSG00000214700.5	C12orf71	0.889684	0.0264532
Adipose_Visceral_Omentum	1_168513320_A_G_b37	ENSG00000229757.2	RP4-738P11.4	0.758766	ENSG00000267703.1	CTD-2013N17.4	1	0.0109083
Adipose_Visceral_Omentum	2_79201918_A_T_b37	ENSG00000115386.5	REG1A	0.982798	ENSG00000170835.10	CEL	0.733245	0
Adipose_Visceral_Omentum	5_70701185_A_C_b37	ENSG00000249437.3	NAIP	0.345698	ENSG00000179978.10	RP11-1319K7.1	0.355887	0
Adipose_Visceral_Omentum	18_43689743_G_A_b37	ENSG00000152240.8	HAUS1	0.725063	ENSG00000163624.5	CDS1	1	0.00509645
Adipose_Visceral_Omentum	2_242607483_G_T_b37	ENSG00000228989.1	AC133528.2	0.792294	ENSG00000269999.1	CTD-3185P2.2	1	0.0610875
Adipose_Visceral_Omentum	7_143111112_C_G_b37	ENSG00000229153.1	EPHA1-AS1	0.786413	ENSG00000227018.1	IL6STP1	0.87315	0.0605627
Adipose_Visceral_Omentum	14_92287743_G_C_b37	ENSG00000165929.8	TC2N	0.995364	ENSG00000196756.7	SNHG17	1	0.00533659
Adipose_Visceral_Omentum	16_30337486_GAGCC_G_b37	ENSG00000198064.9	RP11-347C12.1	0.0680876	ENSG00000234719.4	RP11-166B2.1	0.29016	0.000502298
Adipose_Visceral_Omentum	4_85235294_T_C_b37	ENSG00000163624.5	CDS1	1	ENSG00000099250.13	NRP1	0.961143	0.000611455
Adipose_Visceral_Omentum	9_370199_A_G_b37	ENSG00000107099.11	DOCK8	0.90248	ENSG00000232606.1	AC010090.1;LINC01412	1	0.040417
Adipose_Visceral_Omentum	1_52883690_T_TC_b37	ENSG00000134744.9	ZCCHC11	0.962348	ENSG00000137714.2	FDX1	0.83358	0.0265879
Adipose_Visceral_Omentum	22_50010570_T_C_b37	ENSG00000235111.1	RP1-29C18.8	1	ENSG00000137878.12	GCOM1	0.904041	0.0165653
Adipose_Visceral_Omentum	3_158411681_C_T_b37	ENSG00000168827.10	GFM1	0.96868	ENSG00000137947.7	GTF2B	1	0.0166646
Adipose_Visceral_Omentum	17_58226800_C_T_b37	ENSG00000068097.10	HEATR6	0.99934	ENSG00000009724.12	MASP2	0.998959	0.0960365
Adipose_Visceral_Omentum	6_160224346_T_C_b37	ENSG00000146457.10	WTAP	0.894406	ENSG00000197021.4	CXorf40B	0.671198	0.0926793
Adipose_Visceral_Omentum	16_4867124_C_G_b37	ENSG00000267077.1	RP11-127I20.5	0.955228	ENSG00000175707.7	C1orf172;KDF1	1	0.0410962
Adipose_Visceral_Omentum	6_52785846_C_T_b37	ENSG00000137269.10	LRRC1	0.97705	ENSG00000198625.8	MDM4	0.851049	5.21543e-05
Adipose_Visceral_Omentum	1_16530049_C_T_b37	ENSG00000142632.12	ARHGEF19	1	ENSG00000163909.6	HEYL	0.999521	0.0173776
Adipose_Visceral_Omentum	11_100465416_T_C_b37	ENSG00000170647.2	TMEM133	0.999684	ENSG00000128923.6	FAM63B	0.872326	0.00852167
Adipose_Visceral_Omentum	5_140759617_C_A_b37	ENSG00000253731.1	PCDHGA6	0.947218	ENSG00000229473.2	RGS17P1	0.955115	0.0857826
Adipose_Visceral_Omentum	16_81118612_A_G_b37	ENSG00000140905.5	GCSH	0.601895	ENSG00000224837.1	GCSHP5	0.565588	0
Adipose_Visceral_Omentum	17_61817124_G_GTATATATGTACATATAT_b37	ENSG00000108592.12	FTSJ3	0.99983	ENSG00000071626.12	DAZAP1	0.997256	0.00951521
Adipose_Visceral_Omentum	7_150020381_G_A_b37	ENSG00000127399.10	LRRC61	1	ENSG00000154262.8	ABCA6	0.995273	0.0707263
Adipose_Visceral_Omentum	17_5517520_G_A_b37	ENSG00000108559.7	NUP88	0.962323	ENSG00000135624.11	CCT7	0.962808	0.000363095
Adipose_Visceral_Omentum	11_107138482_A_G_b37	ENSG00000261098.1	RP11-819C21.1	0.945023	ENSG00000258751.1		1	0.000801476
Adipose_Visceral_Omentum	1_19180044_G_A_b37	ENSG00000226396.1	RPS14P3	0.845582	ENSG00000152454.3	ZNF256	0.948523	0.0266319
Adipose_Visceral_Omentum	2_69472476_G_A_b37	ENSG00000198380.8	GFPT1	0.901079	ENSG00000133895.10	MEN1	0.981226	0.0343025
Adipose_Visceral_Omentum	15_83667973_C_G_b37	ENSG00000169612.3	FAM103A1	0.628793	ENSG00000235272.1	FAM103A2P	0.617262	3.29805e-05
Adipose_Visceral_Omentum	17_44852612_A_C_b37	ENSG00000120071.8	KANSL1	0.979025	ENSG00000138074.10	SLC5A6	0.992582	0.0565505
Adipose_Visceral_Omentum	5_68856052_G_A_b37	ENSG00000205571.8	SMN2	0.479817	ENSG00000132196.9	HSD17B7	0.552433	0.017481
Adipose_Visceral_Omentum	20_58173606_C_T_b37	ENSG00000087495.12	PHACTR3	0.998319	ENSG00000271725.1	RP11-761I4.4	1	0.0604949
Adipose_Visceral_Omentum	19_54704233_T_TA_b37	ENSG00000170889.9	RPS9	0.870576	ENSG00000196917.4	HCAR1	0.874728	0.000143835
Adipose_Visceral_Omentum	4_965779_G_A_b37	ENSG00000145214.9	DGKQ	0.999922	ENSG00000143507.13	DUSP10	1	0.0329921
Adipose_Visceral_Omentum	4_106942261_C_G_b37	ENSG00000145348.12	TBCK	0.92769	ENSG00000176697.14	BDNF	0.999542	0.00231832
Adipose_Visceral_Omentum	9_140268976_C_T_b37	ENSG00000187609.11	EXD3	0.941916	ENSG00000158373.7	HIST1H2BD	0.918129	0.00503737
Adipose_Visceral_Omentum	1_84955233_C_T_b37	ENSG00000117133.6	RPF1	0.978373	ENSG00000272040.1	CTC-366B18.4	0.985613	0.0400029
Adipose_Visceral_Omentum	16_28556564_CT_C_b37	ENSG00000178188.10	SH2B1	0.952442	ENSG00000012048.15	BRCA1	0.959122	0.00694527
Adipose_Visceral_Omentum	21_47103216_A_G_b37	ENSG00000183570.12	PCBP3	0.993617	ENSG00000177096.4	FAM109B	1	0.00743143
Adipose_Visceral_Omentum	20_61857923_C_T_b37	ENSG00000101198.10	NKAIN4	0.998376	ENSG00000253813.1	COX6B1P4	1	0.0850202
Adipose_Visceral_Omentum	17_55159028_T_C_b37	ENSG00000263004.1	RP11-166P13.3	0.9397	ENSG00000156466.8	GDF6	0.994413	0.0514986
Adipose_Visceral_Omentum	2_231251562_C_A_b37	ENSG00000185404.12	SP140L	0.731787	ENSG00000124608.4	AARS2	0.896965	0.000201747
Adipose_Visceral_Omentum	12_120908958_G_A_b37	ENSG00000110871.10	COQ5	0.975003	ENSG00000154175.12	ABI3BP	0.996224	0.00497439
Adipose_Visceral_Omentum	7_26397239_C_A_b37	ENSG00000086300.11	SNX10	0.998608	ENSG00000145934.11	TENM2	0.999534	0.0960121
Adipose_Visceral_Omentum	4_6611238_TG_T_b37	ENSG00000013288.4	MAN2B2	0.926278	ENSG00000229588.1		1	0.0564364
Adipose_Visceral_Omentum	16_89883224_C_G_b37	ENSG00000204991.6	SPIRE2	0.8342	ENSG00000185559.9	DLK1	1	0.0287653
Adipose_Visceral_Omentum	9_36189647_T_C_b37	ENSG00000159921.10	GNE	0.864319	ENSG00000119392.10	GLE1	1	0.00407063
Adipose_Visceral_Omentum	6_33456464_T_C_b37	ENSG00000204209.6	DAXX	1	ENSG00000234608.3	MAPKAPK5-AS1	1	0.00767073
Adipose_Visceral_Omentum	17_63105969_C_T_b37	ENSG00000263470.1	RP11-160O5.1	1	ENSG00000177731.11	FLII	0.999766	0.01199
Adipose_Visceral_Omentum	10_18804094_T_C_b37	ENSG00000240291.1	RP11-499P20.2	0.915186	ENSG00000166295.4	ANAPC16	0.826542	0.0745225
Adipose_Visceral_Omentum	1_34138160_G_A_b37	ENSG00000121903.10	ZSCAN20	0.974306	ENSG00000134369.11	NAV1	0.973812	0.0772549
Adipose_Visceral_Omentum	5_133746115_C_T_b37	ENSG00000237190.3	CDKN2AIPNL	0.800888	ENSG00000162980.12	ARL5A	0.880331	0.00993047
Adipose_Visceral_Omentum	21_47941916_G_A_b37	ENSG00000160294.6	MCM3AP	0.991255	ENSG00000157617.12	C2CD2	0.970466	0.0782966
Adipose_Visceral_Omentum	3_159254014_C_T_b37	ENSG00000272087.1	RP11-379F4.7	1	ENSG00000227885.1	RP11-79N23.1	1	0.0039616
Adipose_Visceral_Omentum	11_86088687_T_A_b37	ENSG00000149196.11	C11orf73	0.943716	ENSG00000111596.7	CNOT2	0.977865	0.0845293
Adipose_Visceral_Omentum	17_5517520_G_A_b37	ENSG00000108559.7	NUP88	0.962323	ENSG00000213445.4	SIPA1	0.976344	0.0403544
Adipose_Visceral_Omentum	12_104794272_T_A_b37	ENSG00000136052.5	SLC41A2	0.96923	ENSG00000175352.6	NRIP3	0.932781	0.0134978
Adipose_Visceral_Omentum	3_51703064_A_G_b37	ENSG00000164081.8	TEX264	0.996894	ENSG00000178252.13	WDR6	0.988352	0.0125592
Adipose_Visceral_Omentum	11_43877934_C_A_b37	ENSG00000246250.2	RP11-613D13.5	1	ENSG00000234498.2	RPL13AP20	0.452664	0.0730312
Adipose_Visceral_Omentum	17_20382850_G_T_b37	ENSG00000230528.3	NOS2P3	0.390304	ENSG00000180509.7	KCNE1	0.986225	0.0774576
Adipose_Visceral_Omentum	10_35043405_G_A_b37	ENSG00000148498.11	PARD3	1	ENSG00000273320.1	RP11-22N19.2	1	0.00272962
Adipose_Visceral_Omentum	2_160147145_T_C_b37	ENSG00000196151.6	WDSUB1	0.998985	ENSG00000185633.6	NDUFA4L2	1	0.0923598
Adipose_Visceral_Omentum	19_10258159_C_T_b37	ENSG00000130812.6	ANGPTL6	1	ENSG00000162511.7	LAPTM5	1	0.0559437
Adipose_Visceral_Omentum	3_135695042_C_CTA_b37	ENSG00000073711.6	PPP2R3A	0.979074	ENSG00000145020.10	AMT	0.984699	0.080006
Adipose_Visceral_Omentum	10_111840725_A_G_b37	ENSG00000148700.9	ADD3	0.992285	ENSG00000163347.5	CLDN1	0.982134	0.0286226
Adipose_Visceral_Omentum	15_31807319_G_C_b37	ENSG00000254912.2	RP11-632K20.2	0.469237	ENSG00000215302.4	CTD-3092A11.1	0.438058	6.66134e-16
Adipose_Visceral_Omentum	1_20834610_C_A_b37	ENSG00000090432.5	MUL1	1	ENSG00000157870.10	FAM213B	0.989151	0.0376424
Adipose_Visceral_Omentum	12_109980266_G_A_b37	ENSG00000110906.8	KCTD10	0.982965	ENSG00000232710.1	RP4-669P10.16	0.8	0.0720972
Adipose_Visceral_Omentum	5_180222298_T_C_b37	ENSG00000233937.2	CTC-338M12.4	0.990304	ENSG00000239569.2	KMT2E-AS1	1	5.63828e-05
Adipose_Visceral_Omentum	7_20371273_C_G_b37	ENSG00000271133.1	CTA-293F17.1	1	ENSG00000119820.6	YIPF4	0.804519	0.0800061
Adipose_Visceral_Omentum	17_39685860_T_A_b37	ENSG00000229732.1	AC019349.5	1	ENSG00000163209.10	SPRR3	0.920867	0
Adipose_Visceral_Omentum	13_46683633_C_A_b37	ENSG00000235903.3	CPB2-AS1	0.972807	ENSG00000162402.8	USP24	1	0.0704916
Adipose_Visceral_Omentum	1_200659185_C_T_b37	ENSG00000260088.1	RP11-92G12.3	0.672748	ENSG00000204518.2	AADACL4	1	0.0618889
Adipose_Visceral_Omentum	3_133466457_T_A_b37	ENSG00000091513.10	TF	0.989344	ENSG00000120519.10	SLC10A7	1	0.0739079
Adipose_Visceral_Omentum	13_37333763_T_TC_b37	ENSG00000180440.3	SERTM1	0.991394	ENSG00000205929.5	C21orf62	0.877946	9.32886e-10
Adipose_Visceral_Omentum	11_307999_T_G_b37	ENSG00000185201.12	IFITM2	0.670157	ENSG00000180998.7	GPR137C	0.985612	0.00257475
Adipose_Visceral_Omentum	7_103102601_C_T_b37	ENSG00000170615.10	SLC26A5	0.997145	ENSG00000145996.7	CDKAL1	0.862751	0.0392406
Adipose_Visceral_Omentum	15_85095044_T_TTAA_b37	ENSG00000225151.6	AC103965.1;GOLGA2P7	0.215019	ENSG00000259472.1	RP13-996F3.3	0.175624	0.00312945
Adipose_Visceral_Omentum	1_150651482_A_G_b37	ENSG00000143379.8	SETDB1	0.994656	ENSG00000265334.1		1	0.00868052
Adipose_Visceral_Omentum	2_33746333_C_T_b37	ENSG00000152689.13	RASGRP3	0.946313	ENSG00000147570.5	DNAJC5B	0.948161	0.0108637
Adipose_Visceral_Omentum	2_177984879_A_T_b37	ENSG00000128709.10	HOXD9	1	ENSG00000136960.8	ENPP2	0.992092	4.54823e-06
Adipose_Visceral_Omentum	2_177984879_A_T_b37	ENSG00000175879.7	HOXD8	1	ENSG00000136960.8	ENPP2	0.992092	0.00897897
Adipose_Visceral_Omentum	10_101693256_T_C_b37	ENSG00000107554.11	DNMBP	0.99478	ENSG00000175643.7	RMI2	1	0.0630283
Adipose_Visceral_Omentum	16_11624488_T_A_b37	ENSG00000189067.8	LITAF	0.982929	ENSG00000260088.1	RP11-92G12.3	0.672748	0.0111918
Adipose_Visceral_Omentum	12_11323994_G_A_b37	ENSG00000256537.1	RP11-785H5.1;SMIM10L1	1	ENSG00000114374.8	USP9Y	0.993631	0.0116848
Adipose_Visceral_Omentum	4_89203197_T_C_b37	ENSG00000246375.2	RP11-10L7.1	1	ENSG00000260655.1	CTA-250D10.23	1	0.0488853
Adipose_Visceral_Omentum	19_35418182_G_A_b37	ENSG00000168661.10	ZNF30	0.949872	ENSG00000001461.12	NIPAL3	0.976577	0.0687593
Adipose_Visceral_Omentum	3_48293078_G_A_b37	ENSG00000228638.1	FCF1P2	1	ENSG00000267414.1	RP11-456K23.1	1	0.0279345
Adipose_Visceral_Omentum	10_48305258_A_G_b37	ENSG00000179296.9	CTGLF12P	0.159621	ENSG00000204172.7	AGAP10;AGAP9	0.145546	0.0909682
Adipose_Visceral_Omentum	15_63449543_A_C_b37	ENSG00000103642.7	LACTB	0.932024	ENSG00000042445.9	RETSAT	0.867271	0.078025
Adipose_Visceral_Omentum	2_177984879_A_T_b37	ENSG00000128709.10	HOXD9	1	ENSG00000254287.1	RP11-44K6.4	0.904029	8.22897e-13
Adipose_Visceral_Omentum	2_177984879_A_T_b37	ENSG00000175879.7	HOXD8	1	ENSG00000254287.1	RP11-44K6.4	0.904029	1.86572e-08
Adipose_Visceral_Omentum	12_11138683_C_T_b37	ENSG00000212127.5	TAS2R14	0.995764	ENSG00000070476.10	ZXDC	0.991853	0.00957984
Adipose_Visceral_Omentum	2_128178378_G_A_b37	ENSG00000169967.12	MAP3K2	0.979736	ENSG00000232832.1	LMLN-AS1	1	0.0358933
Adipose_Visceral_Omentum	17_34835526_T_A_b37	ENSG00000005955.8	GGNBP2	0.996073	ENSG00000242114.1	MTFP1	1	0.00281983
Adipose_Visceral_Omentum	1_155067533_G_A_b37	ENSG00000169231.9	THBS3	1	ENSG00000140391.10	TSPAN3	1	0.0110172
Adipose_Visceral_Omentum	16_2014148_ACAACCT_A_b37	ENSG00000255513.1	AC005363.9	0.98556	ENSG00000128050.4	PAICS	0.814969	0.041344
Adipose_Visceral_Omentum	15_76514361_A_G_b37	ENSG00000259422.1	RP11-593F23.1	1	ENSG00000130748.6	TMEM160	1	0.0356447
Adipose_Visceral_Omentum	11_61895741_A_G_b37	ENSG00000167987.6	VPS37C	1	ENSG00000055130.11	CUL1	0.976524	0.0389482
Adipose_Visceral_Omentum	8_99305539_A_T_b37	ENSG00000104361.5	NIPAL2	0.955373	ENSG00000104918.4	RETN	1	0.00224365
Adipose_Visceral_Omentum	3_50064424_G_A_b37	ENSG00000004534.10	RBM6	0.969815	ENSG00000166340.10	TPP1	1	0.000988024
Adipose_Visceral_Omentum	12_27124528_GATTT_G_b37	ENSG00000064115.6	TM7SF3	0.901895	ENSG00000105518.9	TMEM205	0.850764	0.0330027
Adipose_Visceral_Omentum	1_155181843_G_T_b37	ENSG00000160766.10	GBAP1	0.716462	ENSG00000228214.2	LINC00693	1	0.0258867
Adipose_Visceral_Omentum	19_42462788_G_A_b37	ENSG00000105404.6	RABAC1	1	ENSG00000102935.7	ZNF423	0.999924	0.0206589
Adipose_Visceral_Omentum	6_31741659_C_T_b37	ENSG00000227939.1	RPL3P2	0.73822	ENSG00000248923.1	MTND5P11	0.905351	0.0779514
Adipose_Visceral_Omentum	21_47103216_A_G_b37	ENSG00000183570.12	PCBP3	0.993617	ENSG00000005339.8	CREBBP	0.991653	0.0109175
Adipose_Visceral_Omentum	5_68610438_G_C_b37	ENSG00000213830.3	CFL1P5	0.991822	ENSG00000256274.1	TAS2R64P	0.945356	0.0799073
Adipose_Visceral_Omentum	22_19116351_G_A_b37	ENSG00000273032.1	DGCR9	0.996796	ENSG00000171823.6	FBXL14	0.999019	0.0600401
Adipose_Visceral_Omentum	22_19116351_G_A_b37	ENSG00000270393.1	AC000095.9	0.990625	ENSG00000171823.6	FBXL14	0.999019	0.0296695
Adipose_Visceral_Omentum	5_893452_T_A_b37	ENSG00000028310.13	BRD9	0.939	ENSG00000100234.11	TIMP3	1	0.0223148
Adipose_Visceral_Omentum	6_10744717_C_T_b37	ENSG00000272097.1	RP11-421M1.8	1	ENSG00000109929.5	SC5D	0.994947	0.0682005
Adipose_Visceral_Omentum	10_45937992_A_C_b37	ENSG00000188234.9	AGAP4	0.111497	ENSG00000174194.11	AGAP8	0.183724	4.19992e-09
Adipose_Visceral_Omentum	10_21350048_A_C_b37	ENSG00000136770.6	DNAJC1	0.987679	ENSG00000168175.10	MAPK1IP1L	0.884365	0.00277682
Adipose_Visceral_Omentum	20_31916073_T_C_b37	ENSG00000125970.7	RALY	1	ENSG00000188690.8	UROS	1	0.0152313
Adipose_Visceral_Omentum	6_26652703_A_G_b37	ENSG00000233631.2	RP11-457M11.2	0.503836	ENSG00000242375.1	RP11-498P14.3	0.5	0.000305168
Adipose_Visceral_Omentum	18_322109_A_G_b37	ENSG00000264514.1	RP11-720L2.4	1	ENSG00000162441.7	LZIC	0.991347	0.00994895
Adipose_Visceral_Omentum	3_128660937_A_G_b37	ENSG00000177646.13	ACAD9	1	ENSG00000112659.9	CUL9	0.996366	0.0950231
Adipose_Visceral_Omentum	2_24809070_A_G_b37	ENSG00000084676.11	NCOA1	0.973576	ENSG00000016864.12	GLT8D1	0.979748	0.00293343
Adipose_Visceral_Omentum	5_9541866_T_C_b37	ENSG00000250786.1	SNHG18	1	ENSG00000169740.9	ZNF32	1	0.000836733
Adipose_Visceral_Omentum	15_62136332_A_G_b37	ENSG00000129003.11	VPS13C	0.983533	ENSG00000151715.3	TMEM45B	0.877146	0.047102
Adipose_Visceral_Omentum	17_63083850_G_C_b37	ENSG00000232457.3	SLC16A6P1	0.735781	ENSG00000228703.1		1	0.0941667
Adipose_Visceral_Omentum	2_85125033_C_T_b37	ENSG00000186854.6	TRABD2A	0.978524	ENSG00000270640.1	RP11-373D23.2	1	0.0203541
Adipose_Visceral_Omentum	9_26926216_C_T_b37	ENSG00000096872.11	IFT74	0.965907	ENSG00000272558.1	U91328.21	1	0.0373135
Adipose_Visceral_Omentum	12_112565472_G_T_b37	ENSG00000198270.8	TMEM116	0.959725	ENSG00000246203.2	RP11-29H23.5	0.717032	0.00220454
Adipose_Visceral_Omentum	5_76880673_A_C_b37	ENSG00000164253.8	WDR41	0.973052	ENSG00000197568.9	HHLA3	0.627827	0.0568399
Adipose_Visceral_Omentum	15_44082088_C_A_b37	ENSG00000166762.12	CATSPER2	0.609326	ENSG00000267369.1	RP11-1094M14.8	0.949095	0.0871101
Adipose_Visceral_Omentum	10_102660281_G_C_b37	ENSG00000272572.1	RP11-179B2.2	1	ENSG00000174574.11	AKIRIN1	0.798639	0.0301965
Adipose_Visceral_Omentum	7_3317999_G_A_b37	ENSG00000146555.14	SDK1	0.996755	ENSG00000127824.9	TUBA4A	0.972725	0.0406817
Adipose_Visceral_Omentum	22_19929519_G_A_b37	ENSG00000093010.7	COMT	0.96183	ENSG00000131042.9	LILRB2	0.763094	0.016968
Adipose_Visceral_Omentum	1_144840703_T_A_b37	ENSG00000236943.2	RP11-640M9.1	0.278809	ENSG00000173530.5	TNFRSF10D	0.925517	0.0656372
Adipose_Visceral_Omentum	14_23030064_AT_A_b37	ENSG00000129562.6	DAD1	0.995313	ENSG00000156983.11	BRPF1	0.988284	0.070086
Adipose_Visceral_Omentum	17_47320426_TATA_T_b37	ENSG00000108798.4	ABI3	1	ENSG00000155903.7	RASA2	1	0.0192356
Adipose_Visceral_Omentum	11_65383755_G_T_b37	ENSG00000172922.4	RNASEH2C	0.999546	ENSG00000229111.1	MED4-AS1	1	0.0623062
Adipose_Visceral_Omentum	1_52100966_TA_T_b37	ENSG00000078618.15	NRD1	0.998883	ENSG00000204463.8	BAG6	0.994323	0.0626172
Adipose_Visceral_Omentum	19_15589165_A_G_b37	ENSG00000105122.8	RASAL3	1	ENSG00000241634.1	RP11-381E24.1	1	0.0257624
Adipose_Visceral_Omentum	6_71057821_G_A_b37	ENSG00000168216.6	LMBRD1	1	ENSG00000204394.8	VARS	1	0.002145
Adipose_Visceral_Omentum	15_100273607_G_C_b37	ENSG00000183060.11	LYSMD4	0.998183	ENSG00000118058.16	KMT2A	0.990615	0.000102331
Adipose_Visceral_Omentum	19_1039991_T_C_b37	ENSG00000064687.8	ABCA7	1	ENSG00000125997.5	BPIFB9P	0.979656	0.00339959
Adipose_Visceral_Omentum	12_7255640_C_T_b37	ENSG00000205885.3	C1RL-AS1	0.992673	ENSG00000271105.1	SCML2P2	1	0.0387728
Adipose_Visceral_Omentum	14_92294852_C_T_b37	ENSG00000260711.1	RP11-747H7.3	0.998651	ENSG00000175262.10	C1orf127	0.991346	0.00948802
Adipose_Visceral_Omentum	12_57376449_C_T_b37	ENSG00000166881.5	NEMP1;TMEM194A	1	ENSG00000254503.1		0.83356	0.0736194
Adipose_Visceral_Omentum	1_154487726_G_A_b37	ENSG00000163239.8	TDRD10	1	ENSG00000168288.8	MMADHC	0.951239	5.39151e-05
Adipose_Visceral_Omentum	9_137963066_C_A_b37	ENSG00000186350.8	RXRA	1	ENSG00000121578.8	B4GALT4	0.948528	0.0224379
Adipose_Visceral_Omentum	1_19523961_A_G_b37	ENSG00000127481.10	UBR4	0.979518	ENSG00000116406.14	EDEM3	0.995635	0.0173334
Adipose_Visceral_Omentum	6_29832963_G_A_b37	ENSG00000227766.1	HCG4P5	0.986942	ENSG00000259834.1	RP11-284N8.3	1	0.014876
Adipose_Visceral_Omentum	9_44240388_C_T_b37	ENSG00000154529.10	CNTNAP3B	0.241769	ENSG00000237198.2		0.194692	0.0125533
Adipose_Visceral_Omentum	5_96849619_T_C_b37	ENSG00000113441.11	LNPEP	0.98567	ENSG00000116106.7	EPHA4	0.999949	0.0160849
Adipose_Visceral_Omentum	1_1397140_C_A_b37	ENSG00000237973.1	hsa-mir-6723	0.520819	ENSG00000249863.2	RP11-177C12.1	0.954945	0.0395566
Adipose_Visceral_Omentum	17_4984882_C_CATTTT_b37	ENSG00000234327.3	AC012146.7	1	ENSG00000184060.6	ADAP2	0.966694	0.0372738
Adipose_Visceral_Omentum	19_38755092_C_G_b37	ENSG00000167642.8	SPINT2	0.992325	ENSG00000100167.15	2016-09-03	0.995509	0.0017944
Adipose_Visceral_Omentum	6_95991590_G_C_b37	ENSG00000172469.10	MANEA	0.985057	ENSG00000261120.1	RP11-62H20.1	1	0.00465624
Adipose_Visceral_Omentum	7_92820113_C_T_b37	ENSG00000177409.7	SAMD9L	0.996152	ENSG00000158526.7	TSR2	1	0.0213356
Adipose_Visceral_Omentum	3_151105231_A_G_b37	ENSG00000169313.9	P2RY12	1	ENSG00000223612.2		0.715873	0.0386642
Adipose_Visceral_Omentum	4_122639220_CA_C_b37	ENSG00000164111.10	ANXA5	1	ENSG00000124608.4	AARS2	0.896965	0.0174688
Adipose_Visceral_Omentum	2_48822381_G_A_b37	ENSG00000242441.3	GTF2A1L	0.98397	ENSG00000188662.5	HILS1	1	0.0538671
Adipose_Visceral_Omentum	12_7255640_C_T_b37	ENSG00000205885.3	C1RL-AS1	0.992673	ENSG00000248144.1	ADH1C	0.817651	0.082868
Adipose_Visceral_Omentum	12_14721568_T_C_b37	ENSG00000256751.1	PLBD1-AS1;RP11-695J4.2	1	ENSG00000270141.2	TERC	1	0.0656129
Adipose_Visceral_Omentum	19_19887108_C_T_b37	ENSG00000266904.1	LINC00663	0.985801	ENSG00000136045.7	PWP1	0.889274	0.0340477
Adipose_Visceral_Omentum	3_112709033_T_C_b37	ENSG00000163607.10	GTPBP8	0.941251	ENSG00000266642.1		1	0.0257321
Adipose_Visceral_Omentum	13_95160000_T_C_b37	ENSG00000080166.11	DCT	1	ENSG00000228812.3	LAMA5-AS1;RP11-157P1.5	1	0.0904894
Adipose_Visceral_Omentum	17_73267169_A_C_b37	ENSG00000125447.12	GGA3	0.996021	ENSG00000259806.2	CTD-2196E14.4	1	0.0226936
Adipose_Visceral_Omentum	7_150500520_C_T_b37	ENSG00000106565.13	TMEM176B	0.989565	ENSG00000171206.9	TRIM8	0.999164	0.0594837
Adipose_Visceral_Omentum	10_47698776_G_A_b37	ENSG00000186807.9	ANXA8L2	0.329147	ENSG00000163075.8	CFAP221;PCDP1	0.939877	0.0133002
Adipose_Visceral_Omentum	2_160762687_G_A_b37	ENSG00000054219.9	LY75	0.95714	ENSG00000228110.3	ST13P19	0.665507	0.0420443
Adipose_Visceral_Omentum	21_42690424_C_T_b37	ENSG00000183844.12	FAM3B	1	ENSG00000080822.12	CLDND1	0.971269	0.0567393
Adipose_Visceral_Omentum	1_226266029_A_G_b37	ENSG00000163041.5	H3F3A	0.803323	ENSG00000250966.2	RP11-402J6.3	0.303536	0.000711652
Adipose_Visceral_Omentum	15_31735715_G_T_b37	ENSG00000247728.2	RP11-932O9.7	0.425274	ENSG00000254912.2	RP11-632K20.2	0.469237	0.0193471
Adipose_Visceral_Omentum	19_41826020_A_C_b37	ENSG00000105329.5	TGFB1	0.972833	ENSG00000137177.14	KIF13A	0.98684	0.0426033
Adipose_Visceral_Omentum	17_80189590_A_T_b37	ENSG00000176155.14	CCDC57	0.963139	ENSG00000234354.2	RPS26P47	0.0806803	0.0742813
Adipose_Visceral_Omentum	11_124533798_A_C_b37	ENSG00000064199.2	SPA17	0.968879	ENSG00000268734.1	CTB-61M7.2	1	0.0937573
Adipose_Visceral_Omentum	2_85299082_C_T_b37	ENSG00000115525.12	ST3GAL5	0.993083	ENSG00000204335.3	SP5	0.992649	0.000138909
Adipose_Visceral_Omentum	7_3317999_G_A_b37	ENSG00000146555.14	SDK1	0.996755	ENSG00000117419.10	ERI3	1	0.0570379
Adipose_Visceral_Omentum	6_100104790_A_C_b37	ENSG00000123552.13	USP45	0.992883	ENSG00000235174.1	RPL39P3	0.255589	0.0712064
Adipose_Visceral_Omentum	13_41069161_G_GA_b37	ENSG00000120688.7	WBP4	1	ENSG00000265413.1	RP11-789C17.1	1	0.000180366
Adipose_Visceral_Omentum	12_99112323_A_G_b37	ENSG00000166130.10	IKBIP	0.941885	ENSG00000108306.7	FBXL20	0.982642	0.0195745
Adipose_Visceral_Omentum	5_110427752_A_G_b37	ENSG00000134987.7	WDR36	0.987741	ENSG00000267002.1		0.81291	0.0314562
Adipose_Visceral_Omentum	12_21658604_G_T_b37	ENSG00000111711.5	GOLT1B	1	ENSG00000153563.11	CD8A	0.987572	0.0587627
Adipose_Visceral_Omentum	19_23967785_A_T_b37	ENSG00000268362.1	CTD-2017D11.1	0.970968	ENSG00000144331.14	ZNF385B	1	0.0621885
Adipose_Visceral_Omentum	2_198505304_G_A_b37	ENSG00000119041.6	GTF3C3	0.992269	ENSG00000162819.7	BROX	0.9432	0.0237956
Adipose_Visceral_Omentum	17_34866546_C_T_b37	ENSG00000141140.12	MYO19	0.97172	ENSG00000242114.1	MTFP1	1	0.0322704
Adipose_Visceral_Omentum	7_123432329_A_G_b37	ENSG00000272686.1	RP11-390E23.6	1	ENSG00000268802.1	CTD-2587H19.1	0.939796	4.41349e-05
Adipose_Visceral_Omentum	6_28384723_T_TC_b37	ENSG00000235109.3	ZSCAN31	0.969815	ENSG00000129480.8	DTD2	0.872398	0.0547012
Adipose_Visceral_Omentum	4_113911891_C_T_b37	ENSG00000138660.7	AP1AR	0.998671	ENSG00000272140.2	RP11-574K11.29	0.311375	0.0694267
Adipose_Visceral_Omentum	22_22289397_G_A_b37	ENSG00000224086.3	LL22NC03-86G7.1	0.981627	ENSG00000131747.10	TOP2A	1	0.000984111
Adipose_Visceral_Omentum	20_3179361_A_C_b37	ENSG00000198171.8	DDRGK1	1	ENSG00000260528.2	FAM157C	0.158123	0.073521
Adipose_Visceral_Omentum	13_32874975_C_T_b37	ENSG00000230633.1	RP11-37E23.5	1	ENSG00000235531.5	MSC-AS1;RP11-383H13.1	0.92286	0.0899901
Adipose_Visceral_Omentum	1_154487726_G_A_b37	ENSG00000163239.8	TDRD10	1	ENSG00000167978.12	SRRM2	0.994854	0.0500974
Adipose_Visceral_Omentum	9_136298729_G_C_b37	ENSG00000148290.5	SURF1	1	ENSG00000163281.7	GNPDA2	1	0.0286519
Adipose_Visceral_Omentum	20_48973810_A_C_b37	ENSG00000124216.3	SNAI1	0.989422	ENSG00000174951.6	FUT1	0.871612	1.0086e-05
Adipose_Visceral_Omentum	9_170391_G_C_b37	ENSG00000172785.14	CBWD1	0.230306	ENSG00000204790.8	CBWD6	0.203284	5.43766e-07
Adipose_Visceral_Omentum	17_13505903_G_C_b37	ENSG00000153976.2	HS3ST3A1	0.919396	ENSG00000230550.1	RP11-74C13.3	1	0.0715045
Adipose_Visceral_Omentum	12_124196891_C_G_b37	ENSG00000168778.7	TCTN2	0.894383	ENSG00000155085.11	AK9	0.977756	0.0738549
Adipose_Visceral_Omentum	3_48888121_A_C_b37	ENSG00000178252.13	WDR6	0.988352	ENSG00000109625.14	CPZ	0.999513	0.00584082
Adipose_Visceral_Omentum	15_49928640_C_T_b37	ENSG00000259531.2	RP11-295H24.3	0.955981	ENSG00000072135.8	PTPN18	0.987291	0.0317227
Adipose_Visceral_Omentum	15_31058693_C_T_b37	ENSG00000166664.9	CHRFAM7A	0.419253	ENSG00000223509.4	RP11-632K20.7	0.376749	0.00165198
Adipose_Visceral_Omentum	16_470233_A_AGT_b37	ENSG00000242612.2	DECR2	0.955846	ENSG00000198815.4	FOXJ3	0.969012	0.0572715
Adrenal_Gland	19_8394092_T_C_b37	ENSG00000233927.4	RPS28	0.949371	ENSG00000237039.1	AC018738.2	0.285539	4.05842e-08
Adrenal_Gland	3_39448804_G_A_b37	ENSG00000168028.9	RPSA	0.787579	ENSG00000183298.4	RPSAP19	0.153558	0
Adrenal_Gland	3_46619238_T_A_b37	ENSG00000163827.8	LRRC2	0.888843	ENSG00000225366.4	TDGF1P3	0.68144	3.89356e-07
Adrenal_Gland	3_46619238_T_A_b37	ENSG00000241186.3	TDGF1	0.701517	ENSG00000225366.4	TDGF1P3	0.68144	1.11022e-15
Adrenal_Gland	19_8394092_T_C_b37	ENSG00000233927.4	RPS28	0.949371	ENSG00000227097.4	RPS28P7	0.340555	0.00576041
Adrenal_Gland	6_32123973_C_G_b37	ENSG00000204308.6	RNF5	0.796078	ENSG00000253570.1	RNF5P1	0.803648	0.00945073
Adrenal_Gland	6_26668216_G_A_b37	ENSG00000233631.2	RP11-457M11.2	0.503836	ENSG00000188801.8	ZNF322P1	0.514348	0.00881362
Adrenal_Gland	6_26668937_C_G_b37	ENSG00000181315.6	ZNF322	0.526872	ENSG00000188801.8	ZNF322P1	0.514348	0.0641789
Adrenal_Gland	17_44824213_T_G_b37	ENSG00000262539.1	RP11-259G18.3	0.477597	ENSG00000214425.2	LRRC37A4P	0.346458	0.0783783
Adrenal_Gland	6_33548090_A_AG_b37	ENSG00000030110.8	BAK1	0.515117	ENSG00000175730.7	BAK1P1	0.62236	1.99699e-06
Adrenal_Gland	17_44824213_T_G_b37	ENSG00000262539.1	RP11-259G18.3	0.477597	ENSG00000264070.1	DND1P1	0.488832	0.0413555
Adrenal_Gland	17_44797919_C_T_b37	ENSG00000214401.4	KANSL1-AS1	1	ENSG00000120088.10	CRHR1	0.979848	0.0529457
Adrenal_Gland	16_2013756_T_C_b37	ENSG00000255513.1	AC005363.9	0.98556	ENSG00000228981.3	RP11-364L4.1	0.351207	0.071441
Adrenal_Gland	16_70427625_G_T_b37	ENSG00000157335.15	CLEC18C	0.343371	ENSG00000140839.7	CLEC18B	0.38105	1.03788e-06
Adrenal_Gland	17_18549105_G_C_b37	ENSG00000233327.6	USP32P2	0.320513	ENSG00000188933.10	USP32P1	0.359227	0.0747357
Adrenal_Gland	17_44852612_A_C_b37	ENSG00000120071.8	KANSL1	0.979025	ENSG00000265218.1		0.303974	0.0390711
Adrenal_Gland	7_128308386_C_T_b37	ENSG00000242588.2	RP11-274B21.1	0.265695	ENSG00000234419.1	CICP13	0.21686	2.22423e-05
Adrenal_Gland	7_128318168_A_G_b37	ENSG00000243679.1	RP11-274B21.3	0.345899	ENSG00000234419.1	CICP13	0.21686	9.99911e-05
Adrenal_Gland	7_128318168_A_G_b37	ENSG00000230715.2	RP11-274B21.4	0.292784	ENSG00000234419.1	CICP13	0.21686	1.34456e-06
Adrenal_Gland	7_128269933_G_A_b37	ENSG00000243302.3	RP11-274B21.2	0.160049	ENSG00000234419.1	CICP13	0.21686	2.67126e-09
Adrenal_Gland	5_70679626_G_A_b37	ENSG00000230847.4	RP11-195E2.1	0.5	ENSG00000197822.6	OCLN	0.46568	2.22045e-16
Adrenal_Gland	5_70679626_G_A_b37	ENSG00000145736.10	GTF2H2	0.319057	ENSG00000197822.6	OCLN	0.46568	6.33792e-05
Adrenal_Gland	11_8014479_C_T_b37	ENSG00000175390.8	EIF3F	0.908951	ENSG00000233426.2	EIF3FP3	0.718878	0
Adrenal_Gland	7_128294349_T_C_b37	ENSG00000229413.1	AC018638.1	0.163782	ENSG00000234419.1	CICP13	0.21686	0.0122458
Adrenal_Gland	17_18549264_G_A_b37	ENSG00000250111.3	AC107982.4	0.255727	ENSG00000188933.10	USP32P1	0.359227	0.000179647
Adrenal_Gland	7_56155759_C_T_b37	ENSG00000106153.12	CHCHD2	0.743146	ENSG00000235084.2	CHCHD2P6	0.619416	3.55271e-15
Adrenal_Gland	7_128199418_T_A_b37	ENSG00000271344.1	RP11-274B21.9	0.997904	ENSG00000233771.2	CICP5	0.159844	0.0672095
Adrenal_Gland	5_70680666_G_A_b37	ENSG00000254353.1	RP11-195E2.4	0.375074	ENSG00000197822.6	OCLN	0.46568	1.26871e-05
Adrenal_Gland	5_79932099_G_A_b37	ENSG00000228716.2	DHFR	0.516943	ENSG00000188985.5	DHFRP1	0.554804	0
Adrenal_Gland	14_36108203_AAG_A_b37	ENSG00000174373.11	RALGAPA1	0.736465	ENSG00000229419.1	RALGAPA1P	0.721176	0
Adrenal_Gland	7_128308386_C_T_b37	ENSG00000242588.2	RP11-274B21.1	0.265695	ENSG00000214837.4	LINC01347	0.203684	1.73395e-12
Adrenal_Gland	7_128318168_A_G_b37	ENSG00000243679.1	RP11-274B21.3	0.345899	ENSG00000214837.4	LINC01347	0.203684	0.0726201
Adrenal_Gland	7_128318168_A_G_b37	ENSG00000230715.2	RP11-274B21.4	0.292784	ENSG00000214837.4	LINC01347	0.203684	0.00186865
Adrenal_Gland	7_128269933_G_A_b37	ENSG00000243302.3	RP11-274B21.2	0.160049	ENSG00000214837.4	LINC01347	0.203684	0.00109911
Adrenal_Gland	2_224832136_C_G_b37	ENSG00000228802.1	AC073641.2	1	ENSG00000213144.2	RP11-64B16.2	0.824841	0.0189386
Adrenal_Gland	16_69964374_G_A_b37	ENSG00000196696.8	PDXDC2P	0.507387	ENSG00000140839.7	CLEC18B	0.38105	0.00340268
Adrenal_Gland	15_83674706_A_G_b37	ENSG00000169612.3	FAM103A1	0.628793	ENSG00000235272.1	FAM103A2P	0.617262	0.00383198
Adrenal_Gland	6_153306749_T_G_b37	ENSG00000112031.11	MTRF1L	0.545717	ENSG00000180015.11	RP11-756P10.3	0.666511	0.00648107
Adrenal_Gland	7_128269933_G_A_b37	ENSG00000243302.3	RP11-274B21.2	0.160049	ENSG00000233771.2	CICP5	0.159844	8.21196e-07
Adrenal_Gland	1_151753318_T_G_b37	ENSG00000182134.11	TDRKH	1	ENSG00000196182.6	STK40	0.999893	0.0501158
Adrenal_Gland	6_31918860_A_G_b37	ENSG00000244731.3	C4A	0.506796	ENSG00000253570.1	RNF5P1	0.803648	0.00959785
Adrenal_Gland	17_43688579_A_G_b37	ENSG00000238083.3	LRRC37A2	0.239232	ENSG00000108379.5	WNT3	0.997901	0.00544287
Adrenal_Gland	7_128308386_C_T_b37	ENSG00000242588.2	RP11-274B21.1	0.265695	ENSG00000233771.2	CICP5	0.159844	2.65537e-07
Adrenal_Gland	7_128318168_A_G_b37	ENSG00000243679.1	RP11-274B21.3	0.345899	ENSG00000233771.2	CICP5	0.159844	0.00437533
Adrenal_Gland	7_128318168_A_G_b37	ENSG00000230715.2	RP11-274B21.4	0.292784	ENSG00000233771.2	CICP5	0.159844	0.000305464
Adrenal_Gland	3_39448804_G_A_b37	ENSG00000168028.9	RPSA	0.787579	ENSG00000237506.2	RPSAP15	0.210452	0
Adrenal_Gland	17_36415046_C_A_b37	ENSG00000185128.11	TBC1D3F	0.126451	ENSG00000109771.11	LRP2BP	0.94575	0.0385026
Adrenal_Gland	1_53461264_T_A_b37	ENSG00000058804.10	NDC1	1	ENSG00000232645.1	LINC01431	1	0.00277156
Adrenal_Gland	1_38461821_C_T_b37	ENSG00000183386.5	FHL3	1	ENSG00000136270.9	TBRG4	0.995747	0.0809104
Adrenal_Gland	17_20970761_G_A_b37	ENSG00000124422.7	USP22	0.950496	ENSG00000161642.13	ZNF385A	0.983313	0.0129558
Adrenal_Gland	1_151753318_T_G_b37	ENSG00000182134.11	TDRKH	1	ENSG00000106025.4	TSPAN12	0.993821	0.0249691
Adrenal_Gland	7_128294349_T_C_b37	ENSG00000229413.1	AC018638.1	0.163782	ENSG00000233771.2	CICP5	0.159844	0.00511877
Adrenal_Gland	14_24221118_T_C_b37	ENSG00000092051.12	JPH4	0.999932	ENSG00000270760.1	AD001527.7	1	0.0513917
Adrenal_Gland	22_31207693_C_G_b37	ENSG00000250318.1	CTA-963H5.5	0.992816	ENSG00000143190.17	POU2F1	0.984626	0.0507843
Adrenal_Gland	4_104099110_G_A_b37	ENSG00000164039.10	BDH2	0.9046	ENSG00000232699.2	BDH2P1	0.909639	5.70291e-07
Adrenal_Gland	10_63440579_C_T_b37	ENSG00000183346.6	C10orf107	1	ENSG00000138758.7	2016-09-11	0.981875	0.00205016
Adrenal_Gland	12_70965479_A_G_b37	ENSG00000111596.7	CNOT2	0.977865	ENSG00000235781.1	XXbac-BPG249D20.9	0.863675	0.0139277
Adrenal_Gland	12_70965479_A_G_b37	ENSG00000135643.4	KCNMB4	0.950297	ENSG00000235781.1	XXbac-BPG249D20.9	0.863675	0.000999471
Adrenal_Gland	1_226258009_C_T_b37	ENSG00000163041.5	H3F3A	0.803323	ENSG00000250966.2	RP11-402J6.3	0.303536	0
Adrenal_Gland	7_128308386_C_T_b37	ENSG00000242588.2	RP11-274B21.1	0.265695	ENSG00000233003.3	CICP26	0.146907	0.0058184
Adrenal_Gland	7_128318168_A_G_b37	ENSG00000243679.1	RP11-274B21.3	0.345899	ENSG00000233003.3	CICP26	0.146907	3.40084e-05
Adrenal_Gland	7_128318168_A_G_b37	ENSG00000230715.2	RP11-274B21.4	0.292784	ENSG00000233003.3	CICP26	0.146907	0.00227641
Adrenal_Gland	22_45554435_G_A_b37	ENSG00000226328.2	CTA-217C2.1;NUP50-AS1	0.944746	ENSG00000235688.1	AC116614.1	1	0.0381117
Adrenal_Gland	7_128294349_T_C_b37	ENSG00000229413.1	AC018638.1	0.163782	ENSG00000253326.2	RP11-261C10.7	0.34244	0.000163123
Adrenal_Gland	5_176799992_T_C_b37	ENSG00000169220.13	RGS14	1	ENSG00000250090.1	RP13-401N8.3	0.455405	0.00397642
Adrenal_Gland	7_128269933_G_A_b37	ENSG00000243302.3	RP11-274B21.2	0.160049	ENSG00000233003.3	CICP26	0.146907	0.00264809
Adrenal_Gland	13_48694091_C_G_b37	ENSG00000260388.1	LINC00562	0.923367	ENSG00000198315.6	ZKSCAN8	0.970194	0.0196469
Adrenal_Gland	7_133530806_C_A_b37	ENSG00000131558.10	EXOC4	0.992882	ENSG00000121957.8	GPSM2	0.887601	0.0138509
Adrenal_Gland	19_33010306_G_A_b37	ENSG00000130881.9	LRP3	0.998281	ENSG00000164919.6	COX6C	0.923101	0.0431294
Adrenal_Gland	7_128318168_A_G_b37	ENSG00000243679.1	RP11-274B21.3	0.345899	ENSG00000253326.2	RP11-261C10.7	0.34244	9.49811e-06
Adrenal_Gland	7_128318168_A_G_b37	ENSG00000230715.2	RP11-274B21.4	0.292784	ENSG00000253326.2	RP11-261C10.7	0.34244	5.98141e-05
Adrenal_Gland	2_9285990_G_C_b37	ENSG00000171848.9	RRM2	0.84409	ENSG00000117399.9	CDC20	0.884471	0
Adrenal_Gland	7_128308386_C_T_b37	ENSG00000242588.2	RP11-274B21.1	0.265695	ENSG00000253326.2	RP11-261C10.7	0.34244	0.00781356
Adrenal_Gland	1_167517829_T_C_b37	ENSG00000143162.7	CREG1	1	ENSG00000151729.6	SLC25A4	0.965034	0.0157194
Adrenal_Gland	2_9285990_G_C_b37	ENSG00000171848.9	RRM2	0.84409	ENSG00000175063.12	UBE2C	0.951659	0
Adrenal_Gland	1_167517829_T_C_b37	ENSG00000143162.7	CREG1	1	ENSG00000105894.7	PTN	0.99869	0.0209406
Adrenal_Gland	19_5853563_C_G_b37	ENSG00000034063.9	UHRF1	0.760462	ENSG00000165304.3	MELK	0.951494	7.99361e-15
Adrenal_Gland	6_26828913_G_T_b37	ENSG00000261584.1	RP11-457M11.5	0.552298	ENSG00000229931.1	RP1-151F17.1	1	0.0775587
Adrenal_Gland	16_9182454_T_C_b37	ENSG00000153048.6	CARHSP1	0.956437	ENSG00000165025.10	SYK	0.961304	0.0349469
Adrenal_Gland	3_195733721_G_C_b37	ENSG00000163961.4	RNF168	0.893332	ENSG00000185238.8	PRMT3	1	0.0335516
Adrenal_Gland	17_44314940_AT_A_b37	ENSG00000185829.11	ARL17A	0.266661	ENSG00000188958.5	UTS2B	0.766504	0.0164365
Adrenal_Gland	16_71804956_C_G_b37	ENSG00000040199.14	PHLPP2	0.965867	ENSG00000168264.6	IRF2BP2	0.997115	0.0890216
Adrenal_Gland	4_1354525_T_C_b37	ENSG00000254094.1	AC078852.1	1	ENSG00000242479.1	RP11-383G6.4	0.992401	0.0653437
Adrenal_Gland	2_75185856_G_T_b37	ENSG00000204792.2	AC104135.3;LINC01291	1	ENSG00000135272.5	MDFIC	0.957644	0.0980723
Adrenal_Gland	19_45217194_C_T_b37	ENSG00000266903.1	CTB-171A8.1	0.973848	ENSG00000150401.10	DCUN1D2	0.930205	0.0850013
Adrenal_Gland	6_1016984_G_A_b37	ENSG00000137273.3	FOXF2	0.998413	ENSG00000114812.8	VIPR1	0.99939	0.043614
Adrenal_Gland	22_22652491_G_C_b37	ENSG00000236850.4	BMS1P20	0.631584	ENSG00000105254.7	TBCB	0.970153	0.0499211
Adrenal_Gland	22_43551007_C_T_b37	ENSG00000100300.13	TSPO	1	ENSG00000188985.5	DHFRP1	0.554804	0.0446053
Adrenal_Gland	17_18151611_C_A_b37	ENSG00000154874.10	CCDC144B	0.353022	ENSG00000188933.10	USP32P1	0.359227	4.80398e-06
Adrenal_Gland	6_134204247_A_G_b37	ENSG00000118526.6	TCF21	0.996555	ENSG00000148426.8	PROSER2	1	0.00106265
Adrenal_Gland	7_66136281_C_T_b37	ENSG00000251451.1	GS1-124K5.6;GTF2IP9	1	ENSG00000259583.1	RP11-66B24.4	0.981426	0.0798475
Adrenal_Gland	10_73833908_C_A_b37	ENSG00000107742.8	SPOCK2	0.999267	ENSG00000174177.8	CTU2	0.984337	0.0411899
Adrenal_Gland	19_39969763_T_TG_b37	ENSG00000196235.9	SUPT5H	0.994003	ENSG00000178715.7	RP11-169K16.8	0.895045	4.22576e-05
Adrenal_Gland	5_43123079_G_C_b37	ENSG00000272382.1	CTD-2035E11.4	1	ENSG00000172348.10	RCAN2	1	0.060217
Adrenal_Gland	20_4057885_T_G_b37	ENSG00000101200.5	AVP	0.978054	ENSG00000240522.1	RPL7AP10	0.987448	0.0162875
Adrenal_Gland	1_55443605_C_G_b37	ENSG00000233271.1	RP11-12C17.2	1	ENSG00000271978.1	RP11-428J1.4	0.87936	0.0676167
Adrenal_Gland	6_33197571_C_T_b37	ENSG00000231500.2	RPS18	0.870495	ENSG00000242299.1		0.523809	0
Adrenal_Gland	2_9285990_G_C_b37	ENSG00000171848.9	RRM2	0.84409	ENSG00000166803.6	KIAA0101	0.829429	0
Adrenal_Gland	21_47617489_T_G_b37	ENSG00000235878.4	AP001468.1	0.40146	ENSG00000134222.12	PSRC1	1	0.0242657
Adrenal_Gland	1_17222243_C_T_b37	ENSG00000238142.1	RP11-108M9.4	0.703089	ENSG00000237341.1	SYP-AS1	1	0.00102844
Adrenal_Gland	2_7164210_G_T_b37	ENSG00000151692.10	RNF144A	0.96455	ENSG00000139289.9	PHLDA1	0.971689	0.0517128
Adrenal_Gland	11_34936530_A_G_b37	ENSG00000149089.8	APIP	0.907903	ENSG00000225531.1	RP11-196I18.3	0.871756	7.57712e-05
Adrenal_Gland	16_16296488_G_A_b37	ENSG00000103226.13	NOMO3	0.347829	ENSG00000254681.2	PKD1P5	0.280036	0.0187328
Adrenal_Gland	16_16296488_G_A_b37	ENSG00000244257.4	PKD1P1	0.186338	ENSG00000254681.2	PKD1P5	0.280036	0.0897483
Adrenal_Gland	16_16296488_G_A_b37	ENSG00000183889.8	AC138969.4	0.146547	ENSG00000254681.2	PKD1P5	0.280036	0.0730931
Adrenal_Gland	10_71775087_G_GA_b37	ENSG00000099284.9	H2AFY2	1	ENSG00000173947.9	PIFO	1	0.0393692
Adrenal_Gland	15_40328292_A_G_b37	ENSG00000128829.7	EIF2AK4	0.972385	ENSG00000169902.9	TPST1	0.985684	0.0274001
Adrenal_Gland	1_21496687_C_T_b37	ENSG00000244038.5	DDOST	0.851718	ENSG00000228589.2	SPCS2P4	0.56651	1.17715e-06
Adrenal_Gland	7_64324352_C_A_b37	ENSG00000164669.8	INTS4L1;INTS4P1	0.755898	ENSG00000011304.12	PTBP1	0.998756	0.0763174
Adrenal_Gland	6_1016984_G_A_b37	ENSG00000137273.3	FOXF2	0.998413	ENSG00000169288.13	MRPL1	1	0.0632748
Adrenal_Gland	17_41231516_C_T_b37	ENSG00000198496.6	NBR2	0.906966	ENSG00000164117.8	FBXO8	1	0.0353127
Adrenal_Gland	2_9285990_G_C_b37	ENSG00000171848.9	RRM2	0.84409	ENSG00000131747.10	TOP2A	1	0
Adrenal_Gland	15_56548605_C_A_b37	ENSG00000151575.10	TEX9	0.880793	ENSG00000151229.8	SLC2A13	0.995544	0.00840611
Adrenal_Gland	12_54575800_C_A_b37	ENSG00000123415.10	SMUG1	0.964125	ENSG00000145723.12	GIN1	0.963363	0.000674031
Adrenal_Gland	6_31336757_A_G_b37	ENSG00000234745.5	HLA-B	0.902096	ENSG00000241106.2	HLA-DOB	1	5.32061e-06
Adrenal_Gland	1_25583610_C_G_b37	ENSG00000224183.1	SDHDP6	0.34532	ENSG00000164828.13	SUN1	0.961115	0.0914888
Adrenal_Gland	2_203175467_A_T_b37	ENSG00000138380.13	CARF	0.899642	ENSG00000249971.1	RP11-256P1.1	1	0.0178632
Adrenal_Gland	1_3843718_TTATC_T_b37	ENSG00000169598.11	DFFB	0.837538	ENSG00000232134.1	RPS15AP12	0.755573	0.0148047
Adrenal_Gland	1_222725850_T_C_b37	ENSG00000225265.1	RP11-378J18.3;TAF1A-AS1	1	ENSG00000079101.12	CLUL1	0.982666	0.0610118
Adrenal_Gland	9_117091169_G_A_b37	ENSG00000095397.9	DFNB31	0.99363	ENSG00000249568.1		0.98477	0.0464438
Adrenal_Gland	16_89668414_C_T_b37	ENSG00000204991.6	SPIRE2	0.8342	ENSG00000214439.3	FAM185BP	0.592105	0.0827093
Adrenal_Gland	16_70382179_C_T_b37	ENSG00000261556.4	RP11-296I10.6;SMG1P7	0.299949	ENSG00000140839.7	CLEC18B	0.38105	0.0880039
Adrenal_Gland	6_2876535_G_A_b37	ENSG00000230438.5	RP11-420G6.4;SERPINB9P1	0.965783	ENSG00000137414.5	FAM8A1	0.890463	0.0365131
Adrenal_Gland	1_236529877_GA_G_b37	ENSG00000186197.8	EDARADD	0.940257	ENSG00000272554.1	RP11-317L10.1	1	0.0979469
Adrenal_Gland	6_29676823_C_T_b37	ENSG00000225864.1	HCG4P11	1	ENSG00000268842.1		1	0.0429476
Adrenal_Gland	2_9285990_G_C_b37	ENSG00000171848.9	RRM2	0.84409	ENSG00000109805.5	NCAPG	0.959121	0
Adrenal_Gland	13_95239068_A_G_b37	ENSG00000152749.7	GPR180	0.999467	ENSG00000225764.1	LEPREL1-AS1;P3H2-AS1	0.498927	0.0356344
Adrenal_Gland	1_213015323_G_A_b37	ENSG00000198468.3	FLVCR1-AS1	0.972129	ENSG00000172244.4	C5orf34	1	0.00615383
Adrenal_Gland	19_6363190_G_A_b37	ENSG00000125651.9	GTF2F1	0.95022	ENSG00000076924.7	XAB2	1	4.19438e-05
Adrenal_Gland	19_4458063_A_G_b37	ENSG00000167670.11	CHAF1A	1	ENSG00000148450.8	MSRB2	0.943912	0.0353799
Adrenal_Gland	19_32895631_A_C_b37	ENSG00000267213.3	AC007773.2	1	ENSG00000270264.1	NDUFB8P2	1	0.0311384
Adrenal_Gland	7_141362693_A_T_b37	ENSG00000244701.1	RP5-894A10.2	0.979904	ENSG00000241570.4	PAQR9-AS1;RP11-372E1.6	0.920727	0.00504666
Adrenal_Gland	2_74349839_G_A_b37	ENSG00000257800.1	FNBP1P1	0.987391	ENSG00000130595.12	TNNT3	1	0.0168677
Adrenal_Gland	9_108455088_C_T_b37	ENSG00000095209.7	TMEM38B	0.989306	ENSG00000100354.16	TNRC6B	0.980789	0.000911946
Adrenal_Gland	5_70568209_G_A_b37	ENSG00000226259.6	GTF2H2B	0.336043	ENSG00000183474.11	GTF2H2C	0.310848	2.3918e-06
Adrenal_Gland	19_55547430_G_A_b37	ENSG00000267265.1	CTC-550B14.7	1	ENSG00000239900.7	ADSL	0.979267	0.0566904
Adrenal_Gland	1_202133251_AG_A_b37	ENSG00000243323.1	PTPRVP	0.968217	ENSG00000158109.10	TPRG1L	0.957124	0.0349276
Adrenal_Gland	12_27863531_T_C_b37	ENSG00000256377.1	RP11-1060J15.4	0.996664	ENSG00000250237.1		1	0.0362458
Adrenal_Gland	9_88702202_A_G_b37	ENSG00000135052.12	GOLM1	0.976482	ENSG00000159399.5	HK2	0.784095	0.0511254
Adrenal_Gland	12_27848344_T_C_b37	ENSG00000174236.2	REP15	1	ENSG00000250237.1		1	0.0523074
Adrenal_Gland	7_141460758_A_G_b37	ENSG00000228775.3	WEE2-AS1	1	ENSG00000271020.1	RP11-10C24.1	1	0.00549881
Adrenal_Gland	12_9823178_G_C_b37	ENSG00000069493.10	CLEC2D	0.842591	ENSG00000249249.1	AC010226.4	1	0.04407
Adrenal_Gland	7_128269933_G_A_b37	ENSG00000243302.3	RP11-274B21.2	0.160049	ENSG00000253326.2	RP11-261C10.7	0.34244	0.00121467
Adrenal_Gland	16_27376637_A_G_b37	ENSG00000077238.9	IL4R	0.992927	ENSG00000175203.11	DCTN2	0.993824	0.0419957
Adrenal_Gland	2_3609064_G_A_b37	ENSG00000234171.1	AC108488.3;RNASEH1-AS1	1	ENSG00000235576.1		1	0.0663545
Adrenal_Gland	12_68847992_A_G_b37	ENSG00000251301.2	RP11-81H14.2	0.989685	ENSG00000211750.2	TRBV24-1	0.835273	0.0199054
Adrenal_Gland	17_18153892_C_T_b37	ENSG00000177427.8	MIEF2	0.90156	ENSG00000122512.10	PMS2	0.690222	0.0446885
Adrenal_Gland	6_2876535_G_A_b37	ENSG00000230438.5	RP11-420G6.4;SERPINB9P1	0.965783	ENSG00000179954.10	SSC5D	0.991895	0.00532332
Adrenal_Gland	9_95172242_G_C_b37	ENSG00000188312.9	CENPP	0.972434	ENSG00000215104.4		1	0.0919084
Adrenal_Gland	19_57993808_C_G_b37	ENSG00000105136.15	ZNF419	0.838719	ENSG00000226976.1	COX6A1P2	0.614668	0.0279247
Adrenal_Gland	15_32920064_G_A_b37	ENSG00000262728.1	AC123768.4	0.436909	ENSG00000153666.5	GOLGA8I	0.140195	3.02804e-08
Adrenal_Gland	15_41626148_A_G_b37	ENSG00000247556.2	OIP5-AS1	0.874906	ENSG00000262333.1	HNRNPA1P16	0.819709	0.0544756
Adrenal_Gland	7_43999695_C_T_b37	ENSG00000239556.2	AC004951.5	0.532755	ENSG00000072163.14	LIMS2	0.999665	0.057556
Adrenal_Gland	16_75581069_G_A_b37	ENSG00000065457.6	ADAT1	0.932664	ENSG00000103381.7	CPPED1	0.926441	0.0966616
Adrenal_Gland	17_3552727_C_T_b37	ENSG00000040531.10	CTNS	0.979092	ENSG00000066056.9	TIE1	0.960693	0.0497636
Adrenal_Gland	1_35995798_G_A_b37	ENSG00000054116.7	TRAPPC3	0.992831	ENSG00000253731.1	PCDHGA6	0.947218	0.018934
Adrenal_Gland	14_22024106_C_T_b37	ENSG00000257096.1	AE000658.22	1	ENSG00000223612.2		0.715873	0.0411635
Adrenal_Gland	1_230916260_C_T_b37	ENSG00000135773.8	CAPN9	1	ENSG00000105398.3	SULT2A1	0.829608	0.0303717
Adrenal_Gland	15_78247292_C_G_b37	ENSG00000214646.4	RP11-114H24.4	0.760079	ENSG00000233878.1	AC073133.1	1	0.00247532
Adrenal_Gland	21_45759045_C_T_b37	ENSG00000241728.1	AP001062.8	1	ENSG00000187021.10	PNLIPRP1	0.990433	0.0679848
Adrenal_Gland	14_73868346_T_C_b37	ENSG00000100767.11	PAPLN	0.92292	ENSG00000102554.9	KLF5	1	2.81344e-10
Adrenal_Gland	22_38689652_G_C_b37	ENSG00000213923.6	CSNK1E	0.910139	ENSG00000078304.15	PPP2R5C	0.950694	0.0123566
Adrenal_Gland	2_155542557_G_A_b37	ENSG00000162989.3	KCNJ3	0.947513	ENSG00000264451.1	RP11-433M22.2	0.972725	0.0158195
Adrenal_Gland	1_241838748_T_C_b37	ENSG00000174371.12	EXO1	0.999627	ENSG00000100162.10	CENPM	1	0
Adrenal_Gland	9_86052945_T_C_b37	ENSG00000172159.11	FRMD3	0.996463	ENSG00000124635.7	HIST1H2BJ	0.962072	0.0614602
Adrenal_Gland	2_9285990_G_C_b37	ENSG00000171848.9	RRM2	0.84409	ENSG00000156970.8	BUB1B	0.980797	0
Adrenal_Gland	7_56200254_A_T_b37	ENSG00000185290.3	NUPR1L	0.926096	ENSG00000235084.2	CHCHD2P6	0.619416	0.015243
Adrenal_Gland	2_225476923_T_C_b37	ENSG00000124019.9	FAM124B	0.977238	ENSG00000162618.8	ADGRL4;ELTD1	1	0.0061429
Adrenal_Gland	6_87896612_G_A_b37	ENSG00000203872.6	C6orf163	0.931289	ENSG00000258122.1	RP11-61A14.1	1	0.0476977
Adrenal_Gland	1_66393106_T_TTA_b37	ENSG00000116675.11	DNAJC6	0.995798	ENSG00000269553.1	U62631.5	0.985046	0.0831277
Adrenal_Gland	2_9285990_G_C_b37	ENSG00000171848.9	RRM2	0.84409	ENSG00000112984.7	KIF20A	0.997687	0
Adrenal_Gland	9_111929624_C_G_b37	ENSG00000260230.2	FRRS1L	0.903465	ENSG00000152580.8	IGSF10	0.993918	0.0288768
Adrenal_Gland	19_4794257_T_G_b37	ENSG00000141965.3	FEM1A	0.70664	ENSG00000055118.10	KCNH2	0.992244	0.0795761
Adrenal_Gland	17_19530369_TA_T_b37	ENSG00000264932.2	Y_RNA	1	ENSG00000262097.1	CTD-2135D7.5	1	0.0175593
Adrenal_Gland	12_7018775_G_T_b37	ENSG00000010626.10	LRRC23	1	ENSG00000101255.6	TRIB3	0.973365	0.00697192
Adrenal_Gland	2_9285990_G_C_b37	ENSG00000171848.9	RRM2	0.84409	ENSG00000117650.8	NEK2	0.734358	2.88658e-15
Adrenal_Gland	5_173222905_T_C_b37	ENSG00000254211.1	CTB-43E15.4;LINC01485	1	ENSG00000154358.15	OBSCN	0.965075	0.00351746
Adrenal_Gland	15_82511296_G_T_b37	ENSG00000259328.1	RP11-152F13.7	0.182804	ENSG00000005955.8	GGNBP2	0.996073	0.0238384
Adrenal_Gland	1_11899636_G_A_b37	ENSG00000242349.1	NPPA-AS1	1	ENSG00000231443.2	AC024937.6	0.338772	0.0827242
Adrenal_Gland	2_9285990_G_C_b37	ENSG00000171848.9	RRM2	0.84409	ENSG00000065328.12	MCM10	0.978434	0
Adrenal_Gland	4_83662588_C_A_b37	ENSG00000249242.3	TMEM150C	0.942504	ENSG00000179922.5	ZNF784	1	0.0837823
Adrenal_Gland	1_113085197_C_A_b37	ENSG00000273483.1	RP4-671G15.2	1	ENSG00000230454.1	U73166.2	0.954348	0.0462026
Adrenal_Gland	2_55508336_T_C_b37	ENSG00000115306.11	SPTBN1	0.999543	ENSG00000170144.14	HNRNPA3	0.686423	0.0768282
Adrenal_Gland	17_17988299_C_T_b37	ENSG00000072310.12	SREBF1	0.995493	ENSG00000139370.6	SLC15A4	0.988025	0.0288065
Adrenal_Gland	11_817786_C_T_b37	ENSG00000177595.13	PIDD;PIDD1	0.982008	ENSG00000262995.1	CTD-2194A8.2	0.707439	0.00498139
Adrenal_Gland	16_16291816_G_C_b37	ENSG00000227827.3	RP11-958N24.2	0.279822	ENSG00000214940.4	NPIPA8	0.167763	1.7654e-10
Adrenal_Gland	9_140441177_A_G_b37	ENSG00000130653.11	PNPLA7	0.999628	ENSG00000108306.7	FBXL20	0.982642	0.0767598
Adrenal_Gland	13_20785249_C_T_b37	ENSG00000213621.3	RPSAP54	0.254422	ENSG00000072818.7	ACAP1	0.971919	0.0555551
Adrenal_Gland	2_207654106_A_G_b37	ENSG00000138400.8	MDH1B	1	ENSG00000160211.11	G6PD	1	0.0740264
Adrenal_Gland	3_125566651_G_A_b37	ENSG00000241288.3	RP11-379B18.5	0.608743	ENSG00000086570.8	FAT2	1	0.0965298
Adrenal_Gland	2_9285990_G_C_b37	ENSG00000171848.9	RRM2	0.84409	ENSG00000127564.12	PKMYT1	1	0
Adrenal_Gland	7_128188195_C_T_b37	ENSG00000271553.1	RP11-274B21.10	1	ENSG00000186314.7	PRELID2	0.948465	0.00514677
Adrenal_Gland	2_74345206_A_G_b37	ENSG00000217702.1	MGC10955	1	ENSG00000145423.4	SFRP2	1	0.0582637
Adrenal_Gland	12_120329106_C_T_b37	ENSG00000111725.6	PRKAB1	0.925783	ENSG00000168002.7	POLR2G	1	0.0665123
Adrenal_Gland	2_9285990_G_C_b37	ENSG00000171848.9	RRM2	0.84409	ENSG00000154920.10	EME1	0.983233	0
Adrenal_Gland	5_167911710_G_A_b37	ENSG00000188573.7	FBLL1	1	ENSG00000109919.5	MTCH2	0.991694	0.0169053
Adrenal_Gland	12_21621891_T_C_b37	ENSG00000121350.11	PYROXD1	0.625754	ENSG00000234719.4	RP11-166B2.1	0.29016	0.0477629
Adrenal_Gland	17_36415046_C_A_b37	ENSG00000185128.11	TBC1D3F	0.126451	ENSG00000136319.7	TTC5	0.960821	0.000176575
Adrenal_Gland	12_47642732_C_T_b37	ENSG00000258181.1	RP11-493L12.4	0.729751	ENSG00000267356.1	RP11-411B10.3	1	0.0496586
Adrenal_Gland	14_23426422_A_G_b37	ENSG00000092036.12	HAUS4	0.973696	ENSG00000152700.9	SAR1B	0.888154	0.0001833
Adrenal_Gland	5_70680666_G_A_b37	ENSG00000254353.1	RP11-195E2.4	0.375074	ENSG00000151247.8	EIF4E	0.834319	0.0536707
Adrenal_Gland	22_44607344_A_T_b37	ENSG00000138964.12	PARVG	0.995794	ENSG00000260470.1	RP11-834C11.11	1	0.00832022
Adrenal_Gland	15_50456490_C_T_b37	ENSG00000104043.10	ATP8B4	0.999517	ENSG00000110975.4	SYT10	1	0.0911702
Adrenal_Gland	9_117091169_G_A_b37	ENSG00000095397.9	DFNB31	0.99363	ENSG00000071127.12	WDR1	1	0.0294499
Adrenal_Gland	2_162972339_A_G_b37	ENSG00000197635.5	DPP4	1	ENSG00000169604.15	ANTXR1	0.990023	0.0883914
Adrenal_Gland	9_3759446_C_G_b37	ENSG00000107249.17	GLIS3	0.99997	ENSG00000107443.11	CCNJ	0.831894	0.0277719
Adrenal_Gland	5_96132343_T_C_b37	ENSG00000248734.2	CTD-2260A17.1	1	ENSG00000058668.10	ATP2B4	0.999781	0.00440258
Adrenal_Gland	5_96132343_T_C_b37	ENSG00000164307.8	ERAP1	0.992485	ENSG00000058668.10	ATP2B4	0.999781	0.0949298
Adrenal_Gland	4_25919109_A_G_b37	ENSG00000250317.4	SMIM20	0.982573	ENSG00000112473.12	SLC39A7	1	0.0475672
Adrenal_Gland	11_8504500_G_T_b37	ENSG00000130413.11	STK33	0.957317	ENSG00000253618.1	GRPEL2-AS1	1	0.0254465
Adrenal_Gland	6_31379773_C_T_b37	ENSG00000204520.8	MICA	0.877782	ENSG00000137575.7	SDCBP	0.89347	0.0362344
Adrenal_Gland	7_128277220_A_G_b37	ENSG00000271529.1	CICP14	0.138156	ENSG00000226220.1	CICP22	0.223749	2.05348e-05
Adrenal_Gland	6_150143114_C_T_b37	ENSG00000231760.2	RP11-350J20.5	0.825262	ENSG00000175115.7	PACS1	0.991297	0.0361736
Adrenal_Gland	14_73868346_T_C_b37	ENSG00000100767.11	PAPLN	0.92292	ENSG00000146374.9	RSPO3	1	2.73883e-11
Adrenal_Gland	19_56731868_G_T_b37	ENSG00000133247.9	SUV420H2	0.970718	ENSG00000109452.8	INPP4B	0.978422	0.00546435
Adrenal_Gland	5_6617011_C_A_b37	ENSG00000037474.10	NSUN2	0.955399	ENSG00000102221.9	JADE3	0.999796	0.0440878
Adrenal_Gland	4_119129684_A_C_b37	ENSG00000269893.2	SNHG8	1	ENSG00000197238.3	HIST1H4J	0.534124	0.0203655
Adrenal_Gland	2_9285990_G_C_b37	ENSG00000171848.9	RRM2	0.84409	ENSG00000169679.10	BUB1	0.995665	0
Adrenal_Gland	11_66335832_G_A_b37	ENSG00000174080.6	CTSF	1	ENSG00000197056.5	ZMYM1	0.997356	0.0381702
Adrenal_Gland	12_3002538_A_G_b37	ENSG00000078246.11	TULP3	0.952558	ENSG00000224628.2	RP5-854E16.2	0.883737	0.0542513
Adrenal_Gland	7_150864913_C_T_b37	ENSG00000127399.10	LRRC61	1	ENSG00000265778.1		1	0.0890847
Adrenal_Gland	10_81821489_C_T_b37	ENSG00000230091.2	TMEM254-AS1	0.970483	ENSG00000225335.2	XXbac-B476C20.9	1	0.0709162
Adrenal_Gland	16_81118885_T_C_b37	ENSG00000140905.5	GCSH	0.601895	ENSG00000187135.7	VSTM2B	1	0.0431128
Adrenal_Gland	20_43303010_T_C_b37	ENSG00000132832.5	LINC01260;RP11-445H22.3	1	ENSG00000043514.11	TRIT1	0.9886	0.0647783
Adrenal_Gland	7_76210741_A_T_b37	ENSG00000091073.15	DTX2	0.646117	ENSG00000125846.11	ZNF133	0.990502	0.0509227
Adrenal_Gland	4_156858970_G_A_b37	ENSG00000061918.8	GUCY1B3	0.988359	ENSG00000010319.2	SEMA3G	1	0.0534757
Adrenal_Gland	12_13225007_C_T_b37	ENSG00000084444.9	FAM234B;KIAA1467	0.959872	ENSG00000259536.1	RP11-111A22.1	1	0.0917901
Adrenal_Gland	22_37633350_A_G_b37	ENSG00000133466.9	C1QTNF6	0.947956	ENSG00000272077.1		1	0.080607
Adrenal_Gland	4_8511223_A_G_b37	ENSG00000087008.11	ACOX3	1	ENSG00000256690.1	RP11-727F15.9	1	0.00302241
Adrenal_Gland	17_8771747_C_T_b37	ENSG00000133026.8	MYH10	0.997109	ENSG00000136026.9	CKAP4	0.989918	0.00796126
Adrenal_Gland	16_75387564_A_G_b37	ENSG00000153774.4	CFDP1	0.999115	ENSG00000092850.7	TEKT2	0.98578	0.0410966
Adrenal_Gland	6_32646184_C_A_b37	ENSG00000204344.10	STK19	0.833052	ENSG00000165972.8	CCDC38	0.956335	0.0280265
Adrenal_Gland	6_10842660_G_A_b37	ENSG00000153157.8	SYCP2L	0.98747	ENSG00000097021.15	ACOT7	0.975854	0.0622696
Adrenal_Gland	7_152156146_G_A_b37	ENSG00000261455.1	LINC01003	1	ENSG00000169902.9	TPST1	0.985684	0.0306543
Adrenal_Gland	10_52358285_G_A_b37	ENSG00000231345.3	BEND3P1;RP11-564C4.6	0.681571	ENSG00000230952.1		1	0.09793
Adrenal_Gland	1_75209312_A_G_b37	ENSG00000116791.9	CRYZ	0.997024	ENSG00000214485.5	CTB-13H5.1;RPL7P1	0.21712	0.0823735
Adrenal_Gland	3_41175824_C_T_b37	ENSG00000234287.1	RP11-761N21.2	0.158482	ENSG00000242477.1	CTD-2161E19.1	0.786106	1.70754e-07
Adrenal_Gland	2_223344694_C_A_b37	ENSG00000163082.9	SGPP2	0.939908	ENSG00000174374.9	WBSCR16	0.570849	0.0373377
Adrenal_Gland	8_71962485_T_C_b37	ENSG00000246366.2	LACTB2-AS1;RP11-382J12.1	0.928565	ENSG00000124019.9	FAM124B	0.977238	0.0245106
Adrenal_Gland	17_29104706_GTTAATATAT_G_b37	ENSG00000264538.2	SUZ12P;SUZ12P1	0.743444	ENSG00000113638.8	TTC33	1	0.0295621
Adrenal_Gland	7_30614508_A_G_b37	ENSG00000196295.7	AC005154.6	0.974692	ENSG00000139549.2	DHH	1	0.0279396
Adrenal_Gland	19_48020417_C_T_b37	ENSG00000118156.8	ZNF541	1	ENSG00000255980.1		1	0.0150891
Adrenal_Gland	16_89255047_T_C_b37	ENSG00000260259.1	RP11-368I7.4	0.909351	ENSG00000272909.1	CTD-2555O16.4	0.801089	0.0600507
Adrenal_Gland	1_35995798_G_A_b37	ENSG00000054116.7	TRAPPC3	0.992831	ENSG00000223466.1	AC064834.2	1	0.00273796
Adrenal_Gland	10_96064168_C_A_b37	ENSG00000173145.7	NOC3L	1	ENSG00000065361.10	ERBB3	0.953984	0.0613768
Adrenal_Gland	6_34799221_T_A_b37	ENSG00000065060.12	UHRF1BP1	0.975119	ENSG00000244134.1	RPS12P20	1	0.0415565
Adrenal_Gland	14_102897009_A_G_b37	ENSG00000100865.10	CINP	0.844648	ENSG00000259687.1	LINC01220;RP11-293M10.5	0.999018	0.0475343
Adrenal_Gland	1_86924983_T_C_b37	ENSG00000137975.7	CLCA2	0.998569	ENSG00000166352.11	C11orf74	0.903908	0.0914567
Adrenal_Gland	2_9285990_G_C_b37	ENSG00000171848.9	RRM2	0.84409	ENSG00000183856.6	IQGAP3	0.994842	0
Adrenal_Gland	7_72251134_A_G_b37	ENSG00000254184.3	TYW1B	0.580517	ENSG00000132915.6	PDE6A	0.889137	0.0773581
Adrenal_Gland	2_9285990_G_C_b37	ENSG00000171848.9	RRM2	0.84409	ENSG00000135451.8	TROAP	0.951551	0
Adrenal_Gland	6_32793523_G_A_b37	ENSG00000204267.9	TAP2	0.995605	ENSG00000105483.12	CARD8	0.955549	0.0207032
Adrenal_Gland	1_15790974_A_G_b37	ENSG00000142615.7	CELA2A	0.858449	ENSG00000132330.12	SCLY	0.983039	0.0212491
Adrenal_Gland	19_2100331_A_G_b37	ENSG00000065000.11	AP3D1	1	ENSG00000213250.5	RBMS2P1	0.84592	0.0761343
Adrenal_Gland	15_82546946_T_G_b37	ENSG00000255769.3	GOLGA2P10;RP11-152F13.3	0.175728	ENSG00000133069.10	TMCC2	1	0.0133703
Adrenal_Gland	3_119433573_T_C_b37	ENSG00000183833.12	MAATS1	0.997705	ENSG00000007516.9	BAIAP3	1	0.0984485
Artery_Aorta	3_39448804_G_A_b37	ENSG00000168028.9	RPSA	0.787579	ENSG00000183298.4	RPSAP19	0.153558	0
Artery_Aorta	10_51566879_G_A_b37	ENSG00000174194.11	AGAP8	0.183724	ENSG00000188234.9	AGAP4	0.111497	0.0224865
Artery_Aorta	17_44824213_T_G_b37	ENSG00000262539.1	RP11-259G18.3	0.477597	ENSG00000204650.9	CRHR1-IT1	0.935777	0.0167837
Artery_Aorta	17_44824213_T_G_b37	ENSG00000214401.4	KANSL1-AS1	1	ENSG00000204650.9	CRHR1-IT1	0.935777	0.022163
Artery_Aorta	19_8399628_A_G_b37	ENSG00000233927.4	RPS28	0.949371	ENSG00000237039.1	AC018738.2	0.285539	0
Artery_Aorta	19_8399628_A_G_b37	ENSG00000233927.4	RPS28	0.949371	ENSG00000227097.4	RPS28P7	0.340555	0.0127116
Artery_Aorta	5_149808764_C_G_b37	ENSG00000164587.7	RPS14	0.956229	ENSG00000224114.1		0.864438	0.0282424
Artery_Aorta	17_44824213_T_G_b37	ENSG00000214401.4	KANSL1-AS1	1	ENSG00000214425.2	LRRC37A4P	0.346458	0.0346376
Artery_Aorta	17_18523289_C_T_b37	ENSG00000220161.4	RP1-37N7.3	0.53545	ENSG00000188933.10	USP32P1	0.359227	0.00600503
Artery_Aorta	16_89629780_G_A_b37	ENSG00000167526.9	RPL13	0.888324	ENSG00000215030.4	RPL13P12	0.743772	0
Artery_Aorta	10_51807214_G_A_b37	ENSG00000099290.11	FAM21A	0.306151	ENSG00000152726.14		0.283338	0.0034659
Artery_Aorta	11_8010307_T_G_b37	ENSG00000175390.8	EIF3F	0.908951	ENSG00000233426.2	EIF3FP3	0.718878	0
Artery_Aorta	19_39926601_C_T_b37	ENSG00000105193.4	RPS16	0.939419	ENSG00000178715.7	RP11-169K16.8	0.895045	0.0364199
Artery_Aorta	14_36194086_A_G_b37	ENSG00000174373.11	RALGAPA1	0.736465	ENSG00000229419.1	RALGAPA1P	0.721176	0
Artery_Aorta	5_177266026_G_A_b37	ENSG00000170089.11	RP11-423H2.1	0.566867	ENSG00000051596.5	THOC3	0.506533	0.0109113
Artery_Aorta	1_245025692_A_T_b37	ENSG00000203667.5	COX20	0.926911	ENSG00000213025.2	COX20P1	0.772085	0.00153302
Artery_Aorta	6_32154285_A_G_b37	ENSG00000204305.9	AGER	1	ENSG00000253570.1	RNF5P1	0.803648	0.00347119
Artery_Aorta	17_44824213_T_G_b37	ENSG00000262539.1	RP11-259G18.3	0.477597	ENSG00000263503.1	RP11-707O23.5	0.493324	0.00842824
Artery_Aorta	17_44853924_G_A_b37	ENSG00000108379.5	WNT3	0.997901	ENSG00000204650.9	CRHR1-IT1	0.935777	0.0523159
Artery_Aorta	17_44824213_T_G_b37	ENSG00000262539.1	RP11-259G18.3	0.477597	ENSG00000264070.1	DND1P1	0.488832	0.00283356
Artery_Aorta	17_44824213_T_G_b37	ENSG00000214401.4	KANSL1-AS1	1	ENSG00000264070.1	DND1P1	0.488832	0.0045281
Artery_Aorta	7_128281256_G_A_b37	ENSG00000271529.1	CICP14	0.138156	ENSG00000234419.1	CICP13	0.21686	0
Artery_Aorta	7_128281256_G_A_b37	ENSG00000230715.2	RP11-274B21.4	0.292784	ENSG00000234419.1	CICP13	0.21686	0.0235912
Artery_Aorta	7_128281256_G_A_b37	ENSG00000243679.1	RP11-274B21.3	0.345899	ENSG00000234419.1	CICP13	0.21686	0.0916931
Artery_Aorta	7_128281256_G_A_b37	ENSG00000243302.3	RP11-274B21.2	0.160049	ENSG00000234419.1	CICP13	0.21686	7.44635e-07
Artery_Aorta	6_26604140_T_C_b37	ENSG00000233631.2	RP11-457M11.2	0.503836	ENSG00000188801.8	ZNF322P1	0.514348	0.00726184
Artery_Aorta	16_16298288_G_T_b37	ENSG00000227827.3	RP11-958N24.2	0.279822	ENSG00000254681.2	PKD1P5	0.280036	8.72111e-07
Artery_Aorta	3_39448804_G_A_b37	ENSG00000168028.9	RPSA	0.787579	ENSG00000237506.2	RPSAP15	0.210452	0
Artery_Aorta	17_44852612_A_C_b37	ENSG00000120071.8	KANSL1	0.979025	ENSG00000265218.1		0.303974	1.40633e-06
Artery_Aorta	5_79960128_G_T_b37	ENSG00000228716.2	DHFR	0.516943	ENSG00000188985.5	DHFRP1	0.554804	0
Artery_Aorta	6_153333883_C_T_b37	ENSG00000112031.11	MTRF1L	0.545717	ENSG00000180015.11	RP11-756P10.3	0.666511	3.75981e-10
Artery_Aorta	6_33239869_C_T_b37	ENSG00000231500.2	RPS18	0.870495	ENSG00000242299.1		0.523809	0
Artery_Aorta	6_153308198_T_G_b37	ENSG00000227627.1	RP1-101K10.6	0.496835	ENSG00000180015.11	RP11-756P10.3	0.666511	1.29552e-05
Artery_Aorta	6_26652703_A_G_b37	ENSG00000181315.6	ZNF322	0.526872	ENSG00000188801.8	ZNF322P1	0.514348	0.00223191
Artery_Aorta	16_16298288_G_T_b37	ENSG00000227827.3	RP11-958N24.2	0.279822	ENSG00000214940.4	NPIPA8	0.167763	0
Artery_Aorta	16_16297168_C_T_b37	ENSG00000183793.9	NPIPA5	0.0908081	ENSG00000254681.2	PKD1P5	0.280036	4.43531e-06
Artery_Aorta	17_44121579_T_C_b37	ENSG00000266918.1	RP11-798G7.8	0.210367	ENSG00000265218.1		0.303974	0.000137821
Artery_Aorta	16_16298288_G_T_b37	ENSG00000227827.3	RP11-958N24.2	0.279822	ENSG00000205746.5		0.185107	1.74183e-11
Artery_Aorta	17_18319610_T_TG_b37	ENSG00000154874.10	CCDC144B	0.353022	ENSG00000188933.10	USP32P1	0.359227	1.0782e-10
Artery_Aorta	16_16296488_G_A_b37	ENSG00000183889.8	AC138969.4	0.146547	ENSG00000205746.5		0.185107	0.025415
Artery_Aorta	16_16296488_G_A_b37	ENSG00000244257.4	PKD1P1	0.186338	ENSG00000205746.5		0.185107	0.0557146
Artery_Aorta	2_114425685_G_T_b37	ENSG00000236397.2	DDX11L2	0.190286	ENSG00000184319.11	AC002055.4;RPL23AP82	0.167017	0.00629927
Artery_Aorta	15_30951076_T_G_b37	ENSG00000261794.1	GOLGA8H	0.149533	ENSG00000175344.12	CHRNA7	0.52755	6.30424e-10
Artery_Aorta	15_30964572_G_A_b37	ENSG00000166664.9	CHRFAM7A	0.419253	ENSG00000175344.12	CHRNA7	0.52755	0
Artery_Aorta	15_30943789_T_C_b37	ENSG00000263070.1	RP11-382B18.3	0.231538	ENSG00000175344.12	CHRNA7	0.52755	0
Artery_Aorta	5_69291044_A_G_b37	ENSG00000197822.6	OCLN	0.46568	ENSG00000230847.4	RP11-195E2.1	0.5	0
Artery_Aorta	7_128281256_G_A_b37	ENSG00000230715.2	RP11-274B21.4	0.292784	ENSG00000253326.2	RP11-261C10.7	0.34244	1.89143e-08
Artery_Aorta	7_128281256_G_A_b37	ENSG00000243679.1	RP11-274B21.3	0.345899	ENSG00000253326.2	RP11-261C10.7	0.34244	1.10711e-12
Artery_Aorta	7_128281256_G_A_b37	ENSG00000243302.3	RP11-274B21.2	0.160049	ENSG00000253326.2	RP11-261C10.7	0.34244	2.88999e-06
Artery_Aorta	17_15686346_C_G_b37	ENSG00000265519.1	CTD-3157E16.1	0.578838	ENSG00000188013.5	MEIS3P2	0.580837	0.000157837
Artery_Aorta	15_84853852_C_G_b37	ENSG00000259570.1	RP11-671M22.4	0.438667	ENSG00000259243.1	RP13-996F3.4	0.091176	0.0880557
Artery_Aorta	17_15689515_G_C_b37	ENSG00000179277.9	MEIS3P1	0.541101	ENSG00000188013.5	MEIS3P2	0.580837	5.74805e-09
Artery_Aorta	16_16297168_C_T_b37	ENSG00000183793.9	NPIPA5	0.0908081	ENSG00000214940.4	NPIPA8	0.167763	0.00102695
Artery_Aorta	10_51570152_G_A_b37	ENSG00000204169.6	AGAP7	0.106438	ENSG00000204150.7	CTGLF11P	0.114664	0.0948126
Artery_Aorta	1_121371136_C_G_b37	ENSG00000188610.8	FAM72B	0.318831	ENSG00000122497.13	NBPF14	0.0907645	0.0878363
Artery_Aorta	7_128342209_T_C_b37	ENSG00000242588.2	RP11-274B21.1	0.265695	ENSG00000234419.1	CICP13	0.21686	1.23718e-08
Artery_Aorta	7_128342209_T_C_b37	ENSG00000242588.2	RP11-274B21.1	0.265695	ENSG00000233771.2	CICP5	0.159844	3.79343e-07
Artery_Aorta	5_70679626_G_A_b37	ENSG00000230847.4	RP11-195E2.1	0.5	ENSG00000197822.6	OCLN	0.46568	0
Artery_Aorta	16_16297168_C_T_b37	ENSG00000183793.9	NPIPA5	0.0908081	ENSG00000205746.5		0.185107	3.88953e-06
Artery_Aorta	9_130226909_T_C_b37	ENSG00000196152.6	ZNF79	1	ENSG00000204196.4	RPL12P16	0.192137	0.0347242
Artery_Aorta	9_130230514_A_G_b37	ENSG00000197958.8	RPL12	0.905365	ENSG00000204196.4	RPL12P16	0.192137	0
Artery_Aorta	2_114425685_G_T_b37	ENSG00000236397.2	DDX11L2	0.190286	ENSG00000228463.4		0.131866	0.09691
Artery_Aorta	17_18263957_G_C_b37	ENSG00000176974.13	SHMT1	0.927828	ENSG00000188933.10	USP32P1	0.359227	0.026765
Artery_Aorta	16_16298288_G_T_b37	ENSG00000227827.3	RP11-958N24.2	0.279822	ENSG00000260447.1	RP11-304L19.2	0.278706	3.9114e-09
Artery_Aorta	7_128281256_G_A_b37	ENSG00000271529.1	CICP14	0.138156	ENSG00000233771.2	CICP5	0.159844	4.97498e-11
Artery_Aorta	7_128281256_G_A_b37	ENSG00000230715.2	RP11-274B21.4	0.292784	ENSG00000233771.2	CICP5	0.159844	0.0179502
Artery_Aorta	7_128281256_G_A_b37	ENSG00000243302.3	RP11-274B21.2	0.160049	ENSG00000233771.2	CICP5	0.159844	5.10131e-05
Artery_Aorta	5_70675730_A_G_b37	ENSG00000226259.6	GTF2H2B	0.336043	ENSG00000253203.2	GUSBP3	0.135636	1.63763e-07
Artery_Aorta	5_70679720_G_A_b37	ENSG00000254353.1	RP11-195E2.4	0.375074	ENSG00000253203.2	GUSBP3	0.135636	0.00205772
Artery_Aorta	9_130230514_A_G_b37	ENSG00000197958.8	RPL12	0.905365	ENSG00000185834.9	RPL12P4	0.310301	0
Artery_Aorta	2_132278419_G_A_b37	ENSG00000173272.9	MZT2A	0.674522	ENSG00000227632.2	AC018804.6	0.564576	0.0635129
Artery_Aorta	7_128281256_G_A_b37	ENSG00000271529.1	CICP14	0.138156	ENSG00000214837.4	LINC01347	0.203684	0.000835022
Artery_Aorta	7_128281256_G_A_b37	ENSG00000243302.3	RP11-274B21.2	0.160049	ENSG00000214837.4	LINC01347	0.203684	0.0196877
Artery_Aorta	5_70679720_G_A_b37	ENSG00000254353.1	RP11-195E2.4	0.375074	ENSG00000197822.6	OCLN	0.46568	3.12716e-08
Artery_Aorta	6_33546837_T_C_b37	ENSG00000030110.8	BAK1	0.515117	ENSG00000175730.7	BAK1P1	0.62236	3.89613e-07
Artery_Aorta	5_70308251_C_T_b37	ENSG00000172058.11	SERF1A	0.415646	ENSG00000250138.3	RP11-848G14.5	0.0738226	0.0757659
Artery_Aorta	5_70308251_C_T_b37	ENSG00000237075.4	RP11-497H16.2	0.10067	ENSG00000250138.3	RP11-848G14.5	0.0738226	2.22045e-16
Artery_Aorta	4_104020422_T_C_b37	ENSG00000164039.10	BDH2	0.9046	ENSG00000232699.2	BDH2P1	0.909639	1.56846e-05
Artery_Aorta	16_69975631_A_T_b37	ENSG00000157322.12	CLEC18A	0.354378	ENSG00000196436.7	NPIPB15	0.280708	0.00783378
Artery_Aorta	17_44852612_A_C_b37	ENSG00000120071.8	KANSL1	0.979025	ENSG00000266918.1	RP11-798G7.8	0.210367	0.0102285
Artery_Aorta	9_130226909_T_C_b37	ENSG00000196152.6	ZNF79	1	ENSG00000185834.9	RPL12P4	0.310301	0.0384318
Artery_Aorta	5_70675730_A_G_b37	ENSG00000226259.6	GTF2H2B	0.336043	ENSG00000197822.6	OCLN	0.46568	8.82824e-07
Artery_Aorta	15_30979829_C_A_b37	ENSG00000178081.8	ULK4P3	0.293875	ENSG00000175344.12	CHRNA7	0.52755	1.40694e-09
Artery_Aorta	1_226258009_C_T_b37	ENSG00000163041.5	H3F3A	0.803323	ENSG00000235655.2	H3F3AP4	0.276503	0.0690335
Artery_Aorta	7_128281256_G_A_b37	ENSG00000271529.1	CICP14	0.138156	ENSG00000233003.3	CICP26	0.146907	0.000763847
Artery_Aorta	7_128281256_G_A_b37	ENSG00000230715.2	RP11-274B21.4	0.292784	ENSG00000233003.3	CICP26	0.146907	0.0267625
Artery_Aorta	7_128281256_G_A_b37	ENSG00000243679.1	RP11-274B21.3	0.345899	ENSG00000233003.3	CICP26	0.146907	0.0462935
Artery_Aorta	7_128342209_T_C_b37	ENSG00000242588.2	RP11-274B21.1	0.265695	ENSG00000253326.2	RP11-261C10.7	0.34244	0.0169365
Artery_Aorta	5_69291044_A_G_b37	ENSG00000197822.6	OCLN	0.46568	ENSG00000254353.1	RP11-195E2.4	0.375074	6.10869e-11
Artery_Aorta	16_16297168_C_T_b37	ENSG00000183793.9	NPIPA5	0.0908081	ENSG00000260447.1	RP11-304L19.2	0.278706	0.00327886
Artery_Aorta	12_21604616_C_CTTCTCA_b37	ENSG00000121350.11	PYROXD1	0.625754	ENSG00000213252.3	RP11-819M15.1	0.810877	9.42078e-09
Artery_Aorta	16_70503967_C_G_b37	ENSG00000189091.8	SF3B3	0.935202	ENSG00000196436.7	NPIPB15	0.280708	0.0110163
Artery_Aorta	10_116084088_T_C_b37	ENSG00000169129.10	AFAP1L2	0.99979	ENSG00000198873.10	GRK5	0.998676	1.30198e-06
Artery_Aorta	16_2013756_T_C_b37	ENSG00000255513.1	AC005363.9	0.98556	ENSG00000235508.2	RPS2P7	0.323832	0.0128347
Artery_Aorta	15_83667973_C_G_b37	ENSG00000169612.3	FAM103A1	0.628793	ENSG00000235272.1	FAM103A2P	0.617262	0.000115842
Artery_Aorta	2_242850012_C_T_b37	ENSG00000220804.4	AC093642.5	0.221346	ENSG00000260923.1	AC137934.1	0.173336	9.00742e-05
Artery_Aorta	2_211106791_T_TA_b37	ENSG00000144445.11	KANSL1L	0.980033	ENSG00000260938.1		0.895349	0.038311
Artery_Aorta	7_75147801_T_C_b37	ENSG00000205583.9	STAG3L1	0.349529	ENSG00000174353.13	STAG3L3	0.33377	3.47062e-08
Artery_Aorta	5_70675730_A_G_b37	ENSG00000226259.6	GTF2H2B	0.336043	ENSG00000250138.3	RP11-848G14.5	0.0738226	0.000634747
Artery_Aorta	19_17072044_G_A_b37	ENSG00000160111.8	CPAMD8	0.930356	ENSG00000197320.4	AC060834.2	0.769523	0
Artery_Aorta	12_53296852_A_G_b37	ENSG00000170421.7	KRT8	0.808936	ENSG00000254285.2	KRT8P3	0.549888	0
Artery_Aorta	1_226258009_C_T_b37	ENSG00000163041.5	H3F3A	0.803323	ENSG00000250966.2	RP11-402J6.3	0.303536	2.64876e-07
Artery_Aorta	16_2013756_T_C_b37	ENSG00000255513.1	AC005363.9	0.98556	ENSG00000240342.2	RPS2P5	0.15602	0.000256209
Artery_Aorta	12_53296852_A_G_b37	ENSG00000170421.7	KRT8	0.808936	ENSG00000224520.2	KRT8P45	0.729482	3.94795e-13
Artery_Aorta	15_30782780_T_C_b37	ENSG00000260128.2	ULK4P2	0.299724	ENSG00000175344.12	CHRNA7	0.52755	2.19342e-06
Artery_Aorta	5_70304645_AAG_A_b37	ENSG00000253816.2	RP11-1415C14.3	0.101078	ENSG00000250138.3	RP11-848G14.5	0.0738226	0.0058414
Artery_Aorta	3_69832851_T_G_b37	ENSG00000187098.10	MITF	0.999601	ENSG00000272853.1		1	0.0948908
Artery_Aorta	5_70568209_G_A_b37	ENSG00000250918.2	RP11-497H16.4	0.0892776	ENSG00000253203.2	GUSBP3	0.135636	0.00660032
Artery_Aorta	5_68828803_T_A_b37	ENSG00000183474.11	GTF2H2C	0.310848	ENSG00000254353.1	RP11-195E2.4	0.375074	6.40155e-13
Artery_Aorta	6_32284108_T_G_b37	ENSG00000244731.3	C4A	0.506796	ENSG00000204525.10	HLA-C	0.790104	0.00336643
Artery_Aorta	11_64012910_A_G_b37	ENSG00000173457.6	PPP1R14B	0.741295	ENSG00000179967.11	PPP1R14BP3	0.64124	0
Artery_Aorta	16_81109181_T_C_b37	ENSG00000140905.5	GCSH	0.601895	ENSG00000224837.1	GCSHP5	0.565588	5.94775e-08
Artery_Aorta	12_42361106_C_T_b37	ENSG00000165966.10	PDZRN4	0.998839	ENSG00000180573.8	HIST1H2AC	0.995903	0.0862421
Artery_Aorta	15_85109718_G_C_b37	ENSG00000225151.6	AC103965.1;GOLGA2P7	0.215019	ENSG00000259472.1	RP13-996F3.3	0.175624	0.0021852
Artery_Aorta	5_70308251_C_T_b37	ENSG00000172058.11	SERF1A	0.415646	ENSG00000197822.6	OCLN	0.46568	0.0971659
Artery_Aorta	5_81571266_GA_G_b37	ENSG00000186468.8	RPS23	0.912925	ENSG00000230629.2	RPS23P8	0.739583	0
Artery_Aorta	7_128342209_T_C_b37	ENSG00000242588.2	RP11-274B21.1	0.265695	ENSG00000228882.1	CICP9	0.269736	0.00524356
Artery_Aorta	5_70308251_C_T_b37	ENSG00000172058.11	SERF1A	0.415646	ENSG00000253203.2	GUSBP3	0.135636	0.0175898
Artery_Aorta	5_70308251_C_T_b37	ENSG00000237075.4	RP11-497H16.2	0.10067	ENSG00000253203.2	GUSBP3	0.135636	0.00013142
Artery_Aorta	5_179741374_C_A_b37	ENSG00000050748.13	MAPK9	0.984472	ENSG00000107036.7	KIAA1432;RIC1	1	0.00656747
Artery_Aorta	6_46185484_A_C_b37	ENSG00000001561.6	ENPP4	1	ENSG00000214711.5	CAPN14	0.992967	0.0402222
Artery_Aorta	3_9404924_G_C_b37	ENSG00000134077.11	THUMPD3	0.955082	ENSG00000163349.17	HIPK1	1	0.0767258
Artery_Aorta	5_70304645_AAG_A_b37	ENSG00000253816.2	RP11-1415C14.3	0.101078	ENSG00000253203.2	GUSBP3	0.135636	0.0701055
Artery_Aorta	4_68556488_T_TAAAAC_b37	ENSG00000248049.2	UBA6-AS1	0.910784	ENSG00000158286.8	RNF207	0.906336	0.0978006
Artery_Aorta	11_34911691_C_T_b37	ENSG00000149089.8	APIP	0.907903	ENSG00000225531.1	RP11-196I18.3	0.871756	0.018958
Artery_Aorta	19_49944281_C_T_b37	ENSG00000126458.3	RRAS	1	ENSG00000236861.2	AC006378.2	0.998127	0.0450756
Artery_Aorta	17_44662558_G_C_b37	ENSG00000260075.1	NSFP1	0.5	ENSG00000265218.1		0.303974	0.0168424
Artery_Aorta	17_44662558_G_C_b37	ENSG00000260075.1	NSFP1	0.5	ENSG00000266918.1	RP11-798G7.8	0.210367	0.00920752
Artery_Aorta	5_6605532_C_A_b37	ENSG00000037474.10	NSUN2	0.955399	ENSG00000175582.15	RAB6A	0.678141	9.40892e-05
Artery_Aorta	19_6753769_G_A_b37	ENSG00000269680.1	CTD-3128G10.6	1	ENSG00000110987.4	BCL7A	0.919535	0.00320053
Artery_Aorta	10_42436443_A_G_b37	ENSG00000196693.10	ZNF33B	0.822705	ENSG00000272983.1	RP11-508N22.12	0.972773	0.00481818
Artery_Aorta	2_3484500_T_C_b37	ENSG00000225234.1	TRAPPC12-AS1	1	ENSG00000265072.1	MIR3652	1	0.0736093
Artery_Aorta	1_201160137_A_G_b37	ENSG00000170075.8	GPR37L1	0.947168	ENSG00000184144.5	CNTN2	0.999932	0.000831911
Artery_Aorta	16_2986323_T_C_b37	ENSG00000059122.12	FLYWCH1	0.967778	ENSG00000177427.8	MIEF2	0.90156	0.00133157
Artery_Aorta	7_128342209_T_C_b37	ENSG00000242588.2	RP11-274B21.1	0.265695	ENSG00000233003.3	CICP26	0.146907	0.00280134
Artery_Aorta	7_64284502_C_T_b37	ENSG00000182722.5	SEPHS1P1	0.839253	ENSG00000137815.10	RTF1	0.961829	0.0626032
Artery_Aorta	10_34642644_TAAA_T_b37	ENSG00000148498.11	PARD3	1	ENSG00000068028.13	RASSF1	1	0.000378701
Artery_Aorta	22_42399547_T_A_b37	ENSG00000183066.10	WBP2NL	0.964653	ENSG00000269402.1	AC116407.2	0.748695	0.0558931
Artery_Aorta	10_64552934_A_G_b37	ENSG00000181915.3	ADO	1	ENSG00000258559.2	AC005519.4	0.895078	0.0258365
Artery_Aorta	1_25893243_G_A_b37	ENSG00000157978.7	LDLRAP1	0.998243	ENSG00000245667.2	RP5-940J5.8	0.766886	0.000337487
Artery_Aorta	10_81340554_G_A_b37	ENSG00000224886.2	BEND3P3	0.612981	ENSG00000231345.3	BEND3P1;RP11-564C4.6	0.681571	3.36398e-13
Artery_Aorta	3_58477280_T_C_b37	ENSG00000272360.1	RP11-359I18.5	1	ENSG00000203761.4	MSTO2P	0.609668	0.054567
Artery_Aorta	7_22854006_C_T_b37	ENSG00000196683.6	TOMM7	0.931482	ENSG00000143753.8	DEGS1	0.871924	0.0762951
Artery_Aorta	4_88286409_C_T_b37	ENSG00000198189.6	HSD17B11	0.982005	ENSG00000148450.8	MSRB2	0.943912	0.0849144
Artery_Aorta	8_74011963_A_G_b37	ENSG00000164764.10	SBSPON	0.939821	ENSG00000214289.2	RPL39P5	0.81077	0.00115783
Artery_Aorta	1_47760263_G_A_b37	ENSG00000162368.9	CMPK1	0.960297	ENSG00000204899.5	MZT1	0.904991	0.0408318
Artery_Aorta	7_32765703_C_T_b37	ENSG00000237004.3	ZNRF2P1	0.895664	ENSG00000232434.1	C9orf172	0.93723	1.05244e-07
Artery_Aorta	4_48190905_T_C_b37	ENSG00000135605.8	TEC	0.990878	ENSG00000213722.4	DDAH2	1	0.0507198
Artery_Aorta	5_82224568_C_T_b37	ENSG00000152422.11	XRCC4	1	ENSG00000141469.12	SLC14A1	0.957101	8.72523e-10
Artery_Aorta	19_46978569_A_G_b37	ENSG00000169515.5	CCDC8	0.969952	ENSG00000100796.13	PPP4R3A	0.999749	0.0566563
Artery_Aorta	2_114425685_G_T_b37	ENSG00000236397.2	DDX11L2	0.190286	ENSG00000241670.2	AP006222.1;RPL23AP21	0.170062	0.0458399
Artery_Aorta	8_56961837_G_A_b37	ENSG00000008988.5	RPS20	0.789479	ENSG00000241685.4	ARPC1A	0.779684	0.000154351
Artery_Aorta	5_70568209_G_A_b37	ENSG00000250918.2	RP11-497H16.4	0.0892776	ENSG00000183474.11	GTF2H2C	0.310848	0.0295348
Artery_Aorta	16_2014424_C_G_b37	ENSG00000255198.3	SNHG9	1	ENSG00000240342.2	RPS2P5	0.15602	0.00733462
Artery_Aorta	7_128281256_G_A_b37	ENSG00000243679.1	RP11-274B21.3	0.345899	ENSG00000228882.1	CICP9	0.269736	0.067711
Artery_Aorta	7_128281256_G_A_b37	ENSG00000243302.3	RP11-274B21.2	0.160049	ENSG00000228882.1	CICP9	0.269736	0.000450909
Artery_Aorta	1_2134072_T_G_b37	ENSG00000228594.1	C1orf233	1	ENSG00000243708.4	PLA2G4B	0.965022	0.0349229
Artery_Aorta	15_85091287_T_C_b37	ENSG00000189136.4	UBE2Q2P1	0.629364	ENSG00000254374.2	GOLGA6L10	0.176344	0.0327161
Artery_Aorta	19_818751_T_C_b37	ENSG00000011304.12	PTBP1	0.998756	ENSG00000148362.6	C9orf142	1	0.00240661
Artery_Aorta	8_11644751_A_G_b37	ENSG00000154328.11	NEIL2	0.946627	ENSG00000099800.3	TIMM13	0.997578	0.0882714
Artery_Aorta	5_70904459_G_C_b37	ENSG00000261269.1	RP11-389C8.2	1	ENSG00000272636.1	DOC2B	0.991705	3.79086e-05
Artery_Aorta	2_160880547_GC_G_b37	ENSG00000153246.7	PLA2R1	0.969417	ENSG00000182853.7	VMO1	1	0.000520613
Artery_Aorta	16_2710913_G_C_b37	ENSG00000205918.5	PDPK2;PDPK2P	0.5	ENSG00000183479.8	TREX2	1	0.088343
Artery_Aorta	2_219705133_T_C_b37	ENSG00000115592.7	PRKAG3	1	ENSG00000110619.12	CARS	0.934364	0.00894685
Artery_Aorta	5_68828803_T_A_b37	ENSG00000183474.11	GTF2H2C	0.310848	ENSG00000145736.10	GTF2H2	0.319057	0
Artery_Aorta	15_85091287_T_C_b37	ENSG00000189136.4	UBE2Q2P1	0.629364	ENSG00000259243.1	RP13-996F3.4	0.091176	0.0545286
Artery_Aorta	17_2852641_G_A_b37	ENSG00000262903.1	RP11-235E17.6	1	ENSG00000130175.5	PRKCSH	0.934898	0.055627
Artery_Aorta	1_161008535_C_G_b37	ENSG00000215845.6	TSTD1	1	ENSG00000152990.9	ADGRA3;GPR125	0.939933	0.0212739
Artery_Aorta	17_11958671_T_C_b37	ENSG00000065559.10	MAP2K4	0.783868	ENSG00000149289.6	ZC3H12C	0.996867	0.0913891
Artery_Aorta	1_893719_G_A_b37	ENSG00000188976.6	NOC2L	0.867798	ENSG00000264433.1	RP11-720L2.3	0.95001	0.0445293
Artery_Aorta	4_68520619_T_G_b37	ENSG00000109163.6	GNRHR	1	ENSG00000158286.8	RNF207	0.906336	0.0374602
Artery_Aorta	15_79160167_C_T_b37	ENSG00000136378.10	ADAMTS7	0.702365	ENSG00000242337.1	TFP1	1	9.84427e-05
Artery_Aorta	11_8613949_A_G_b37	ENSG00000130413.11	STK33	0.957317	ENSG00000151576.6	QTRTD1	0.916834	0.013271
Artery_Aorta	8_67265567_C_CT_b37	ENSG00000147576.11	ADHFE1	1	ENSG00000111671.5	SPSB2	0.995666	0.0427246
Artery_Aorta	8_101946380_C_CTT_b37	ENSG00000164924.13	YWHAZ	0.711409	ENSG00000229932.2	YWHAZP3	0.549223	3.16455e-08
Artery_Aorta	2_20328519_CAT_C_b37	ENSG00000115884.6	SDC1	1	ENSG00000164151.7	ICE1;KIAA0947	0.997608	0.00334984
Artery_Aorta	6_28411220_T_G_b37	ENSG00000187987.5	ZSCAN23	0.9954	ENSG00000196793.9	ZNF239	1	0.0208626
Artery_Aorta	9_140488671_G_A_b37	ENSG00000165724.5	ZMYND19	0.999637	ENSG00000065427.10	KARS	0.95557	0.027833
Artery_Aorta	14_21539684_C_T_b37	ENSG00000165801.5	ARHGEF40	1	ENSG00000091436.12	MLTK	0.959597	0.000820467
Artery_Aorta	3_176297340_GT_G_b37	ENSG00000273193.1	RP11-523G9.3	1	ENSG00000101447.9	FAM83D	0.968136	0.00406724
Artery_Aorta	7_154790174_T_C_b37	ENSG00000273344.1	PAXIP1-AS1	0.988308	ENSG00000212802.3	RPL15P3	0.383277	0.00336136
Artery_Aorta	7_66218847_T_C_b37	ENSG00000226824.2	RP4-756H11.3	1	ENSG00000251254.1	GTF2F2P1	1	0.0313373
Artery_Aorta	1_2299912_T_C_b37	ENSG00000178642.5	AL513477.1	0.978473	ENSG00000258449.1	RP11-713N11.4	1	0.0442706
Artery_Aorta	7_23145295_T_G_b37	ENSG00000122550.13	KLHL7	0.91862	ENSG00000119402.12	FBXW2	0.955647	2.84414e-05
Artery_Aorta	5_95782639_T_C_b37	ENSG00000113441.11	LNPEP	0.98567	ENSG00000139636.11	LMBR1L	0.999366	0.00515091
Artery_Aorta	11_57326927_C_T_b37	ENSG00000134809.4	TIMM10	0.965659	ENSG00000182566.8	CLEC4G	0.979021	0.0665034
Artery_Aorta	17_46033854_C_A_b37	ENSG00000264019.1	RP11-6N17.6	0.957577	ENSG00000198113.2	TOR4A	0.941684	0.0122917
Artery_Aorta	6_107501419_T_C_b37	ENSG00000164494.7	PDSS2	0.930633	ENSG00000264514.1	RP11-720L2.4	1	0.0675606
Artery_Aorta	1_228472669_C_A_b37	ENSG00000181218.4	HIST3H2A	0.988285	ENSG00000180902.12	D2HGDH	0.981285	0.00304835
Artery_Aorta	22_23547827_T_G_b37	ENSG00000099991.12	CABIN1	1	ENSG00000013392.6	RWDD2A	0.967718	0.00147607
Artery_Aorta	16_69975631_A_T_b37	ENSG00000157322.12	CLEC18A	0.354378	ENSG00000140839.7	CLEC18B	0.38105	0
Artery_Aorta	5_80589998_T_G_b37	ENSG00000247572.3	CKMT2-AS1	0.937096	ENSG00000233416.1		1	0.0112036
Artery_Aorta	6_13700719_AGTAG_A_b37	ENSG00000010017.9	RANBP9	1	ENSG00000160219.7	GAB3	1	0.0169575
Artery_Aorta	14_21253550_C_T_b37	ENSG00000258810.1	RP11-219E7.1	1	ENSG00000114784.3	EIF1B	0.979241	0.0551872
Artery_Aorta	15_83663099_TTTTA_T_b37	ENSG00000169609.9	C15orf40	0.872424	ENSG00000260467.1	RP11-405F3.4	1	0.012312
Artery_Aorta	21_37535657_AG_A_b37	ENSG00000236830.2	CBR3-AS1	0.938979	ENSG00000235655.2	H3F3AP4	0.276503	0.00718485
Artery_Aorta	3_16494983_A_G_b37	ENSG00000131378.9	RFTN1	0.996992	ENSG00000106591.3	MRPL32	0.961567	2.04924e-05
Artery_Aorta	22_39516515_T_C_b37	ENSG00000226024.1	COX5BP7	1	ENSG00000181220.11	ZNF746	0.915971	0.00991583
Artery_Aorta	16_1401845_C_G_b37	ENSG00000007520.3	TSR3	1	ENSG00000148120.10	C9orf3	0.981011	0.0091947
Artery_Aorta	15_32913030_G_C_b37	ENSG00000262728.1	AC123768.4	0.436909	ENSG00000163001.7	CFAP36	0.932503	0.0346437
Artery_Aorta	10_51566879_G_A_b37	ENSG00000174194.11	AGAP8	0.183724	ENSG00000204150.7	CTGLF11P	0.114664	0.0398623
Artery_Aorta	5_80793199_C_G_b37	ENSG00000145687.11	SSBP2	0.902411	ENSG00000230872.1		1	0.057153
Artery_Aorta	19_46239598_C_T_b37	ENSG00000185800.7	DMWD	0.960459	ENSG00000235652.3	RP11-545I5.3	0.914644	0.0706751
Artery_Aorta	12_15041938_T_G_b37	ENSG00000182993.3	C12orf60	0.97071	ENSG00000154358.15	OBSCN	0.965075	0.0584464
Artery_Aorta	20_1419199_T_A_b37	ENSG00000088833.13	NSFL1C	0.972288	ENSG00000058404.15	CAMK2B	0.997546	0.0274284
Artery_Aorta	13_74624612_A_G_b37	ENSG00000118922.12	KLF12	0.999976	ENSG00000126215.9	XRCC3	0.968309	0.0695435
Artery_Aorta	2_6940217_T_C_b37	ENSG00000205837.3	LINC00487	1	ENSG00000140968.6	IRF8	1	0.0107531
Artery_Aorta	21_37535657_AG_A_b37	ENSG00000236830.2	CBR3-AS1	0.938979	ENSG00000239523.1	MYLK-AS1	1	0.0242393
Artery_Aorta	1_177983497_GGTTGT_G_b37	ENSG00000242193.5	RP11-568K15.1	0.842291	ENSG00000203880.7	PCMTD2	0.841489	0.00463628
Artery_Aorta	17_12895984_G_C_b37	ENSG00000006744.14	ELAC2	0.986262	ENSG00000234418.1		1	0.0201126
Artery_Aorta	21_44502816_A_G_b37	ENSG00000160200.13	CBS	0.998759	ENSG00000077238.9	IL4R	0.992927	0.0549461
Artery_Aorta	19_13871411_A_T_b37	ENSG00000267633.1	CTB-5E10.3	0.980717	ENSG00000116863.10	ADPRHL2	1	0.00198314
Artery_Aorta	19_13871411_A_T_b37	ENSG00000037757.9	MRI1	0.782847	ENSG00000116863.10	ADPRHL2	1	0.0571279
Artery_Aorta	1_43435650_G_A_b37	ENSG00000227533.1	SLC2A1-AS1	0.992718	ENSG00000235295.1	XXbac-B476C20.17	0.965645	0.0666222
Artery_Aorta	1_201085521_C_T_b37	ENSG00000232237.2	ASCL5	1	ENSG00000134775.11	FHOD3	0.999868	0.0347196
Artery_Aorta	10_45923528_C_A_b37	ENSG00000188234.9	AGAP4	0.111497	ENSG00000174194.11	AGAP8	0.183724	2.86978e-10
Artery_Aorta	7_98407251_T_G_b37	ENSG00000106236.3	NPTX2	1	ENSG00000049089.9	COL9A2	1	0.000139671
Artery_Aorta	7_77045957_A_G_b37	ENSG00000186088.11	GSAP	1	ENSG00000232495.2	AC069287.1	1	0.0435178
Artery_Aorta	5_70903577_C_T_b37	ENSG00000145734.14	BDP1	0.944456	ENSG00000164535.10	DAGLB	0.952498	0.000616583
Artery_Aorta	22_19857207_C_T_b37	ENSG00000184470.15	TXNRD2	0.9536	ENSG00000270135.1	RP11-362K14.7	1	0.0219956
Artery_Aorta	6_97338598_A_T_b37	ENSG00000123545.5	NDUFAF4	0.834033	ENSG00000168434.8	COG7	0.973991	0.04017
Artery_Aorta	12_53381811_G_A_b37	ENSG00000063046.13	EIF4B	0.564691	ENSG00000197258.5	EIF4BP6	0.477527	0
Artery_Aorta	22_20140234_GC_G_b37	ENSG00000234409.4	AC006547.14;CCDC188	0.948508	ENSG00000179899.7	PHC1P1	0.621859	0.0543851
Artery_Aorta	15_85203704_G_C_b37	ENSG00000166716.5	ZNF592	0.906076	ENSG00000166073.4	GPR176	1	0.0994897
Artery_Aorta	1_231366685_G_A_b37	ENSG00000135775.9	COG2	1	ENSG00000166949.11	SMAD3	1	0.0289108
Artery_Aorta	19_18047283_T_G_b37	ENSG00000007080.6	CCDC124	0.941453	ENSG00000149547.10	EI24	0.804454	0.000265513
Artery_Aorta	17_18044270_T_C_b37	ENSG00000091536.12	MYO15A	0.971379	ENSG00000188933.10	USP32P1	0.359227	0.0615893
Artery_Aorta	1_150174366_G_A_b37	ENSG00000143434.11	SEMA6C	1	ENSG00000100478.10	AP4S1	0.920212	0.0360647
Artery_Aorta	2_75408094_C_T_b37	ENSG00000065911.7	MTHFD2	0.788716	ENSG00000125977.6	EIF2S2	0.836244	2.16955e-09
Artery_Aorta	8_144346382_T_G_b37	ENSG00000253716.1	LINC01604;MINCR;RP13-582O9.5	1	ENSG00000111737.7	RAB35	0.999644	0.00144512
Artery_Aorta	17_78865491_C_G_b37	ENSG00000176108.5	CHMP6	1	ENSG00000133105.3	RXFP2	1	0.0518387
Artery_Aorta	2_191832492_T_C_b37	ENSG00000235852.1	AC005540.3	1	ENSG00000258471.1	RP11-84C10.4	1	0.00201919
Artery_Aorta	8_74011963_A_G_b37	ENSG00000164764.10	SBSPON	0.939821	ENSG00000114019.10	AMOTL2	1	0.000480677
Artery_Aorta	5_70904459_G_C_b37	ENSG00000261269.1	RP11-389C8.2	1	ENSG00000257607.1	RP11-449P15.1	1	1.35181e-09
Artery_Aorta	5_171861761_T_C_b37	ENSG00000072786.8	STK10	0.954511	ENSG00000180673.9	EXOC5P1	0.865435	3.90732e-06
Artery_Aorta	6_3158460_TG_T_b37	ENSG00000137285.9	TUBB2B	0.741771	ENSG00000107175.6	CREB3	1	0.0209331
Artery_Aorta	5_96004363_T_C_b37	ENSG00000249180.1	CTC-506B8.1	1	ENSG00000219201.3		0.420829	0.00110903
Artery_Aorta	2_105676175_C_A_b37	ENSG00000135972.4	MRPS9	1	ENSG00000116005.7	PCYOX1	0.887639	0.092923
Artery_Aorta	17_78251696_C_T_b37	ENSG00000263069.1	CTD-2047H16.4	0.989489	ENSG00000128908.11	INO80	1	0.0843877
Artery_Aorta	9_21317985_G_A_b37	ENSG00000226393.1	IFNA20P	1	ENSG00000174599.4	TRAM1L1	1	0.0760207
Artery_Aorta	13_52432169_A_C_b37	ENSG00000102796.6	DHRS12	0.99835	ENSG00000141577.9	AZI1;CEP131	1	0.0376665
Artery_Aorta	9_17284013_TTTTG_T_b37	ENSG00000044459.10	CNTLN	0.969201	ENSG00000272181.1	RP11-245J9.6	1	0.00528419
Artery_Aorta	1_121226982_G_T_b37	ENSG00000223345.3	HIST2H2BA	0.301192	ENSG00000215861.4	WI2-1896O14.1	0.5	0.067881
Artery_Aorta	17_42980189_G_A_b37	ENSG00000108883.8	EFTUD2	0.997445	ENSG00000239521.3	GATS	0.940687	0.0798662
Artery_Aorta	2_219312463_G_GT_b37	ENSG00000135913.6	USP37	0.956508	ENSG00000101955.10	SRPX	1	0.00664001
Artery_Aorta	2_27315064_G_A_b37	ENSG00000138030.8	KHK	1	ENSG00000169964.5	TMEM42	1	0.0496034
Artery_Aorta	5_70904459_G_C_b37	ENSG00000261269.1	RP11-389C8.2	1	ENSG00000126895.9	AVPR2	0.999558	0
Artery_Aorta	12_42361106_C_T_b37	ENSG00000165966.10	PDZRN4	0.998839	ENSG00000138041.11	SMEK2	0.845604	0.00611276
Artery_Aorta	7_30796273_T_C_b37	ENSG00000241644.2	INMT	0.797147	ENSG00000243335.4	KCTD7	0.94929	0.0668318
Artery_Aorta	17_41032784_C_CA_b37	ENSG00000260105.2	AOC4P	0.790021	ENSG00000135205.10	CCDC146	0.958035	0.0766692
Artery_Aorta	17_78865491_C_G_b37	ENSG00000176108.5	CHMP6	1	ENSG00000239959.1	ENPP7P2	0.592325	0.055392
Artery_Aorta	12_93717719_T_C_b37	ENSG00000258171.1	RP11-511B23.3	1	ENSG00000180581.6	SRP9P1	0.638718	0.0865708
Artery_Aorta	8_143751698_T_C_b37	ENSG00000167653.4	PSCA	0.996741	ENSG00000130764.5	LRRC47	0.91065	0.0385051
Artery_Aorta	19_36403667_T_C_b37	ENSG00000105290.7	APLP1	0.922107	ENSG00000187097.8	ENTPD5	0.975426	0.0142011
Artery_Aorta	18_29726951_G_C_b37	ENSG00000134758.9	RNF138	0.853516	ENSG00000094880.6	CDC23	0.98914	0.091211
Artery_Aorta	20_43589041_G_A_b37	ENSG00000025772.7	TOMM34	1	ENSG00000256612.3	CYP2B7P;CYP2B7P1	0.856999	0.014296
Artery_Aorta	10_6016211_C_T_b37	ENSG00000134470.15	IL15RA	0.988367	ENSG00000116497.13	S100PBP	0.95435	0.0602406
Artery_Aorta	18_10555135_C_A_b37	ENSG00000134265.8	NAPG	0.96393	ENSG00000165113.8	GKAP1	0.89303	0.081073
Artery_Aorta	9_116026040_C_T_b37	ENSG00000136868.9	SLC31A1	0.740498	ENSG00000077264.10	PAK3	0.972545	0.0201341
Artery_Aorta	2_202410395_G_C_b37	ENSG00000234842.1	AC007163.8	1	ENSG00000100325.10	ASCC2	0.999318	0.0804874
Artery_Aorta	12_110089412_C_A_b37	ENSG00000111199.6	TRPV4	0.999437	ENSG00000138246.11	DNAJC13	0.998692	0.0695531
Artery_Aorta	4_186109662_C_A_b37	ENSG00000164323.8	CFAP97;KIAA1430	0.944697	ENSG00000179988.9	PSTK	0.981916	0.0888911
Artery_Aorta	6_29910473_G_A_b37	ENSG00000235290.1	HLA-W	0.984621	ENSG00000070495.10	JMJD6	0.957596	0.0839359
Artery_Aorta	12_51205763_C_T_b37	ENSG00000123268.4	ATF1	0.984885	ENSG00000155093.13	PTPRN2	1	0.019327
Artery_Aorta	13_32891451_CAAGT_C_b37	ENSG00000083642.14	PDS5B	0.999041	ENSG00000143514.12	TP53BP2	0.985966	0.0643633
Artery_Aorta	12_89681405_A_ACT_b37	ENSG00000271259.1	RP11-1109F11.5	1	ENSG00000184922.9	FMNL1	0.994807	0.097371
Artery_Aorta	7_150371_AG_A_b37	ENSG00000261795.1	RP11-90P13.1	1	ENSG00000131386.13	GALNT15	0.950827	0.015071
Artery_Aorta	19_3587977_G_A_b37	ENSG00000179855.5	GIPC3	0.916269	ENSG00000239665.4	RP11-295P9.3	0.994848	0.0319343
Artery_Aorta	5_139605202_C_T_b37	ENSG00000113068.5	PFDN1	0.766592	ENSG00000244619.2	RP11-315I20.3	1	0.077663
Artery_Aorta	16_88766359_C_T_b37	ENSG00000260630.2	SNAI3-AS1	1	ENSG00000138629.11	UBL7	1	0.00395614
Artery_Aorta	4_726322_G_A_b37	ENSG00000233799.1	AC139887.4	1	ENSG00000106927.7	AMBP	1	0.0491928
Artery_Aorta	17_48275180_AT_A_b37	ENSG00000251179.1	RP11-893F2.9;TMEM92-AS1	1	ENSG00000162460.6	TMEM82	1	0.00867889
Artery_Aorta	11_71146691_A_G_b37	ENSG00000241233.1	KRTAP5-8	0.679702	ENSG00000163393.8	SLC22A15	1	0.0485709
Artery_Aorta	20_35893690_C_T_b37	ENSG00000166619.8	BLCAP	0.990595	ENSG00000102893.11	PHKB	0.971785	0.0626554
Artery_Aorta	14_50609126_C_G_b37	ENSG00000100483.9	VCPKMT	0.877492	ENSG00000171475.9	WIPF2	0.932901	0.0691925
Artery_Aorta	17_4904376_T_A_b37	ENSG00000108509.16	CAMTA2	1	ENSG00000090020.6	SLC9A1	0.973559	0.0113286
Artery_Aorta	10_38754790_A_T_b37	ENSG00000075407.13	ZNF37A	0.813257	ENSG00000258725.1	PRC1-AS1	1	0.0985065
Artery_Aorta	9_139243226_C_T_b37	ENSG00000213221.4	DNLZ	1	ENSG00000100867.10	DHRS2	0.962494	0.0906868
Artery_Aorta	7_76838343_C_T_b37	ENSG00000127951.5	FGL2	0.928648	ENSG00000151892.10	GFRA1	0.996236	0.0657978
Artery_Aorta	8_12803918_C_T_b37	ENSG00000251468.2	RP11-369K16.1	1	ENSG00000226235.1	LEMD1-AS1	0.929028	0.0170358
Artery_Aorta	16_50774733_A_G_b37	ENSG00000260929.1	RP11-327F22.1	1	ENSG00000243679.1	RP11-274B21.3	0.345899	0.0923667
Artery_Aorta	15_63449865_G_T_b37	ENSG00000185088.8	RPS27L	0.905956	ENSG00000110344.5	UBE4A	0.956721	0.000312033
Artery_Aorta	20_57330863_T_G_b37	ENSG00000268649.2	MIR296	1	ENSG00000268442.1	HAVCR1P1	0.976578	0.0171823
Artery_Aorta	1_46598903_A_G_b37	ENSG00000159596.6	TMEM69	0.874432	ENSG00000172458.4	IL17D	1	0.0969846
Artery_Aorta	5_95995733_G_T_b37	ENSG00000153113.19	CAST	0.990625	ENSG00000219201.3		0.420829	0.00068623
Artery_Aorta	9_116541510_AAGTTATTTAACTTCATT_A_b37	ENSG00000106948.12	AKNA	0.898979	ENSG00000120709.6	FAM53C	0.970157	0.000340168
Artery_Aorta	2_135709945_G_GA_b37	ENSG00000082258.8	CCNT2	0.99518	ENSG00000268149.1	CTD-3193O13.13	1	0.0940728
Artery_Aorta	11_124960284_A_C_b37	ENSG00000203306.3	AP001007.1	0.676198	ENSG00000218281.1	HIST1H2APS3	1	0.0813539
Artery_Aorta	19_10214499_G_A_b37	ENSG00000267105.1	CTD-2369P2.4	1	ENSG00000198081.6	ZBTB14	0.996728	0.0246659
Artery_Aorta	6_32284108_T_G_b37	ENSG00000244731.3	C4A	0.506796	ENSG00000272864.1	RP11-17E13.2	1	0.00762349
Artery_Aorta	1_109831124_C_T_b37	ENSG00000162650.11	ATXN7L2	1	ENSG00000014216.11	CAPN1	0.997926	0.012421
Artery_Aorta	20_10281370_G_A_b37	ENSG00000132639.8	SNAP25	0.999667	ENSG00000230751.1	AC007036.4	0.982724	0.0978814
Artery_Aorta	20_10281370_G_A_b37	ENSG00000227906.3	SNAP25-AS1	1	ENSG00000230751.1	AC007036.4	0.982724	0.0645853
Artery_Aorta	1_183583993_A_G_b37	ENSG00000162704.11	ARPC5	0.918299	ENSG00000251411.1	RP11-397E7.4	0.970721	0.00397473
Artery_Aorta	1_48215379_A_G_b37	ENSG00000225028.1	RP11-330M19.1	1	ENSG00000188290.6	HES4	1	0.0800771
Artery_Aorta	8_134593927_C_T_b37	ENSG00000008513.10	ST3GAL1	0.935274	ENSG00000260261.1	RP11-480A16.1	0.461148	0.0244877
Artery_Aorta	11_59533416_A_G_b37	ENSG00000166900.10	STX3	0.980564	ENSG00000175893.7	ZDHHC21	0.992448	0.097539
Artery_Aorta	5_49903911_G_A_b37	ENSG00000170571.7	EMB	0.719887	ENSG00000172061.7	LRRC15	0.992216	0.0591962
Artery_Aorta	8_104332333_A_AG_b37	ENSG00000247081.3	BAALC-AS1;RP11-318M2.2	0.982981	ENSG00000120798.12	NR2C1	0.979926	0.0548203
Artery_Aorta	8_104332333_A_AG_b37	ENSG00000164930.7	FZD6	1	ENSG00000120798.12	NR2C1	0.979926	2.68485e-05
Artery_Aorta	11_44140674_T_TTTTATA_b37	ENSG00000255165.1	CTD-2609K8.3	0.730903	ENSG00000200320.1	SNORA63	1	0.0477946
Artery_Aorta	16_50805888_A_G_b37	ENSG00000261644.1	RP11-327F22.2	1	ENSG00000243679.1	RP11-274B21.3	0.345899	0.00311227
Artery_Aorta	3_196433653_CCTT_C_b37	ENSG00000174007.7	CEP19	0.877519	ENSG00000078596.6	ITM2A	0.999654	0.0292849
Artery_Aorta	19_38893856_G_C_b37	ENSG00000171817.12	ZNF540	0.954462	ENSG00000107623.4	GDF10	1	0.0224826
Artery_Aorta	1_155907823_T_A_b37	ENSG00000143622.6	RIT1	0.970652	ENSG00000132613.10	MTSS1L	1	0.0492977
Artery_Aorta	5_69298253_TA_T_b37	ENSG00000134058.6	CDK7	0.873414	ENSG00000203837.4	PNLIPRP3	0.999674	0.000157399
Artery_Aorta	11_93984750_C_T_b37	ENSG00000250519.2	RP11-680H20.2	0.920194	ENSG00000161243.4	FBXO27	0.851368	0.00968692
Artery_Aorta	1_25816658_CATA_C_b37	ENSG00000224183.1	SDHDP6	0.34532	ENSG00000162735.14	PEX19	1	0.05714
Artery_Aorta	15_99553162_C_A_b37	ENSG00000183571.9	PGPEP1L	0.921926	ENSG00000141338.9	ABCA8	0.972439	0.00771004
Artery_Aorta	10_102024258_C_T_b37	ENSG00000230224.1	PHBP9	0.971593	ENSG00000267708.1		0.866915	0.0682442
Artery_Aorta	1_3786612_C_T_b37	ENSG00000130764.5	LRRC47	0.91065	ENSG00000214176.5	PLEKHM1P	0.719415	0.0486815
Artery_Aorta	4_77054615_C_T_b37	ENSG00000138750.10	NUP54	1	ENSG00000180539.4	C9orf139	0.963547	0.0186822
Artery_Aorta	19_1026477_G_T_b37	ENSG00000064666.10	CNN2	0.826815	ENSG00000218018.2	RP4-800J21.3	1	0.00883143
Artery_Aorta	2_215690359_C_G_b37	ENSG00000138376.6	BARD1	0.999953	ENSG00000273004.1		1	0.091249
Artery_Aorta	9_139312972_G_T_b37	ENSG00000165689.12	SDCCAG3	0.88501	ENSG00000119203.9	CPSF3	1	0.0525686
Artery_Aorta	10_18239619_A_G_b37	ENSG00000183748.4	MRC1L1	0.505425	ENSG00000183439.5	TRIM61	0.637793	0.0340662
Artery_Aorta	5_74047436_G_A_b37	ENSG00000164346.5	NSA2	0.777344	ENSG00000155428.8	TRIM74	0.411025	0.0954156
Artery_Aorta	6_58276930_G_A_b37	ENSG00000215190.4	LINC00680	0.480188	ENSG00000215158.5	RP11-1023L17.1	0.321421	0.0255753
Artery_Aorta	17_78251696_C_T_b37	ENSG00000263069.1	CTD-2047H16.4	0.989489	ENSG00000110717.6	NDUFS8	0.95911	0.0661131
Artery_Aorta	17_78251696_C_T_b37	ENSG00000173821.15	RNF213	0.932281	ENSG00000110717.6	NDUFS8	0.95911	0.0051835
Artery_Aorta	4_47895929_CAGTGATCAGAAAT_C_b37	ENSG00000259959.1	RP11-121C2.2	1	ENSG00000213398.3	LCAT	0.978807	0.0277261
Artery_Aorta	16_3589024_AC_A_b37	ENSG00000167984.12	NLRC3	0.918814	ENSG00000224032.2	EPB41L4A-AS1	1	0.00621023
Artery_Aorta	11_124675214_A_G_b37	ENSG00000245498.2	RP11-677M14.7	0.996928	ENSG00000103326.6	CAPN15	0.969914	0.030643
Artery_Aorta	1_41745035_C_T_b37	ENSG00000235358.1	RP11-399E6.1	1	ENSG00000228201.1	AL022341.3	1	0.0352962
Artery_Aorta	19_39424653_T_C_b37	ENSG00000269486.1	CTC-360G5.9	0.650947	ENSG00000232220.2	AC008440.5	1	0.000118586
Artery_Aorta	15_42400578_G_C_b37	ENSG00000159459.7	UBR1	0.980952	ENSG00000067141.12	NEO1	0.989956	0.0974323
Artery_Aorta	15_95701247_C_T_b37	ENSG00000248441.2	CTD-2536I1.1;LINC01197	1	ENSG00000101160.9	CTSZ	1	0.0423556
Artery_Aorta	15_53457141_C_T_b37	ENSG00000197535.10	MYO5A	0.980698	ENSG00000261377.1	PDCD6IPP2;RP11-578F21.12	0.467701	0.0691572
Artery_Aorta	14_100233480_A_G_b37	ENSG00000066629.12	EML1	0.985433	ENSG00000204022.5	LIPJ	0.997765	0.0108497
Artery_Aorta	8_144967300_G_A_b37	ENSG00000213563.2	C8orf82	1	ENSG00000169991.6	IFFO2	0.997019	2.91336e-06
Artery_Aorta	9_136223366_G_A_b37	ENSG00000148296.5	SURF6	0.99398	ENSG00000178921.9	PFAS	0.963656	0.00301171
Artery_Aorta	11_75806513_C_T_b37	ENSG00000158636.12	C11orf30	0.992948	ENSG00000198832.6	SELM	0.998671	0.00190891
Artery_Aorta	19_53947818_G_A_b37	ENSG00000241015.2	TPM3P9	0.756861	ENSG00000261026.1		1	0.025479
Artery_Aorta	14_106210814_T_C_b37	ENSG00000211893.3	IGHG2	0.331214	ENSG00000211651.2	IGLV1-44	0.622436	0
Artery_Aorta	1_33835555_G_A_b37	ENSG00000184389.8	A3GALT2	1	ENSG00000136206.3	SPDYE1	0.236622	0.0331659
Artery_Aorta	2_27636474_A_G_b37	ENSG00000234072.1	AC074117.10	0.569141	ENSG00000273247.1	RP11-83A24.2	0.936093	0.0659057
Artery_Aorta	3_112905717_C_T_b37	ENSG00000144857.10	BOC	0.998819	ENSG00000268525.1	CTB-59C6.3	1	0.0992674
Artery_Aorta	3_140958061_T_C_b37	ENSG00000155893.7	ACPL2;PXYLP1	0.978994	ENSG00000111799.16	COL12A1	1	5.87257e-05
Artery_Aorta	10_16555528_A_T_b37	ENSG00000165985.8	C1QL3	1	ENSG00000119950.16	MXI1	0.999864	0.0159062
Artery_Aorta	2_170120742_C_T_b37	ENSG00000152253.4	SPC25	0.595163	ENSG00000186193.7	SAPCD2	0.786293	2.80878e-10
Artery_Aorta	20_256727_T_A_b37	ENSG00000196476.7	C20orf96	0.98538	ENSG00000144233.5	AMMECR1L	0.942018	0.055917
Artery_Aorta	17_4914028_C_T_b37	ENSG00000262429.1	RP5-1050D4.3	1	ENSG00000090020.6	SLC9A1	0.973559	0.0051722
Artery_Aorta	10_48318619_C_T_b37	ENSG00000198035.9	AGAP9	0.129192	ENSG00000254929.2	RP11-144G6.12	0.201819	4.46339e-05
Artery_Aorta	14_20805564_A_G_b37	ENSG00000100814.13	CCNB1IP1	0.849008	ENSG00000175768.8	TOMM5	0.977478	0.0196742
Artery_Aorta	19_46978569_A_G_b37	ENSG00000169515.5	CCDC8	0.969952	ENSG00000105669.8	COPE	1	4.45826e-05
Artery_Aorta	5_96136525_T_C_b37	ENSG00000248734.2	CTD-2260A17.1	1	ENSG00000197272.2	IL27	1	0.00635461
Artery_Aorta	1_224160778_T_C_b37	ENSG00000272645.1	RP11-504P24.8	0.248121	ENSG00000047188.11	YTHDC2	0.992592	0.0875505
Artery_Aorta	3_132435823_C_T_b37	ENSG00000248724.2	NPHP3-AS1	1	ENSG00000226361.4	TERF1P5	0.479017	0.0211331
Artery_Aorta	1_185660036_C_G_b37	ENSG00000143341.7	HMCN1	1	ENSG00000207501.1	RNVU1-14	1	0.0498235
Artery_Aorta	3_124399293_A_G_b37	ENSG00000260391.2	RP11-71H17.7	1	ENSG00000145020.10	AMT	0.984699	0.0469119
Artery_Aorta	1_62771019_G_A_b37	ENSG00000132854.14	KANK4	0.999722	ENSG00000227217.1	RP11-367J7.3	1	0.00220647
Artery_Aorta	21_47607088_G_A_b37	ENSG00000223901.1	AP001469.5	1	ENSG00000230077.1	MTAPP2	0.968338	0.0183143
Artery_Aorta	6_30898441_A_G_b37	ENSG00000137411.12	VARS2	0.973015	ENSG00000186188.6	FFAR4	0.935472	0.065091
Artery_Aorta	16_69364443_A_G_b37	ENSG00000258429.1	PDF	0.986081	ENSG00000103174.7	NAGPA	0.989346	0.0171842
Artery_Aorta	19_19925148_T_C_b37	ENSG00000266904.1	LINC00663	0.985801	ENSG00000231351.2	AC111200.7	0.443929	0.0663451
Artery_Aorta	19_12685484_T_C_b37	ENSG00000269242.1	CTD-2192J16.22	0.87819	ENSG00000139926.11	FRMD6	0.992401	0.0128439
Artery_Aorta	20_30458612_C_T_b37	ENSG00000149599.11	DUSP15	1	ENSG00000165694.5	FRMD7	0.989285	0.0189272
Artery_Aorta	9_139312972_G_T_b37	ENSG00000165689.12	SDCCAG3	0.88501	ENSG00000176903.3	PNMA1	1	0.0814819
Artery_Aorta	12_72691079_C_T_b37	ENSG00000072657.4	TRHDE	0.996671	ENSG00000005889.11	ZFX	0.912555	0.0587965
Artery_Aorta	20_1419199_T_A_b37	ENSG00000088833.13	NSFL1C	0.972288	ENSG00000272661.1	RP4-548D19.3	1	0.0669316
Artery_Aorta	13_111299813_G_A_b37	ENSG00000134905.12	CARS2	0.98765	ENSG00000147202.13	DIAPH2	0.981492	0.050292
Artery_Aorta	16_327699_A_G_b37	ENSG00000185615.11	PDIA2	1	ENSG00000261770.1	CTC-459F4.1	0.97184	0.0388396
Artery_Aorta	9_35002131_C_G_b37	ENSG00000221829.5	FANCG	1	ENSG00000165175.11	MID1IP1	1	0.0303406
Artery_Aorta	9_116111236_A_G_b37	ENSG00000119411.10	BSPRY	0.968154	ENSG00000260105.2	AOC4P	0.790021	0.00086923
Artery_Aorta	9_8858303_C_G_b37	ENSG00000225706.1	PTPRD-AS1;RP11-75C9.1	0.982374	ENSG00000146670.5	CDCA5	1	0.00569997
Artery_Aorta	11_82972298_G_A_b37	ENSG00000137500.5	CCDC90B	0.902365	ENSG00000100813.10	ACIN1	0.997678	0.00744529
Artery_Aorta	9_131884802_C_T_b37	ENSG00000119383.15	PPP2R4	0.974272	ENSG00000250320.1	CTD-2269F5.1	1	0.0626861
Artery_Aorta	5_96122814_A_C_b37	ENSG00000164307.8	ERAP1	0.992485	ENSG00000116604.13	MEF2D	0.998467	0.00944208
Artery_Aorta	16_66390553_C_T_b37	ENSG00000125149.7	C16orf70	0.974862	ENSG00000158301.14	GPRASP2	0.936366	0.095419
Artery_Aorta	15_84686759_G_A_b37	ENSG00000156222.7	SLC28A1	0.997848	ENSG00000135093.8	USP30	0.978038	0.0367815
Artery_Aorta	16_1308834_C_T_b37	ENSG00000127586.12	CHTF18	1	ENSG00000116704.6	SLC35D1	0.963958	0.0316397
Artery_Aorta	7_2267442_C_G_b37	ENSG00000122687.13	FTSJ2	0.971698	ENSG00000198821.6	CD247	0.933195	0.01526
Artery_Aorta	15_40672145_C_T_b37	ENSG00000140323.4	DISP2	0.997096	ENSG00000125149.7	C16orf70	0.974862	0.0762433
Artery_Aorta	10_97538233_A_AAAAGC_b37	ENSG00000119977.16	TCTN3	1	ENSG00000267755.1	AC004623.2	1	0.0850725
Artery_Aorta	16_19042255_A_G_b37	ENSG00000170537.8	TMC7	0.876837	ENSG00000208024.1	MIR199A2	1	0.0694346
Artery_Aorta	5_139605202_C_T_b37	ENSG00000113068.5	PFDN1	0.766592	ENSG00000143127.8	ITGA10	0.986672	0.0854974
Artery_Aorta	18_12972899_CA_C_b37	ENSG00000085415.11	SEH1L	0.966291	ENSG00000215386.6	LINC00478;MIR99AHG	0.994894	0.096777
Artery_Aorta	4_535767_A_AATAT_b37	ENSG00000174227.11	PIGG	0.998315	ENSG00000127578.6	WFIKKN1	0.987457	0.0958569
Artery_Aorta	9_86214614_A_G_b37	ENSG00000172159.11	FRMD3	0.996463	ENSG00000272267.1	RP11-375N15.2	1	0.0952937
Artery_Aorta	1_27453337_C_T_b37	ENSG00000186501.10	TMEM222	1	ENSG00000184497.8	TMEM255B	1	0.0478321
Artery_Aorta	6_1529372_C_T_b37	ENSG00000272279.1	RP11-157J24.2	1	ENSG00000164880.11	INTS1	0.99929	0.0141171
Artery_Aorta	1_25807095_T_C_b37	ENSG00000204178.5	TMEM57	1	ENSG00000160688.14	FLAD1	0.923339	0.0380298
Artery_Aorta	7_32531328_C_T_b37	ENSG00000273014.1	RP11-225B17.2	0.692755	ENSG00000089639.6	GMIP	1	0.0679811
Artery_Aorta	17_77773318_T_C_b37	ENSG00000141570.6	CBX8	1	ENSG00000184677.12	ZBTB40	0.984829	0.0956345
Artery_Aorta	19_2248683_C_T_b37	ENSG00000104899.4	AMH	1	ENSG00000134330.14	IAH1	0.955792	0.0106257
Artery_Aorta	4_186109662_C_A_b37	ENSG00000164323.8	CFAP97;KIAA1430	0.944697	ENSG00000145439.7	CBR4	0.981049	0.000490386
Artery_Aorta	17_79974731_T_C_b37	ENSG00000169750.4	RAC3	0.995624	ENSG00000100109.12	TFIP11	0.971223	0.0504564
Artery_Aorta	11_76368054_C_G_b37	ENSG00000254810.1	RP11-672A2.4	1	ENSG00000001630.11	CYP51A1	0.59648	0.0251575
Artery_Aorta	19_12160263_G_A_b37	ENSG00000219665.4	CTD-2006C1.2	0.734029	ENSG00000165752.12	STK32C	1	0.00643898
Artery_Aorta	10_19414196_CTCTT_C_b37	ENSG00000120594.12	PLXDC2	0.974471	ENSG00000206417.4	H1FX-AS1	0.928567	0.0291073
Artery_Aorta	9_26895808_A_G_b37	ENSG00000096872.11	IFT74	0.965907	ENSG00000185924.6	RTN4RL1	0.993483	0.0550526
Artery_Aorta	11_6711738_T_C_b37	ENSG00000255390.1	RP11-732A19.5	1	ENSG00000205002.3	AARD	0.836363	0.0336648
Artery_Aorta	8_144967300_G_A_b37	ENSG00000213563.2	C8orf82	1	ENSG00000228502.1	EEF1A1P11	0.428492	0.0636243
Artery_Aorta	11_75806513_C_T_b37	ENSG00000158636.12	C11orf30	0.992948	ENSG00000116096.5	SPR	0.978298	0.0512734
Artery_Aorta	17_16241544_C_T_b37	ENSG00000166582.5	CENPV	0.998982	ENSG00000015532.5	XYLT2	0.95798	0.0651859
Artery_Aorta	9_139623701_C_T_b37	ENSG00000233016.2	SNHG7	0.955002	ENSG00000197291.4	RAMP2-AS1	0.939955	0.0625643
Artery_Aorta	12_132626668_T_C_b37	ENSG00000256804.1	RP13-977J11.5	1	ENSG00000134684.6	YARS	0.980796	0.0152475
Artery_Aorta	1_26483381_C_T_b37	ENSG00000197245.4	FAM110D	1	ENSG00000164088.13	PPM1M	1	0.0265915
Artery_Aorta	15_55606213_T_C_b37	ENSG00000225973.3	PIGBOS1;RP11-139H15.1	0.926821	ENSG00000126603.4	GLIS2	0.989195	0.00831296
Artery_Aorta	1_42002239_C_T_b37	ENSG00000117016.5	RIMS3	0.999274	ENSG00000183793.9	NPIPA5	0.0908081	0.0577348
Artery_Aorta	7_150371_AG_A_b37	ENSG00000261795.1	RP11-90P13.1	1	ENSG00000255701.1	AC090953.1	1	0.00461569
Artery_Aorta	2_47596853_C_CG_b37	ENSG00000119888.6	EPCAM	0.987404	ENSG00000257941.1		0.984127	0.0965607
Artery_Aorta	12_25306242_G_C_b37	ENSG00000118307.14	CASC1	0.977617	ENSG00000223839.3	FAM95B1	0.227962	0.049684
Artery_Aorta	2_63498049_T_C_b37	ENSG00000143951.11	WDPCP	0.834948	ENSG00000262855.1	RP11-46I8.4	0.741455	0.0575715
Artery_Aorta	5_70904459_G_C_b37	ENSG00000261269.1	RP11-389C8.2	1	ENSG00000164849.7	GPR146	1	9.02331e-10
Artery_Aorta	1_154274135_G_GA_b37	ENSG00000160714.5	UBE2Q1	1	ENSG00000198563.9	DDX39B	0.977297	0.0678057
Artery_Aorta	6_118805933_ACG_A_b37	ENSG00000217330.1	SSXP10	1	ENSG00000234127.4	TRIM26	0.999003	0.00308921
Artery_Aorta	4_134962_GA_G_b37	ENSG00000256143.1	Z95704.5	0.95467	ENSG00000180336.13	C17orf104	0.933681	0.0385964
Artery_Aorta	8_23228405_G_C_b37	ENSG00000134013.11	LOXL2	0.979039	ENSG00000204186.3	ZDBF2	0.973118	0.0192716
Artery_Aorta	10_62039654_G_C_b37	ENSG00000232682.1	RP11-388P9.2	1	ENSG00000109906.9	ZBTB16	0.990598	0.0712067
Artery_Aorta	22_24266954_A_C_b37	ENSG00000218537.1	AP000350.4;MIF-AS1	0.993798	ENSG00000260432.1	RP11-297M9.2	1	0.00639077
Artery_Aorta	5_78286251_T_C_b37	ENSG00000113273.11	ARSB	0.95602	ENSG00000135506.11	OS9	1	8.63522e-08
Artery_Aorta	19_3635980_A_C_b37	ENSG00000105298.9	CACTIN	0.987629	ENSG00000180011.6	ZADH2	0.965819	0.0125409
Artery_Aorta	1_165593606_T_C_b37	ENSG00000143198.8	MGST3	0.976789	ENSG00000166887.11	VPS39	1	0.00606484
Artery_Aorta	7_137345592_C_T_b37	ENSG00000182158.10	CREB3L2	0.97589	ENSG00000149115.9	TNKS1BP1	0.999419	0.00302472
Artery_Aorta	5_70904459_G_C_b37	ENSG00000261269.1	RP11-389C8.2	1	ENSG00000186642.11	PDE2A	0.998406	6.83316e-07
Artery_Aorta	17_2278557_C_T_b37	ENSG00000263345.1	RP1-59D14.5	0.918146	ENSG00000120798.12	NR2C1	0.979926	0.0199093
Artery_Aorta	7_30757811_T_C_b37	ENSG00000106113.14	CRHR2	0.988261	ENSG00000138792.5	ENPEP	0.974145	0.0179412
Artery_Aorta	15_84853852_C_G_b37	ENSG00000259570.1	RP11-671M22.4	0.438667	ENSG00000215749.8	RP13-996F3.5	0.120338	0.0948255
Artery_Aorta	17_41032784_C_CA_b37	ENSG00000260105.2	AOC4P	0.790021	ENSG00000239917.3	RPS10P16	0.580908	0.0082403
Artery_Aorta	8_144115083_G_C_b37	ENSG00000247317.3	RP11-273G15.2	0.997991	ENSG00000226393.1	IFNA20P	1	0.0888934
Artery_Aorta	15_50648368_ATG_A_b37	ENSG00000244879.3	GABPB1-AS1	0.943067	ENSG00000204227.4	RING1	1	0.00613701
Artery_Aorta	19_38771365_TG_T_b37	ENSG00000099341.7	PSMD8	0.928188	ENSG00000185267.5	CDNF	0.973292	0.00555201
Artery_Aorta	1_26661402_G_C_b37	ENSG00000158022.6	TRIM63	0.994204	ENSG00000101470.5	TNNC2	1	2.88658e-15
Artery_Aorta	3_9404924_G_C_b37	ENSG00000134077.11	THUMPD3	0.955082	ENSG00000100888.8	CHD8	1	0.0865598
Artery_Aorta	12_132331532_A_T_b37	ENSG00000198598.2	MMP17	0.993606	ENSG00000164946.15	FREM1	0.998468	0.022522
Artery_Aorta	1_43844602_T_C_b37	ENSG00000066056.9	TIE1	0.960693	ENSG00000248138.1	RP11-446J8.1	1	2.22045e-16
Artery_Aorta	3_2110358_T_G_b37	ENSG00000237990.2	CNTN4-AS1	1	ENSG00000164096.10	C4orf3	0.942959	0.000110681
Artery_Aorta	17_18581060_A_G_b37	ENSG00000240445.3	FOXO3B	0.556634	ENSG00000159885.9	ZNF222	0.952028	0.0202421
Artery_Aorta	9_125027119_A_C_b37	ENSG00000119446.9	RBM18	0.987937	ENSG00000178458.5	H3F3AP6	0.206083	0.00284302
Artery_Aorta	5_60136902_G_A_b37	ENSG00000188725.3	SMIM15	0.924551	ENSG00000204394.8	VARS	1	0.00130224
Artery_Aorta	10_32737271_C_A_b37	ENSG00000150093.14	ITGB1	0.785844	ENSG00000267125.1	CTB-31O20.6	1	0.0155066
Artery_Aorta	2_203412512_A_AC_b37	ENSG00000273456.1	RP11-686O6.2	1	ENSG00000267042.1		1	0.0766147
Artery_Aorta	14_74161003_G_C_b37	ENSG00000176903.3	PNMA1	1	ENSG00000273262.1	RP11-18I14.11	1	0.0378446
Artery_Aorta	17_5019668_C_T_b37	ENSG00000180626.9	ZNF594	0.846706	ENSG00000221866.5	PLXNA4	0.998013	0.00133189
Artery_Aorta	10_81737583_CTCTT_C_b37	ENSG00000133661.11	SFTPD	1	ENSG00000272225.1	RP11-592B15.9	0.261023	0.0489091
Artery_Aorta	1_99147707_G_T_b37	ENSG00000162627.12	SNX7	0.918478	ENSG00000258498.2	DIO3OS	1	0.0573881
Artery_Aorta	21_37535658_G_A_b37	ENSG00000159231.5	CBR3	0.999181	ENSG00000117594.5	HSD11B1	1	0.000297756
Artery_Aorta	22_50946588_C_G_b37	ENSG00000100258.13	LMF2	1	ENSG00000104969.5	SGTA	0.988462	0.000436811
Artery_Aorta	16_74311453_G_A_b37	ENSG00000214331.4	RP11-252A24.2	0.579238	ENSG00000090857.9	PDPR	0.830364	3.2166e-09
Artery_Aorta	7_149561049_C_G_b37	ENSG00000204934.6	ATP6V0E2-AS1	1	ENSG00000260219.1	RP11-347C12.10	1	0.018623
Artery_Aorta	7_24590069_T_A_b37	ENSG00000105926.11	MPP6	0.977257	ENSG00000118689.10	FOXO3	0.57553	0.0011408
Artery_Aorta	18_5253756_T_C_b37	ENSG00000265188.1	RP11-835E18.4	1	ENSG00000235454.1	HAUS6P3;RP11-678B3.2	0.592449	0.00637496
Artery_Aorta	1_155367095_C_T_b37	ENSG00000225855.2	RUSC1-AS1	0.989283	ENSG00000132196.9	HSD17B7	0.552433	7.4809e-12
Artery_Aorta	1_155367095_C_T_b37	ENSG00000160752.10	FDPS	0.950424	ENSG00000132196.9	HSD17B7	0.552433	3.42171e-12
Artery_Aorta	1_17428832_C_T_b37	ENSG00000117115.8	PADI2	0.998729	ENSG00000180720.6	CHRM4	1	0.00390866
Artery_Aorta	12_99112323_A_G_b37	ENSG00000166130.10	IKBIP	0.941885	ENSG00000236565.2	HNRNPA3P5	0.423836	0.0677867
Artery_Aorta	19_17505248_C_T_b37	ENSG00000268650.3	AC068499.10	1	ENSG00000272114.1	RP1-261G23.7	1	0.0390906
Artery_Aorta	11_63574508_C_T_b37	ENSG00000133318.9	RTN3	0.829487	ENSG00000144426.14	NBEAL1	0.948048	0.0370808
Artery_Aorta	17_8918976_T_C_b37	ENSG00000198844.6	ARHGEF15	0.955823	ENSG00000134294.9	SLC38A2	0.999899	0.0239657
Artery_Aorta	15_28283441_A_G_b37	ENSG00000261377.1	PDCD6IPP2;RP11-578F21.12	0.467701	ENSG00000140990.10	NDUFB10	0.980494	0.0748434
Artery_Aorta	6_12670504_T_C_b37	ENSG00000212802.3	RPL15P3	0.383277	ENSG00000272606.1	RP11-554J4.1	1	0.068696
Artery_Aorta	15_99553162_C_A_b37	ENSG00000183571.9	PGPEP1L	0.921926	ENSG00000177764.6		0.990225	0.0284701
Artery_Aorta	2_75408094_C_T_b37	ENSG00000065911.7	MTHFD2	0.788716	ENSG00000167522.10	ANKRD11	0.873746	7.43314e-05
Artery_Aorta	11_77701861_T_A_b37	ENSG00000149262.12	INTS4	0.72289	ENSG00000164669.8	INTS4L1;INTS4P1	0.755898	0.019129
Artery_Aorta	21_48065023_A_T_b37	ENSG00000160310.12	PRMT2	1	ENSG00000086548.8	CEACAM6	0.922065	0.00666803
Artery_Aorta	10_74995827_G_A_b37	ENSG00000138286.10	FAM149B1	0.877839	ENSG00000244733.4	RP11-506M13.3	0.374667	0.0786345
Artery_Aorta	15_80353787_C_T_b37	ENSG00000140406.2	MESDC1	0.983687	ENSG00000179300.3	ZCCHC5	1	0.0805945
Artery_Aorta	5_122081840_C_T_b37	ENSG00000260686.1	CTB-36H16.2	1	ENSG00000263931.1		1	0.091479
Artery_Aorta	17_40131565_C_T_b37	ENSG00000173786.12	CNP	0.98077	ENSG00000033030.9	ZCCHC8	0.923611	0.0800421
Artery_Aorta	5_70675730_A_G_b37	ENSG00000226259.6	GTF2H2B	0.336043	ENSG00000183474.11	GTF2H2C	0.310848	0
Artery_Aorta	16_74311453_G_A_b37	ENSG00000214331.4	RP11-252A24.2	0.579238	ENSG00000247228.2	RP11-296I10.3	0.930767	1.10403e-08
Artery_Aorta	16_77247503_C_T_b37	ENSG00000205078.5	SYCE1L	1	ENSG00000138642.10	HERC6	0.981478	0.0887074
Artery_Aorta	1_201160137_A_G_b37	ENSG00000170075.8	GPR37L1	0.947168	ENSG00000116985.6	BMP8B	0.867449	0.064764
Artery_Aorta	1_29567981_C_T_b37	ENSG00000116353.11	MECR	0.94896	ENSG00000101298.9	SNPH	1	0.0353264
Artery_Aorta	11_22297770_G_C_b37	ENSG00000171714.10	ANO5	0.999152	ENSG00000151612.11	ZNF827	0.999048	0.00105241
Artery_Aorta	9_125027119_A_C_b37	ENSG00000119446.9	RBM18	0.987937	ENSG00000226221.1	RPL26P19	0.530357	0.00897598
Artery_Aorta	1_220973535_CG_C_b37	ENSG00000186205.8	2016-03-01	0.999287	ENSG00000178081.8	ULK4P3	0.293875	0.0109792
Artery_Aorta	6_15272718_T_C_b37	ENSG00000047579.15	DTNBP1	1	ENSG00000159140.13	SON	0.932143	0.0178021
Artery_Aorta	19_45594170_A_G_b37	ENSG00000267348.2	CTB-179K24.3	1	ENSG00000249476.1	CTD-2587M2.1	0.979871	0.00775653
Artery_Aorta	4_87540141_T_G_b37	ENSG00000109339.14	MAPK10	0.991905	ENSG00000143751.9	SDE2	0.873006	0.0640942
Artery_Aorta	16_31606623_T_C_b37	ENSG00000140682.14	TGFB1I1	1	ENSG00000272812.1	RP5-855D21.3	0.605	0.00738394
Artery_Aorta	2_71220793_T_G_b37	ENSG00000144043.7	TEX261	0.99908	ENSG00000089818.12	NECAP1	0.863359	0.0424724
Artery_Aorta	16_19042255_A_G_b37	ENSG00000170537.8	TMC7	0.876837	ENSG00000127399.10	LRRC61	1	0.0472923
Artery_Aorta	7_86975057_C_CA_b37	ENSG00000182165.13	TP53TG1	0.990012	ENSG00000119537.11	KDSR	0.966962	0.0072639
Artery_Aorta	9_35659107_C_T_b37	ENSG00000137135.13	ARHGEF39	0.91937	ENSG00000198546.10	ZNF511	0.993199	0.0581565
Artery_Aorta	19_21561508_TCTC_T_b37	ENSG00000172687.9	ZNF738	0.797769	ENSG00000225953.2	SATB2-AS1	1	0.0869585
Artery_Aorta	2_203744610_G_A_b37	ENSG00000144426.14	NBEAL1	0.948048	ENSG00000271711.1		0.892066	0.0182343
Artery_Aorta	4_130058670_T_C_b37	ENSG00000151470.8	C4orf33	0.982241	ENSG00000257359.1	RP11-780K2.1	1	0.00288217
Artery_Aorta	12_7960852_G_A_b37	ENSG00000177575.8	CD163	1	ENSG00000138356.9	AOX1	0.995813	0.000966008
Artery_Aorta	17_79995320_A_G_b37	ENSG00000169738.3	DCXR	1	ENSG00000133808.4	MICALCL	1	0.0433531
Artery_Aorta	12_53376815_A_G_b37	ENSG00000135480.10	KRT7	1	ENSG00000169570.5	DTWD2	0.833052	0.0807288
Artery_Aorta	22_38240368_G_C_b37	ENSG00000100124.8	ANKRD54	0.937016	ENSG00000100505.9	TRIM9	1	0.0928134
Artery_Aorta	16_19606891_G_A_b37	ENSG00000167191.7	GPRC5B	1	ENSG00000180957.13	PITPNB	1	0.0317989
Artery_Aorta	7_38323216_G_A_b37	ENSG00000227191.2	TRGC2	0.51218	ENSG00000100360.10	IFT27	1	0.02217
Artery_Aorta	1_201160137_A_G_b37	ENSG00000170075.8	GPR37L1	0.947168	ENSG00000054179.7	ENTPD2	1	0.00139142
Artery_Aorta	22_50946588_C_G_b37	ENSG00000100258.13	LMF2	1	ENSG00000172354.5	GNB2	0.993487	0.000498518
Artery_Aorta	12_7366581_CTG_C_b37	ENSG00000139197.6	PEX5	0.984088	ENSG00000026950.12	BTN3A1	0.853714	0.0334357
Artery_Aorta	20_32702302_T_G_b37	ENSG00000250917.1	RP4-785G19.5	1	ENSG00000269242.1	CTD-2192J16.22	0.87819	0.0237954
Artery_Aorta	1_171319485_G_A_b37	ENSG00000117523.11	PRRC2C	0.93553	ENSG00000231289.1	RP11-782C8.6	0.367673	0.0632695
Artery_Aorta	12_3975825_AT_A_b37	ENSG00000111224.9	PARP11	0.957054	ENSG00000167377.13	ZNF23	0.977772	0.0925717
Artery_Aorta	10_63434648_A_T_b37	ENSG00000183346.6	C10orf107	1	ENSG00000261646.1		1	0.0552524
Artery_Aorta	22_38973167_TTC_T_b37	ENSG00000100211.6	CBY1	0.978438	ENSG00000261441.1	RP11-217B1.2	1	0.0593519
Artery_Aorta	19_17008105_A_T_b37	ENSG00000130477.10	UNC13A	0.983891	ENSG00000238231.2	RP11-460I13.6	1	0.0555866
Artery_Aorta	5_234555_A_C_b37	ENSG00000249915.3	PDCD6	0.815286	ENSG00000074855.6	ANO8	0.994305	0.040121
Artery_Aorta	9_32494547_A_G_b37	ENSG00000241043.1	GVQW1	0.856546	ENSG00000267248.1	CTD-2319I12.4	0.860499	0.0374674
Artery_Aorta	16_72035359_T_C_b37	ENSG00000102967.7	DHODH	0.943312	ENSG00000260401.1	RP11-800A3.4	1	0.0699888
Artery_Aorta	15_62808539_C_T_b37	ENSG00000259370.1	RP11-1069G10.1	1	ENSG00000025293.11	PHF20	0.946108	0.00513081
Artery_Aorta	1_231148306_C_T_b37	ENSG00000143643.8	TTC13	1	ENSG00000178980.10	SEPW1	0.962361	0.0450076
Artery_Aorta	17_78193831_T_C_b37	ENSG00000181045.10	SLC26A11	0.953526	ENSG00000145283.7	SLC10A6	1	0.0994473
Artery_Aorta	15_32936148_T_C_b37	ENSG00000198826.6	ARHGAP11A	0.846631	ENSG00000159450.8	TCHH	0.971945	0.0923199
Artery_Aorta	20_1104297_G_T_b37	ENSG00000125818.13	PSMF1	0.990019	ENSG00000115896.11	PLCL1	0.996212	0.0337369
Artery_Aorta	11_68172462_T_TA_b37	ENSG00000110697.8	PITPNM1	0.988755	ENSG00000027847.9	B4GALT7	0.999746	0.00814633
Artery_Aorta	4_87540141_T_G_b37	ENSG00000109339.14	MAPK10	0.991905	ENSG00000141867.13	BRD4	0.992538	0.00190592
Artery_Aorta	14_55735112_C_T_b37	ENSG00000131981.11	LGALS3	0.922378	ENSG00000272677.1	RP11-127B20.3	1	0.0337446
Artery_Aorta	2_233792109_G_T_b37	ENSG00000066248.10	NGEF	0.9904	ENSG00000270210.1	RP11-373D23.3	1	0.000245186
Artery_Aorta	1_153829632_AT_A_b37	ENSG00000273026.1	RP11-422P24.10	0.914056	ENSG00000257647.1	RP11-701H24.3	1	0.077752
Artery_Aorta	20_62896665_G_A_b37	ENSG00000203880.7	PCMTD2	0.841489	ENSG00000165494.6	PCF11	0.965616	0.0827527
Artery_Aorta	4_100236762_C_T_b37	ENSG00000187758.3	ADH1A	0.849589	ENSG00000170088.9	TMEM192	0.790962	0.00765676
Artery_Aorta	18_6534959_G_C_b37	ENSG00000088756.8	ARHGAP28	0.925157	ENSG00000163611.7	SPICE1	0.974027	0.0290729
Artery_Aorta	15_34139566_A_G_b37	ENSG00000259408.1	RP11-3D4.3	0.954654	ENSG00000145741.11	BTF3	0.856073	0.0178834
Artery_Aorta	19_49451292_T_C_b37	ENSG00000169136.4	ATF5	0.975141	ENSG00000205361.4	MT1DP	1	0.00119596
Artery_Aorta	8_101946380_C_CTT_b37	ENSG00000164924.13	YWHAZ	0.711409	ENSG00000262061.1	RP11-1260E13.4	0.976471	0.0356636
Artery_Aorta	5_177352825_G_A_b37	ENSG00000249684.1	RP11-423H2.3	0.80207	ENSG00000239605.4	C2orf61	0.934702	0.0122966
Artery_Aorta	2_70371939_T_C_b37	ENSG00000116005.7	PCYOX1	0.887639	ENSG00000269430.1	LRRC3DN	1	0.000467845
Artery_Coronary	10_51579517_C_CA_b37	ENSG00000174194.11	AGAP8	0.183724	ENSG00000188234.9	AGAP4	0.111497	0.0559556
Artery_Coronary	3_39448804_G_A_b37	ENSG00000168028.9	RPSA	0.787579	ENSG00000183298.4	RPSAP19	0.153558	0
Artery_Coronary	19_8394092_T_C_b37	ENSG00000233927.4	RPS28	0.949371	ENSG00000237039.1	AC018738.2	0.285539	8.84093e-12
Artery_Coronary	19_8394092_T_C_b37	ENSG00000233927.4	RPS28	0.949371	ENSG00000227097.4	RPS28P7	0.340555	0.0022686
Artery_Coronary	17_18477409_T_C_b37	ENSG00000213077.5	FAM106A	0.304802	ENSG00000188933.10	USP32P1	0.359227	0.0554085
Artery_Coronary	17_44801340_C_T_b37	ENSG00000108379.5	WNT3	0.997901	ENSG00000204650.9	CRHR1-IT1	0.935777	0.0381925
Artery_Coronary	7_128318168_A_G_b37	ENSG00000243679.1	RP11-274B21.3	0.345899	ENSG00000234419.1	CICP13	0.21686	0.010036
Artery_Coronary	7_128318168_A_G_b37	ENSG00000243302.3	RP11-274B21.2	0.160049	ENSG00000234419.1	CICP13	0.21686	6.09942e-05
Artery_Coronary	7_128318168_A_G_b37	ENSG00000230715.2	RP11-274B21.4	0.292784	ENSG00000234419.1	CICP13	0.21686	0.000232484
Artery_Coronary	5_177267396_G_A_b37	ENSG00000170089.11	RP11-423H2.1	0.566867	ENSG00000051596.5	THOC3	0.506533	0.0395805
Artery_Coronary	16_89629780_G_A_b37	ENSG00000167526.9	RPL13	0.888324	ENSG00000215030.4	RPL13P12	0.743772	0
Artery_Coronary	7_128318168_A_G_b37	ENSG00000243679.1	RP11-274B21.3	0.345899	ENSG00000253326.2	RP11-261C10.7	0.34244	2.66303e-11
Artery_Coronary	7_128318168_A_G_b37	ENSG00000243302.3	RP11-274B21.2	0.160049	ENSG00000253326.2	RP11-261C10.7	0.34244	4.27816e-09
Artery_Coronary	7_128318168_A_G_b37	ENSG00000230715.2	RP11-274B21.4	0.292784	ENSG00000253326.2	RP11-261C10.7	0.34244	3.68408e-11
Artery_Coronary	6_26665835_G_A_b37	ENSG00000181315.6	ZNF322	0.526872	ENSG00000188801.8	ZNF322P1	0.514348	0.000541989
[truncated: 14,650 more rows]
