# Supplementary material for: Identifying cis -mediators for trans -eQTLs across many human tissues using genomic mediation analysis
Source: HighWire-hosted journal article supplement (doi:10.1101/gr.216754.116), 2017-10-11
Supplement: SupplementalMaterials.docx [file SupplementalMaterials.docx]

**Supplemental Methods**

A detailed description of each step of the GMAC algorithm is presented below:

***Step 1: Adaptive filtering to eliminate variables from the pool of potential confounders***

Let **H** be the pool of candidate confounding variables (constructed or real variables). Unlike existing methods ([Price et al. 2006](#_ENREF_3); [Leek and Storey 2007](#_ENREF_2); [Stegle et al. 2012](#_ENREF_5)) that use the top constructed variables, here we consider a full set of confounding variables and the dimensionality of **H** may exceed the sample size (for example, when there are a large number of real covariates or we may consider other genes in the genome as potential confounders for each trio).

For each trio (*Li*, *Ci*, *Tj*), we propose to first filter out potential common child variables, **Zij**, of *Ci* and *Tj*, and intermediate variables, **Wij**, from *Ci* to *Tj*. The confounding variables, common child variables and intermediate variables share a commonality --- they are correlated with both *Ci* and *Tj*. However, adjusting for common child variables in mediation analyses would “marry” *Ci* and *Tj* and make *Ci* appearing to be regulating *Tj* even if there is no such effect (i.e., “collider bias”) ([Greenland 2003](#_ENREF_1)) increasing the false positive rate for detecting mediation. Adjusting for intermediate variables in a test for mediation would prevent the detection of the true mediation effect from *Ci* to *Tj* and hurt the power to detect true mediation. Existing methods to select confounders are often based on the correlation between each candidate variable and gene expression levels (pairs of cis- and trans-genes or the expression data matrix), which would not distinguish confounders and common child/intermediate variables.

We argue that it is possible to filter common child and intermediate variables by utilizing the randomness in the inheritance of genetic loci. Given the cis-association (*Li* 🡪 *Ci*), both common child and intermediate variables are affected by the cis-gene transcript, and as such are associated with the locus, *Li*. On the other hand, the confounders are assumed to be not associated with *Li*, since the genotypes are Mendelian randomized ([Smith and Ebrahim 2003](#_ENREF_4)). Therefore, for each trio we propose to filter the variables that are associated with *Li*, at a liberal significance threshold of 10% FDR ([Storey and Tibshirani 2003](#_ENREF_6)) from the pool **H**, and only consider the retained variables in the subsequent adaptive adjustment and mediation test.

***Step 2: Adaptive selection of potential confounding variables***

Different mediation trios may be affected by a different subset of variables in **H**. We propose to adaptively select the confounder sets for each trio using a stratified FDR approach ([Sun et al. 2006](#_ENREF_7)).

Specifically, for each trio, we first obtain the *p*-values of association for each candidate variable to the pair of expression levels, *Ci* and *Tj*. Here the candidate variables are the ones retained after filtering child and intermediate variables specific to the trio. We use a linear regression with each candidate variable as the response and *Ci* and *Tj* as predictors, and obtain the *p*-value of the overall F-test for testing whether the candidate variable is associated with at least one of the cis and the trans-gene expression levels.

For each candidate confounding variable we then apply a predefined FDR threshold (10%) to the *p*-values corresponding to the joint associations of this variable to all the potential mediation trios, and we select the significant ones. We repeat this procedure for all candidate variables. Note that a confounder would be associated with both the cis- and trans-gene transcript. By using an *F*-test to test the joint association to either cis- or trans-gene, we obtain a superset of the confounder set. In calculating the FDR, a key parameter to be estimated is , the proportion of true null hypotheses. For real variables, we estimate using the R qvalue package ([Storey and Tibshirani 2003](#_ENREF_6)). For PCA, we estimate as one minus the percentage of variation each PC explained in the overall expression matrix.

As shown in Figure 2E in the main text, by applying the same FDR threshold to each candidate confounding variable to all trios, we identified the significant “pair”-wise associations of candidate confounders to mediation trios for all variables and all trios. It can be shown that under pertinent assumptions (confounders being independent of each other), the overall FDR is controlled at the FDR significance level. When performing the mediation test for each trio, we propose to consider only the subsets in **H** that are significantly associated with that trio.

***Mediation test and p-value calculation***

Consider one potential mediation trio, (*Li*, *Ci*, *Tj*) with the adaptively selected set of potential confounding variables for this trio, **X*ij***. Here **X*ij*** is a subset of variables in **H**, often with much lower dimensionality. Those variables are significantly associated with at least one of *Ci* and *Tj* (i.e., the ones checked in the row corresponding to the trio in Figure 2E in the main text.)

Given cis- and trans-associations, we propose to test for non-zero mediation effects from the cis-gene transcript to the trans-gene transcript based on the following regression:

*Tj = β0 + β1 Ci + β2 Li +* ***Γ* X*ij*** *+ ɛ*

We are interested in testing non-zero mediation effects captured by *β1*.Under the null hypothesis, after adjusting for confounders, there is no mediation effect given the effect from *Li* to *Ci* and the direct effect from *Li* to *Tj.* Under the alternative, in the presence of effect from *Li* to *Ci* and the potential direct effect from *Li* to *Tj* (the dashed arrow in Figure 2B in the main text), the effect from *Ci* to *Tj* is non-zero,(i.e., *β1 ≠ 0*)*.* We can obtain the Wald statistic for testing *β1* from the regression as the mediation test statistic.

To calculate the *p*-value for mediation for each trio, we propose to permute the cis-gene expression levels within each genotype group and obtain the null mediation statistics based on the trios with the same locus and trans- gene but permuted cis-expression levels, (*Li*, *Ci0*, *Tj*). We assume that confounding effects have been well adjusted. Given cis- and trans-associations, under the null hypothesis, there is no mediation effect. By permuting the cis-gene expression levels within each genotype group, one maintains the cis-associations while breaks the potential mediation effects from the cis- to the trans-gene transcript. That is, conditioning on the genetic locus, the permuted cis-gene expression is not correlated with the trans-gene expression levels, i.e., no mediation. Figure 2F in the main text shows the expression variation patterns of a hypothetical mediation relationship *Li*🡪 *Ci*🡪 *Tj* on the left panel, and a null relationship entailed by (*Li*, *Ci0*, *Tj*) with *Li*🡪 *Ci0* and *Li*🡪 *Tj* but no mediation. A *p*-value of mediation is calculated for each trio by comparing the observed statistic versus the null ones.

**Reference**

Greenland S. 2003. Quantifying biases in causal models: classical confounding vs collider-stratification bias. *Epidemiology* **14**: 300-306.

Leek JT, Storey JD. 2007. Capturing heterogeneity in gene expression studies by surrogate variable analysis. *PLoS genetics* **3**: 1724-1735.

Price AL, Patterson NJ, Plenge RM, Weinblatt ME, Shadick NA, Reich D. 2006. Principal components analysis corrects for stratification in genome-wide association studies. *Nature genetics* **38**: 904-909.

Smith GD, Ebrahim S. 2003. 'Mendelian randomization': can genetic epidemiology contribute to understanding environmental determinants of disease? *International journal of epidemiology* **32**: 1-22.

Stegle O, Parts L, Piipari M, Winn J, Durbin R. 2012. Using probabilistic estimation of expression residuals (PEER) to obtain increased power and interpretability of gene expression analyses. *Nat Protoc* **7**: 500-507.

Storey JD, Tibshirani R. 2003. Statistical significance for genomewide studies. *Proceedings of the National Academy of Sciences of the United States of America* **100**: 9440-9445.

Sun L, Craiu RV, Paterson AD, Bull SB. 2006. Stratified false discovery control for large-scale hypothesis testing with application to genome-wide association studies. *Genetic epidemiology* **30**: 519-530.

**Supplemental Tables**

**Supplemental Table S1.** Descriptive statistics for the number of PCs selected by GMAC all for trios in each tissue type of GTEx data.

| Tissue name | # PCs to be selected  (Tissue sample size minus one) | # PCs being selected | | | | |
| --- | --- | --- | --- | --- | --- | --- |
| Mean | Median | Minimum | Maximum | Standard deviation |
| Muscle Skeletal | 360 | 12.39 | 12 | 4 | 22 | 2.65 |
| Whole Blood | 337 | 9.759 | 10 | 0 | 17 | 2.59 |
| Skin Sun Exposed Lower leg | 301 | 10.48 | 11 | 2 | 18 | 2.42 |
| Adipose Subcutaneous | 297 | 10.76 | 11 | 2 | 19 | 2.51 |
| Artery Tibial | 284 | 10.18 | 10 | 1 | 17 | 2.21 |
| Lung | 277 | 10.21 | 10 | 1 | 18 | 2.26 |
| Thyroid | 277 | 9.918 | 10 | 3 | 18 | 2.33 |
| Cells Transformed fibroblasts | 271 | 8.885 | 9 | 2 | 18 | 2.21 |
| Nerve Tibial | 255 | 9.084 | 9 | 1 | 17 | 2.22 |
| Esophagus Mucosa | 240 | 9.02 | 9 | 2 | 17 | 2.28 |
| Esophagus Muscularis | 217 | 7.897 | 8 | 0 | 14 | 2.08 |
| Artery Aorta | 196 | 7.78 | 8 | 1 | 14 | 2.05 |
| Skin Not Sun Exposed Suprapubic | 195 | 8.011 | 8 | 2 | 14 | 1.94 |
| Heart Left Ventricle | 189 | 6.753 | 7 | 1 | 13 | 1.84 |
| Adipose Visceral Omentum | 184 | 7.525 | 8 | 1 | 14 | 1.98 |
| Breast Mammary Tissue | 182 | 7.055 | 7 | 1 | 13 | 2.05 |
| Stomach | 169 | 6.046 | 6 | 1 | 12 | 1.80 |
| Colon Transverse | 168 | 5.835 | 6 | 1 | 12 | 1.78 |
| Heart Atrial Appendage | 158 | 6.2 | 6 | 0 | 12 | 1.78 |
| Testis | 156 | 4.954 | 5 | 0 | 10 | 1.62 |
| Pancreas | 148 | 5.72 | 6 | 0 | 12 | 1.82 |
| Esophagus Gastroesophageal Junction | 126 | 5.645 | 6 | 0 | 10 | 1.71 |
| Adrenal Gland | 125 | 5.31 | 5 | 1 | 10 | 1.72 |
| Colon Sigmoid | 123 | 5.347 | 5 | 1 | 11 | 1.75 |
| Artery Coronary | 117 | 5.421 | 5 | 1 | 10 | 1.65 |
| Cells EBV-transformed lymphocytes | 113 | 5.023 | 5 | 1 | 10 | 1.59 |
| Brain Cerebellum | 102 | 4.389 | 4 | 0 | 9 | 1.52 |
| Brain Caudate basal ganglia | 99 | 4.514 | 5 | 1 | 9 | 1.42 |
| Liver | 96 | 4.089 | 4 | 0 | 8 | 1.38 |
| Brain Cortex | 95 | 4.103 | 4 | 0 | 8 | 1.27 |
| Brain Nucleus accumbens basal ganglia | 92 | 4.554 | 5 | 0 | 9 | 1.50 |
| Brain Frontal Cortex BA9 | 91 | 4.198 | 4 | 0 | 9 | 1.31 |
| Brain Cerebellar Hemisphere | 88 | 4.164 | 4 | 0 | 9 | 1.37 |
| Spleen | 88 | 4.298 | 4 | 0 | 9 | 1.41 |
| Pituitary | 86 | 3.948 | 4 | 0 | 8 | 1.38 |
| Prostate | 86 | 3.93 | 4 | 0 | 8 | 1.36 |
| Ovary | 84 | 4.209 | 4 | 1 | 8 | 1.47 |
| Brain Putamen basal ganglia | 81 | 3.844 | 4 | 0 | 7 | 1.27 |
| Brain Hippocampus | 80 | 4.181 | 4 | 1 | 7 | 1.27 |
| Brain Hypothalamus | 80 | 3.851 | 4 | 0 | 7 | 1.34 |
| Vagina | 78 | 3.456 | 3 | 1 | 8 | 1.23 |
| Small Intestine Terminal Ileum | 76 | 3.265 | 3 | 0 | 7 | 1.10 |
| Brain Anterior cingulate cortex BA24 | 71 | 3.115 | 3 | 1 | 6 | 1.06 |
| Uterus | 69 | 2.843 | 3 | 0 | 7 | 1.20 |

**Supplemental Table S2.** A complete list of all instances of cis-mediation of trans-eQTLs with a mediation P-value <0.1 (16,648 trios), including trios containing transcripts with low mappability.
